# Supplementary material for: Uncoupling of mucosal gene regulation, mRNA splicing and adherent microbiota signatures in inflammatory bowel disease
Source: PubMed Central journal article supplement — Gut. 2016 Sep 30;66(12):2087–97. doi: 10.1136/gutjnl-2016-311651 (PMC5749366; doi:10.1136/gutjnl-2016-311651), 2016-09-30
Supplement: gutjnl-2016-311651supp003.pdf [file gutjnl-2016-311651supp003.pdf]

## upreg\_DEGs

| Gene_ID            | Gene_Symbol | baseMean    | log2FoldChange | lfcSE       | stat        | pvalue      | padj        |
|--------------------|-------------|-------------|----------------|-------------|-------------|-------------|-------------|
| ENSG0000019991.11  | HGF         | 120.5839366 | 2.019034016    | 0.183460741 | 11.00526471 | 3.60456E-28 | 8.97319E-24 |
| ENSG00000136689.14 | IL1RN       | 191.5120792 | 3.899807095    | 0.372774989 | 10.4615578  | 1.29705E-25 | 1.61444E-21 |
| ENSG00000103888.11 | KIAA1199    | 116.7224759 | 3.624497812    | 0.352837951 | 10.27241486 | 9.38261E-25 | 7.78569E-21 |
| ENSG0000018280.12  | SLC11A1     | 37.2592514  | 3.966209652    | 0.388146963 | 10.21831944 | 1.64162E-24 | 1.02166E-20 |
| ENSG00000119535.13 | CSF3R       | 171.463044  | 3.144067579    | 0.318371118 | 9.875477972 | 5.31788E-23 | 2.64767E-19 |
| ENSG00000169429.6  | IL8         | 301.1804291 | 5.361234298    | 0.546021064 | 9.818731642 | 9.35127E-23 | 3.87984E-19 |
| ENSG00000095752.2  | IL11        | 30.51118759 | 6.673933463    | 0.682028101 | 9.785423002 | 1.3005E-22  | 4.62496E-19 |
| ENSG00000125538.7  | IL1B        | 210.8287069 | 3.885492628    | 0.400029158 | 9.71302355  | 2.65347E-22 | 8.25693E-19 |
| ENSG00000162493.12 | PDPN        | 88.92067759 | 2.34287363     | 0.242702723 | 9.653264724 | 4.76152E-22 | 1.31704E-18 |
| ENSG00000124731.8  | TREM1       | 27.53353743 | 4.862884426    | 0.506349283 | 9.603814191 | 7.70396E-22 | 1.74348E-18 |
| ENSG00000149968.7  | MMP3        | 314.1495277 | 5.231984215    | 0.544554038 | 9.607832923 | 7.40919E-22 | 1.74348E-18 |
| ENSG00000102265.7  | TIMP1       | 364.2507087 | 1.940732512    | 0.204730564 | 9.479446933 | 2.55634E-21 | 4.8952E-18  |
| ENSG00000157551.13 | KCNJ15      | 26.6300245  | 4.400092025    | 0.46378394  | 9.48737471  | 2.36926E-21 | 4.8952E-18  |
| ENSG00000105825.7  | TFPI2       | 58.94360077 | 3.510554163    | 0.371076032 | 9.460471326 | 3.06558E-21 | 5.45104E-18 |
| ENSG00000159167.7  | STC1        | 39.16217104 | 3.094443154    | 0.329197225 | 9.39996732  | 5.458E-21   | 9.0581E-18  |
| ENSG00000129451.7  | KLK10       | 29.90976127 | 4.888711929    | 0.521504939 | 9.374238981 | 6.96766E-21 | 1.08408E-17 |
| ENSG0000007908.11  | SELE        | 36.83411078 | 4.342720825    | 0.467489783 | 9.289445428 | 1.55094E-20 | 2.27113E-17 |
| ENSG00000122641.9  | INHBA       | 84.39235027 | 3.763523492    | 0.408189269 | 9.220045149 | 2.96975E-20 | 4.10717E-17 |
| ENSG00000106366.7  | STRIPINE1   | 107.0411026 | 3.623869407    | 0.395819744 | 9.155352813 | 5.41805E-20 | 7.09878E-17 |
| ENSG00000184557.3  | SOCS3       | 453.7585382 | 2.892171559    | 0.316364353 | 9.141900876 | 6.13641E-20 | 7.63799E-17 |
| ENSG00000123496.3  | IL13RA2     | 13.14344889 | 4.420804849    | 0.488328624 | 9.052929992 | 1.39183E-19 | 1.54924E-16 |
| ENSG00000134827.3  | TCN1        | 30.89819586 | 4.974009326    | 0.549622125 | 9.049870986 | 1.43137E-19 | 1.54924E-16 |
| ENSG00000163347.5  | CLDN1       | 45.71831882 | 2.493143225    | 0.275259665 | 9.057423002 | 1.33569E-19 | 1.54924E-16 |
| ENSG00000171049.8  | FRP2        | 50.76386314 | 4.684317869    | 0.522356941 | 8.967656984 | 3.02889E-19 | 3.14171E-16 |
| ENSG00000164932.8  | CTHRC1      | 24.05824362 | 2.243684445    | 0.251561197 | 8.919040279 | 4.70346E-19 | 4.68352E-16 |
| ENSG00000163739.4  | CXCL1       | 184.4010815 | 2.955981315    | 0.331669022 | 8.912443195 | 4.99201E-19 | 4.77966E-16 |
| ENSG00000122861.11 | PLAU        | 228.8654753 | 1.735204667    | 0.196171229 | 8.845357597 | 9.12357E-19 | 8.41193E-16 |
| ENSG00000078098.9  | FAP         | 23.21574502 | 2.762523846    | 0.312624662 | 8.836551241 | 9.87187E-19 | 8.7768E-16  |
| ENSG00000087916.7  | SLC6A14     | 182.4224505 | 4.292757059    | 0.486067329 | 8.831609955 | 1.0318E-18  | 8.85709E-16 |
| ENSG00000174175.12 | SELP        | 67.26375651 | 1.919487948    | 0.217507682 | 8.82492027  | 1.09538E-18 | 9.08945E-16 |
| ENSG00000128578.5  | STRIP2      | 34.03279829 | 2.185769909    | 0.248352463 | 8.801080059 | 1.35506E-18 | 1.08815E-15 |
| ENSG00000114270.11 | COL7A1      | 226.6817433 | 2.661551661    | 0.303155702 | 8.779487381 | 1.64221E-18 | 1.27754E-15 |
| ENSG00000163220.10 | S100A9      | 395.1738396 | 4.022027568    | 0.46007379  | 8.742135841 | 2.28744E-18 | 1.72556E-15 |
| ENSG00000196611.4  | MMP1        | 434.7686468 | 3.909477113    | 0.447903242 | 8.728396552 | 2.58309E-18 | 1.89127E-15 |
| ENSG00000171051.4  | FRP1        | 91.77504541 | 3.689345765    | 0.424127022 | 8.698681223 | 3.35763E-18 | 2.38814E-15 |
| ENSG00000163735.6  | CXCL5       | 90.33120471 | 5.37000063     | 0.621622498 | 8.638684482 | 5.6864E-18  | 3.93214E-15 |
| ENSG00000162747.5  | FCGR3B      | 82.99052125 | 4.454044336    | 0.519354832 | 8.57611032  | 9.81354E-18 | 6.4289E-15  |
| ENSG00000164294.9  | GPX8        | 100.9571863 | 1.504564524    | 0.175416734 | 8.577086634 | 9.73063E-18 | 6.4289E-15  |
| ENSG00000166670.5  | MMP10       | 25.5546138  | 4.502536486    | 0.525541815 | 8.567418162 | 1.05831E-17 | 6.75528E-15 |
| ENSG00000070193.4  | FGF10       | 16.89511841 | 1.964393716    | 0.229800848 | 8.548243996 | 1.24975E-17 | 7.77784E-15 |
| ENSG00000211896.2  | IGHG1       | 9190.797756 | 3.770387258    | 0.44124648  | 8.544855145 | 1.28698E-17 | 7.81414E-15 |
| ENSG00000140285.5  | FGF7        | 128.9722913 | 1.878812227    | 0.221044523 | 8.499700441 | 1.90081E-17 | 1.12663E-14 |
| ENSG00000196352.9  | CD55        | 875.8406819 | 1.989503589    | 0.234379738 | 8.488377049 | 2.09543E-17 | 1.21311E-14 |
| ENSG00000151726.9  | ACSL1       | 391.9278697 | 2.044678026    | 0.241134687 | 8.479402336 | 2.26354E-17 | 1.28065E-14 |
| ENSG00000163359.11 | COL6A3      | 2661.762691 | 1.598139872    | 0.189421468 | 8.436952194 | 3.2572E-17  | 1.80188E-14 |
| ENSG00000103569.5  | AQP9        | 120.3690239 | 5.17289932     | 0.615608259 | 8.402908595 | 4.35554E-17 | 2.3571E-14  |
| ENSG00000255398.2  | HCAR3       | 25.56282868 | 4.097194973    | 0.4902006   | 8.358200656 | 6.36821E-17 | 3.37298E-14 |
| ENSG00000123843.8  | CABPB       | 54.49097508 | 2.75865682     | 0.33242206  | 8.298657501 | 1.05294E-17 | 5.2424E-14  |
| ENSG00000128918.10 | ALDH1A2     | 54.61644547 | 3.891675145    | 0.46887375  | 8.300049091 | 1.04068E-16 | 5.2424E-14  |
| ENSG00000253755.1  | IGHG1       | 26.15292803 | 4.678472047    | 0.564124732 | 8.293329083 | 1.10122E-16 | 5.37526E-14 |
| ENSG00000143546.5  | S100A8      | 162.8081675 | 4.29343643     | 0.519777007 | 8.260150735 | 1.45489E-16 | 6.96499E-14 |
| ENSG00000110799.9  | VWF         | 758.6482656 | 1.596097254    | 0.193539836 | 8.246866826 | 1.62601E-16 | 7.63736E-14 |
| ENSG00000123610.3  | TNFAIP6     | 35.52777147 | 3.513969115    | 0.429714973 | 8.177441652 | 2.89934E-16 | 1.33659E-13 |
| ENSG00000167460.10 | TPM4        | 2428.514637 | 0.781503411    | 0.095687479 | 8.167248436 | 3.15503E-16 | 1.42802E-13 |
| ENSG00000158859.9  | ADAMTS4     | 44.5123493  | 2.793897977    | 0.342895733 | 8.147952013 | 3.70139E-16 | 1.6454E-13  |
| ENSG00000104415.9  | WISP1       | 42.93118094 | 2.484750141    | 0.305271395 | 8.13947911  | 3.96982E-16 | 1.73377E-13 |
| ENSG00000173852.9  | DPY19L1     | 304.1922635 | 0.806623142    | 0.099336298 | 8.120124846 | 4.65704E-16 | 1.99884E-13 |
| ENSG00000111344.7  | RASAL1      | 36.20494915 | 1.260941176    | 0.155334656 | 8.117577925 | 4.75577E-16 | 2.00662E-13 |
| ENSG00000135480.10 | KRT7        | 11.03694585 | 3.564951088    | 0.441688859 | 8.071181815 | 6.9621E-16  | 2.88857E-13 |
| ENSG00000162745.6  | OLFML2B     | 35.59738144 | 1.508692263    | 0.186977711 | 8.068834798 | 7.09722E-16 | 2.89636E-13 |
| ENSG00000163638.9  | ADAMTS9     | 137.0938915 | 1.318188894    | 0.163575647 | 8.058588899 | 7.71802E-16 | 3.09891E-13 |
| ENSG00000073756.7  | PTGS2       | 198.1729446 | 2.940997371    | 0.365527951 | 8.045889146 | 8.56215E-16 | 3.38327E-13 |
| ENSG00000185201.12 | IFITM2      | 208.1391875 | 1.51230155     | 0.188187282 | 8.036151713 | 9.2704E-16  | 3.60589E-13 |
| ENSG00000162551.9  | ALPL        | 50.81537119 | 2.277609925    | 0.283744901 | 8.026963364 | 9.99149E-16 | 3.82659E-13 |
| ENSG00000091879.9  | ANGPT2      | 40.24496642 | 1.589488638    | 0.198776734 | 7.996351525 | 1.2816E-15  | 4.83397E-13 |
| ENSG00000198759.7  | EGFL6       | 9.197546961 | 3.014604685    | 0.377131579 | 7.993509028 | 1.31151E-15 | 4.87295E-13 |
| ENSG00000102359.5  | SRPX2       | 34.29846048 | 1.806924746    | 0.226604295 | 7.973920992 | 1.53718E-15 | 5.62743E-13 |
| ENSG00000145623.8  | OSMR        | 189.6991107 | 1.461769398    | 0.183447193 | 7.968338856 | 1.60821E-15 | 5.74286E-13 |
| ENSG00000152661.7  | GJA1        | 287.1293929 | 1.039901127    | 0.130512464 | 7.967829994 | 1.61485E-15 | 5.74286E-13 |
| ENSG00000151012.9  | SLC7A11     | 191.4145587 | 1.77166381     | 0.223019847 | 7.943973763 | 1.95805E-15 | 6.76996E-13 |
| ENSG00000163191.5  | S100A11     | 634.2040352 | 1.288735282    | 0.162219359 | 7.944398829 | 1.95135E-15 | 6.76996E-13 |
| ENSG00000104312.6  | RIPK2       | 77.78008067 | 1.23886525     | 0.156095724 | 7.936573936 | 2.07842E-15 | 7.08771E-13 |
| ENSG00000211936.2  | IGHV4-4     | 40.87067206 | 4.695969815    | 0.594039045 | 7.905153461 | 2.67604E-15 | 9.00233E-13 |
| ENSG00000115461.4  | IGHFBP5     | 1672.857418 | 1.958794304    | 0.248091447 | 7.895452775 | 2.89263E-15 | 9.60122E-13 |
| ENSG00000166130.10 | IKBIP       | 100.9866907 | 1.001932738    | 0.127001292 | 7.889153883 | 3.04242E-15 | 9.96553E-13 |
| ENSG00000108342.8  | CSF3        | 11.3373803  | 6.939504408    | 0.879898371 | 7.886711283 | 3.10254E-15 | 1.00305E-12 |
| ENSG00000198535.5  | C2CD4A      | 26.43926127 | 2.89819522     | 0.368597584 | 7.862762388 | 3.75753E-15 | 1.18405E-12 |
| ENSG00000186340.10 | THBS2       | 80.00703607 | 2.726266745    | 0.347419182 | 7.847196942 | 4.25439E-15 | 1.30752E-12 |
| ENSG00000244482.5  | LILRA6      | 15.80542385 | 2.920348433    | 0.37209959  | 7.848297907 | 4.21722E-15 | 1.30752E-12 |
| ENSG00000247844.1  | CCAT1       | 11.8417659  | 2.485581334    | 0.317638284 | 7.825194438 | 5.06873E-15 | 1.53879E-12 |
| ENSG00000211897.3  | IGHG3       | 874.6201047 | 3.700382188    | 0.473324487 | 7.817854968 | 5.3731E-15  | 1.61154E-12 |
| ENSG00000258227.2  | CLEC5A      | 9.398429019 | 3.857869519    | 0.495217034 | 7.790260137 | 6.68714E-15 | 1.98178E-12 |
| ENSG00000182782.7  | HCAAR2      | 23.74432845 | 3.082586712    | 0.396091306 | 7.782515463 | 7.10965E-15 | 2.08221E-12 |
| ENSG00000112559.9  | MDF1        | 12.74154153 | 2.037357685    | 0.262198998 | 7.77027257  | 7.83174E-15 | 2.26702E-12 |
| ENSG00000124875.5  | CXCL6       | 61.3931554  | 2.805447769    | 0.361946711 | 7.750996708 | 9.11741E-15 | 2.60884E-12 |
| ENSG00000154096.9  | THY1        | 195.4425184 | 1.518444083    | 0.197078456 | 7.704769548 | 1.3108E-14  | 3.69716E-12 |
| ENSG00000180871.3  | CXCR2       | 38.44848449 | 3.692453629    | 0.479786706 | 7.696031554 | 1.40357E-14 | 3.88228E-12 |
| ENSG00000087245.8  | MMP2        | 943.7712665 | 1.311831202    | 0.170520634 | 7.693093645 | 1.43619E-14 | 3.92886E-12 |
| ENSG00000125810.9  | CD93        | 588.6334161 | 0.871779852    | 0.113365227 | 7.690011089 | 1.47122E-14 | 3.98094E-12 |
| ENSG00000165434.6  | PNGM2L1     | 250.2336422 | 0.815897939    | 0.106160303 | 7.685527568 | 1.52368E-14 | 4.07854E-12 |
| ENSG00000139289.9  | PHLDA1      | 336.1188256 | 1.300747547    | 0.169378831 | 7.679516601 | 1.5969E-14  | 4.22907E-12 |
| ENSG00000099985.3  | OSM         | 25.2166815  | 4.079543743    | 0.532213036 | 7.665245816 | 1.78489E-14 | 4.67716E-12 |
| ENSG00000103257.4  | SLC7A5      | 95.49125317 | 1.746416008    | 0.229334239 | 7.615156024 | 2.63373E-14 | 6.82959E-12 |
| ENSG00000151388.6  | ADAMTS12    | 55.01099116 | 1.579763392    | 0.207518847 | 7.612626097 | 2.68582E-14 | 6.89286E-12 |
| ENSG00000168404.8  | MLKL        | 211.8314237 | 0.924569294    | 0.122069173 | 7.574142339 | 3.61508E-14 | 9.18304E-1  |

## upreg\_DEGs

|                    |               |             |             |             |             |             |             |
|--------------------|---------------|-------------|-------------|-------------|-------------|-------------|-------------|
| ENSG00000005102.8  | MEOX1         | 33.49327256 | 1.485845033 | 0.199687712 | 7.440843606 | 1.00044E-13 | 2.14699E-11 |
| ENSG00000203747.5  | FCGR3A        | 144.6646232 | 2.742875256 | 0.369025014 | 7.432762424 | 1.06353E-13 | 2.26286E-11 |
| ENSG00000166741.3  | NNMT          | 128.911537  | 1.830170623 | 0.246342028 | 7.429388484 | 1.09101E-13 | 2.2995E-11  |
| ENSG00000167755.9  | KLK6          | 8.09058011  | 8.833408436 | 1.189140725 | 7.428396192 | 1.09922E-13 | 2.2995E-11  |
| ENSG00000127954.8  | STEAP4        | 130.7004374 | 1.794565748 | 0.241723782 | 7.424034701 | 1.13605E-13 | 2.35674E-11 |
| ENSG00000143226.9  | FCGR2A        | 327.4969244 | 1.877563915 | 0.253179262 | 7.4159467   | 1.20759E-13 | 2.48444E-11 |
| ENSG00000049449.4  | RCN1          | 370.3852907 | 0.826565052 | 0.111970168 | 7.382011355 | 1.55916E-13 | 3.18145E-11 |
| ENSG00000140274.9  | DUOXA2        | 195.4120558 | 4.911682659 | 0.666067378 | 7.374152857 | 1.65393E-13 | 3.3204E-11  |
| ENSG00000185479.5  | KRT6B         | 5.01354301  | 6.290327725 | 0.853008659 | 7.374283558 | 1.65231E-13 | 3.3204E-11  |
| ENSG00000115956.9  | PLEK          | 519.3975956 | 2.024523663 | 0.274784106 | 7.367688383 | 1.73612E-13 | 3.45752E-11 |
| ENSG00000176697.14 | BDNF          | 5.37621502  | 2.537748924 | 0.344524656 | 7.36594285  | 1.75899E-13 | 3.47527E-11 |
| ENSG00000006075.11 | CCL3          | 44.17238865 | 2.604495845 | 0.354062703 | 7.356029954 | 1.89461E-13 | 3.71372E-11 |
| ENSG00000116701.10 | NCF2          | 200.5316751 | 1.59200325  | 0.216568125 | 7.351050621 | 1.96655E-13 | 3.82463E-11 |
| ENSG00000128595.12 | CALU          | 968.6564057 | 0.882645635 | 0.120571983 | 7.320487    | 2.47073E-13 | 4.76793E-11 |
| ENSG00000087510.5  | TFAP2C        | 6.756049861 | 2.254792893 | 0.308104356 | 7.318276581 | 2.51176E-13 | 4.80982E-11 |
| ENSG00000108821.9  | COL1A1        | 1624.505284 | 1.867369666 | 0.255362114 | 7.312633956 | 2.61956E-13 | 4.97796E-11 |
| ENSG00000112541.9  | PDE10A        | 47.82481898 | 1.659002484 | 0.227101046 | 7.305129206 | 2.77E-13    | 5.22398E-11 |
| ENSG00000182240.11 | BACE2         | 674.9928005 | 1.217518528 | 0.166784733 | 7.299939908 | 2.87896E-13 | 5.38864E-11 |
| ENSG00000152766.5  | ANKRD22       | 141.4513441 | 1.871710747 | 0.256916438 | 7.28528997  | 3.20979E-13 | 5.96303E-11 |
| ENSG00000163464.7  | CXCR1         | 19.04505686 | 4.602921285 | 0.631921962 | 7.28400271  | 3.24058E-13 | 5.97564E-11 |
| ENSG00000224397.1  | RP11-290F20.3 | 6.480675807 | 3.090926466 | 0.424403557 | 7.282989074 | 3.26504E-13 | 5.97646E-11 |
| ENSG00000118946.7  | PCDH17        | 74.03842218 | 1.478697945 | 0.203292626 | 7.273741174 | 3.49666E-13 | 6.35371E-11 |
| ENSG00000187116.9  | LILRA5        | 35.37618112 | 2.376501669 | 0.326979485 | 7.268045179 | 3.64727E-13 | 6.57935E-11 |
| ENSG0000011422.7   | PLAUR         | 245.1181998 | 1.814683164 | 0.249725515 | 7.266711083 | 3.68345E-13 | 6.59683E-11 |
| ENSG00000164379.4  | FOXQ1         | 11.28541533 | 2.628460266 | 0.361774015 | 7.26547556  | 3.71728E-13 | 6.60986E-11 |
| ENSG00000140937.9  | CDH11         | 386.1408748 | 1.060531172 | 0.14613344  | 7.25727917  | 3.94954E-13 | 6.92393E-11 |
| ENSG00000163032.7  | VSNL1         | 24.92045337 | 2.229548615 | 0.307205328 | 7.25751936  | 3.94254E-13 | 6.92393E-11 |
| ENSG00000248323.1  | LUCAT1        | 9.651472176 | 4.332545499 | 0.597268066 | 7.25393796  | 4.04826E-13 | 7.04736E-11 |
| ENSG00000213088.5  | DARC          | 66.0373767  | 1.250144946 | 0.172490771 | 7.247604816 | 4.24206E-13 | 7.33346E-11 |
| ENSG00000197405.3  | C5AR1         | 44.38877021 | 1.978093518 | 0.273322656 | 7.237210224 | 4.58008E-13 | 7.80935E-11 |
| ENSG00000211973.2  | IGHV1-69      | 95.65221703 | 2.615860102 | 0.361412298 | 7.237883486 | 4.55741E-13 | 7.80935E-11 |
| ENSG00000131746.8  | TNSA          | 64.43130679 | 2.037563942 | 0.28184305  | 7.229427673 | 4.85034E-13 | 8.2139E-11  |
| ENSG00000249992.1  | TMEM158       | 14.60501072 | 2.39409042  | 0.331549554 | 7.220912803 | 5.16399E-13 | 8.68595E-11 |
| ENSG00000259379.1  | RP11-925D8.5  | 2.893994481 | 6.019922976 | 0.83482523  | 7.210997891 | 5.55433E-13 | 9.27983E-11 |
| ENSG00000108691.5  | CCL2          | 177.4341628 | 1.6536383   | 0.22950049  | 7.205380247 | 5.78821E-13 | 9.60611E-11 |
| ENSG00000169248.8  | CXCL11        | 191.6068537 | 4.317027847 | 0.5996252   | 7.199543729 | 6.04144E-13 | 9.95997E-11 |
| ENSG00000029153.10 | ARNTL2        | 172.3035346 | 1.340275533 | 0.186389975 | 7.190706127 | 6.44571E-13 | 1.05565E-10 |
| ENSG00000166527.3  | CLEC4D        | 7.352252223 | 3.721705753 | 0.518656788 | 7.175661896 | 7.19582E-13 | 1.1708E-10  |
| ENSG00000131873.5  | CHSY1         | 282.4380267 | 0.698685102 | 0.097395321 | 7.173702937 | 7.29959E-13 | 1.17997E-10 |
| ENSG00000081041.8  | CXCL2         | 47.33087649 | 2.205604249 | 0.307812332 | 7.165418736 | 7.75491E-13 | 1.24549E-10 |
| ENSG00000140105.13 | WARS          | 1923.480551 | 2.215376546 | 0.30976635  | 7.151766324 | 8.56683E-13 | 1.36707E-10 |
| ENSG00000211893.3  | IGHG2         | 2664.372238 | 3.41095035  | 0.477907499 | 7.137260569 | 9.52093E-13 | 1.50964E-10 |
| ENSG00000065911.7  | MTHFD2        | 446.993319  | 0.918391716 | 0.129026228 | 7.117868445 | 1.09609E-12 | 1.69479E-10 |
| ENSG00000145860.7  | RNF145        | 480.9784083 | 0.824743057 | 0.115855639 | 7.11871313  | 1.08939E-12 | 1.69479E-10 |
| ENSG00000204262.7  | COL5A2        | 988.7466096 | 1.220157719 | 0.171683198 | 7.107030453 | 1.18566E-12 | 1.82197E-10 |
| ENSG00000133048.8  | CH13L1        | 163.6675739 | 4.281401119 | 0.602728139 | 7.103370227 | 1.21751E-12 | 1.85942E-10 |
| ENSG00000085063.10 | CD59          | 1313.689468 | 0.737975928 | 0.10395844  | 7.098759177 | 1.25882E-12 | 1.9108E-10  |
| ENSG00000164692.13 | COL1A2        | 2795.267044 | 1.437300579 | 0.202826096 | 7.086369111 | 1.37676E-12 | 2.07716E-10 |
| ENSG00000163734.4  | CXCL3         | 53.13282633 | 2.450700498 | 0.345921366 | 7.084559488 | 1.39487E-12 | 2.09181E-10 |
| ENSG00000050555.13 | LAMC3         | 29.80132156 | 2.134217196 | 0.301740631 | 7.073018944 | 1.51599E-12 | 2.23949E-10 |
| ENSG00000176170.9  | SPHK1         | 24.70447894 | 1.621906239 | 0.230039395 | 7.050558634 | 1.78201E-12 | 2.59423E-10 |
| ENSG00000215182.6  | MUC5AC        | 9.037681075 | 5.531847023 | 0.784869918 | 7.048106819 | 1.81368E-12 | 2.62499E-10 |
| ENSG00000151617.11 | EDNRA         | 56.89588263 | 1.196684173 | 0.17014256  | 7.033420538 | 2.01531E-12 | 2.88328E-10 |
| ENSG00000000938.8  | FGFR          | 88.55736073 | 1.841390094 | 0.261951399 | 7.029510455 | 2.07259E-12 | 2.94829E-10 |
| ENSG00000103494.8  | RPGRIPL1      | 67.24699383 | 0.603377876 | 0.085872433 | 7.026444402 | 2.11863E-12 | 2.99666E-10 |
| ENSG00000120708.12 | TGFB1         | 1115.500938 | 0.936086157 | 0.133543419 | 7.009601535 | 2.38998E-12 | 3.34248E-10 |
| ENSG00000124107.5  | SLPI          | 121.2472365 | 1.972754369 | 0.281430965 | 7.00972747  | 2.38783E-12 | 3.34248E-10 |
| ENSG00000100644.12 | HIF1A         | 1852.453917 | 0.913436395 | 0.13033449  | 7.008401203 | 2.41057E-12 | 3.35244E-10 |
| ENSG00000105835.7  | NAMPT         | 1071.351722 | 1.491920365 | 0.213012002 | 7.003926299 | 2.48887E-12 | 3.44211E-10 |
| ENSG00000173535.9  | TNFRSF10C     | 47.57193358 | 2.194006806 | 0.313309053 | 7.002692032 | 2.5109E-12  | 3.45339E-10 |
| ENSG00000122679.4  | RAMP3         | 67.1550527  | 1.294565765 | 0.184909496 | 7.001077788 | 2.54001E-12 | 3.45524E-10 |
| ENSG00000131203.8  | IDO1          | 562.7049033 | 3.353568937 | 0.478966034 | 7.001684245 | 2.52904E-12 | 3.45524E-10 |
| ENSG00000136859.5  | ANGPTL2       | 167.0336209 | 1.335414848 | 0.19081282  | 6.998559361 | 2.58608E-12 | 3.49879E-10 |
| ENSG00000112303.9  | VNN2          | 87.19367224 | 2.066356024 | 0.29547443  | 6.993349718 | 2.68399E-12 | 3.61164E-10 |
| ENSG00000115008.5  | IL1A          | 9.011645911 | 3.532285794 | 0.506265984 | 6.977134361 | 3.01262E-12 | 4.03205E-10 |
| ENSG00000229644.4  | NAMPTL        | 619.8606962 | 1.49919013  | 0.215074823 | 6.970551515 | 3.15701E-12 | 4.18035E-10 |
| ENSG00000135636.9  | DYSF          | 139.7469698 | 1.571182596 | 0.225587553 | 6.964846147 | 3.28763E-12 | 4.33028E-10 |
| ENSG00000211950.2  | IGHV1-24      | 41.71448383 | 2.676656922 | 0.385418613 | 6.944804508 | 3.78985E-12 | 4.9395E-10  |
| ENSG00000114251.9  | WNT5A         | 281.7237515 | 1.426112863 | 0.205745307 | 6.931447836 | 4.16555E-12 | 5.4009E-10  |
| ENSG00000131042.9  | LILRB2        | 59.19760659 | 1.576751288 | 0.227721181 | 6.924043179 | 4.38932E-12 | 5.66154E-10 |
| ENSG00000163563.7  | MNDA          | 116.0636851 | 1.849238284 | 0.267454147 | 6.914225494 | 4.70426E-12 | 5.98628E-10 |
| ENSG00000151948.7  | GLT1D1        | 7.805073403 | 3.639407072 | 0.527359672 | 6.901185791 | 5.15702E-12 | 6.48378E-10 |
| ENSG00000185499.12 | MUC1          | 251.4910967 | 2.006590612 | 0.290886892 | 6.898181617 | 5.26724E-12 | 6.58908E-10 |
| ENSG00000142748.8  | FCN3          | 5.937962994 | 3.826908197 | 0.555266364 | 6.892022359 | 5.50047E-12 | 6.84644E-10 |
| ENSG00000159339.9  | PADI4         | 4.115445268 | 3.251179264 | 0.473713471 | 6.863176718 | 6.73458E-12 | 8.27504E-10 |
| ENSG00000130508.6  | PXDN          | 368.0210998 | 1.094883331 | 0.159559826 | 6.861898527 | 6.79513E-12 | 8.29206E-10 |
| ENSG00000117394.15 | SLC2A1        | 271.9914468 | 0.949260192 | 0.138372606 | 6.860174301 | 6.87766E-12 | 8.35183E-10 |
| ENSG00000110080.14 | ST3GAL4       | 300.4763347 | 1.161961267 | 0.169425515 | 6.858242481 | 6.97129E-12 | 8.42443E-10 |
| ENSG00000136048.9  | DRAM1         | 173.0869877 | 1.214688667 | 0.177603981 | 6.839309904 | 7.95756E-12 | 0.00000001  |
| ENSG00000142089.11 | IFITM3        | 495.2722163 | 1.390120043 | 0.203612376 | 6.827286596 | 8.65357E-12 | 0.00000001  |
| ENSG00000050344.8  | NFE2L3        | 238.3228265 | 0.861604594 | 0.126298092 | 6.821992151 | 8.97866E-12 | 1.06436E-09 |
| ENSG00000113916.13 | BCL6          | 156.3227696 | 1.469415628 | 0.215612287 | 6.815082983 | 9.42094E-12 | 1.1075E-09  |
| ENSG00000166923.6  | GREM1         | 859.2111335 | 2.575248436 | 0.377883847 | 6.814920654 | 9.43158E-12 | 1.1075E-09  |
| ENSG00000164111.10 | ANXA5         | 976.9164573 | 0.84451401  | 0.124105915 | 6.804784552 | 1.01201E-11 | 1.18276E-09 |
| ENSG00000153395.5  | LPCAT1        | 265.0057788 | 1.260939853 | 0.185576241 | 6.794726754 | 1.08518E-11 | 1.25649E-09 |
| ENSG00000126262.4  | FFAR2         | 67.03631129 | 2.291052052 | 0.337859188 | 6.781085535 | 1.19276E-11 | 1.36205E-09 |
| ENSG00000144837.4  | PLA1A         | 23.95454973 | 2.527011082 | 0.372626011 | 6.78162825  | 1.18829E-11 | 1.36205E-09 |
| ENSG00000211962.2  | IGHV1-46      | 67.37439617 | 2.312133841 | 0.340927841 | 6.781886264 | 1.18617E-11 | 1.36205E-09 |
| ENSG00000112096.12 | SOD2          | 4244.890592 | 1.23623886  | 0.182587137 | 6.770678817 | 1.2818E-11  | 1.45041E-09 |
| ENSG00000168461.8  | RAB31         | 335.1044181 | 1.076738519 | 0.159170787 | 6.76467423  | 1.33609E-11 | 1.50369E-09 |
| ENSG00000106080.6  | FKBP14        | 124.4741622 | 0.572576629 | 0.084682431 | 6.761457158 | 1.36611E-11 | 1.52312E-09 |
| ENSG00000117385.11 | LEPRE1        | 114.6586742 | 0.786059022 | 0.116263909 | 6.760989106 | 1.37053E-11 | 1.52312E-09 |
| ENSG00000101294.12 | HM13          | 366.7690154 | 0.612829559 | 0.090674893 | 6.758536335 | 1.39393E-11 | 1.54224E-09 |
| ENSG00000129277.9  | CCL4          | 46.62887782 | 2.114775527 | 0.313597879 | 6.743590014 | 1.5452E-11  | 1.68712E-09 |
| ENSG00000211640.3  | IGLV6-57      | 89.32458743 | 2.256051069 | 0.334754708 | 6.73941551  | 1.59025E-11 | 1.72872E-09 |
| ENSG00000134013.11 | LOXL2         | 140.4980783 | 1.345088961 |             |             |             |             |

## upreg\_DEGs

|                    |               |             |             |             |             |             |             |
|--------------------|---------------|-------------|-------------|-------------|-------------|-------------|-------------|
| ENSG00000182885.12 | GPR97         | 32.63938607 | 1.968240634 | 0.297872158 | 6.607669027 | 3.90418E-11 | 3.87214E-09 |
| ENSG00000164542.8  | KIAA0895      | 36.84732191 | 1.228865712 | 0.186040228 | 6.605376282 | 3.96509E-11 | 3.90146E-09 |
| ENSG00000159403.11 | C1R           | 580.2292579 | 1.062802703 | 0.161143849 | 6.59536625  | 4.24207E-11 | 4.14126E-09 |
| ENSG00000140379.7  | BCL2A1        | 85.63261705 | 1.944152912 | 0.294973955 | 6.59093076  | 4.37078E-11 | 4.25024E-09 |
| ENSG00000060558.3  | GNA15         | 46.52063441 | 1.540734364 | 0.234164522 | 6.579708788 | 4.71371E-11 | 4.53062E-09 |
| ENSG00000179776.13 | CDH5          | 171.3981769 | 0.998228099 | 0.151810437 | 6.575490567 | 4.8493E-11  | 4.64302E-09 |
| ENSG00000068366.15 | ACSL4         | 652.3683099 | 1.178430852 | 0.179299546 | 6.57241404  | 4.9506E-11  | 4.72185E-09 |
| ENSG00000103313.7  | MEFV          | 52.56767846 | 2.050061128 | 0.311946944 | 6.571826294 | 4.97018E-11 | 4.72243E-09 |
| ENSG00000143387.8  | CTSK          | 322.0986016 | 1.347408712 | 0.205493266 | 6.556948258 | 5.49201E-11 | 5.1984E-09  |
| ENSG00000006118.10 | TMEM132A      | 50.55575273 | 1.454561121 | 0.221894116 | 6.555203672 | 5.5566E-11  | 5.23962E-09 |
| ENSG00000187513.8  | GJA4          | 16.46186613 | 1.478566395 | 0.225790248 | 6.548406812 | 5.81541E-11 | 5.44244E-09 |
| ENSG00000163629.8  | PTPN13        | 186.3014523 | 0.893643896 | 0.136492951 | 6.547179847 | 5.86337E-11 | 5.46677E-09 |
| ENSG00000183615.5  | FAM167B       | 9.67068863  | 1.530370252 | 0.234035254 | 6.539058644 | 6.19072E-11 | 5.75044E-09 |
| ENSG00000100368.9  | CSF2RB        | 437.6957195 | 1.482781022 | 0.226909984 | 6.53466628  | 6.37515E-11 | 5.89974E-09 |
| ENSG00000145391.9  | SETD7         | 638.115894  | 0.712930976 | 0.10913119  | 6.532788443 | 6.45563E-11 | 0.000000006 |
| ENSG00000102794.5  | IRG1          | 16.78051002 | 8.555119309 | 1.309709319 | 6.532074854 | 6.48647E-11 | 0.000000006 |
| ENSG00000161638.6  | ITGA5         | 355.4826776 | 1.267146508 | 0.194035356 | 6.53049288  | 6.55536E-11 | 0.000000006 |
| ENSG00000117461.10 | PIK3R3        | 235.2101464 | 0.926041317 | 0.142423658 | 6.502018917 | 7.92491E-11 | 7.2001E-09  |
| ENSG00000162734.8  | PEA15         | 325.4313835 | 0.70916085  | 0.109207463 | 6.493703185 | 8.37517E-11 | 7.58151E-09 |
| ENSG00000170525.14 | PFKFB3        | 310.9622919 | 1.378330273 | 0.212359674 | 6.4905462   | 8.55257E-11 | 7.71405E-09 |
| ENSG0000017483.10  | SLC38A5       | 93.24445215 | 1.000424402 | 0.15418776  | 6.488351606 | 8.67806E-11 | 7.79897E-09 |
| ENSG00000184588.13 | PDE4B         | 297.9494008 | 1.666697941 | 0.256910613 | 6.487462401 | 8.72941E-11 | 7.81691E-09 |
| ENSG00000253686.1  | CTB-43E15.3   | 2.968038076 | 3.724555692 | 0.574741989 | 6.480396013 | 9.14822E-11 | 8.13342E-09 |
| ENSG00000113721.9  | PDGFRB        | 380.6189612 | 0.968091391 | 0.149413266 | 6.479286741 | 9.21572E-11 | 8.16222E-09 |
| ENSG00000173110.6  | HSPA6         | 25.3377719  | 1.693660117 | 0.261416166 | 6.478788748 | 9.24618E-11 | 8.16222E-09 |
| ENSG00000204577.7  | LILRB3        | 8.569142577 | 2.447273696 | 0.377859347 | 6.476678987 | 9.37634E-11 | 8.21987E-09 |
| ENSG00000223350.2  | IGLV9-49      | 12.57196368 | 2.885390418 | 0.445729952 | 6.473404811 | 9.58188E-11 | 8.36952E-09 |
| ENSG00000101194.13 | SLC17A9       | 86.63246793 | 1.421395182 | 0.219783922 | 6.467239138 | 9.98096E-11 | 8.66145E-09 |
| ENSG00000118785.9  | SPP1          | 44.83357434 | 1.880388491 | 0.290759203 | 6.467167591 | 9.98569E-11 | 8.66145E-09 |
| ENSG00000062038.9  | CDH3          | 64.69553266 | 3.362240101 | 0.520552352 | 6.458985515 | 1.05407E-10 | 9.11113E-09 |
| ENSG00000175592.4  | FOSL1         | 7.584482381 | 3.430057384 | 0.531322465 | 6.455698014 | 1.07721E-10 | 9.27894E-09 |
| ENSG00000122862.4  | SRGN          | 918.6111069 | 1.335903013 | 0.206985664 | 6.454084734 | 1.08875E-10 | 9.34597E-09 |
| ENSG00000108639.3  | SYNGR2        | 655.1613539 | 0.458996344 | 0.071165405 | 6.449711715 | 1.12063E-10 | 9.58659E-09 |
| ENSG00000172927.3  | MYEOV         | 42.464411   | 2.700455516 | 0.418752201 | 6.448815094 | 1.12728E-10 | 9.61045E-09 |
| ENSG00000182492.11 | BGN           | 60.65137887 | 1.508349561 | 0.233957375 | 6.44711269  | 1.14001E-10 | 9.68581E-09 |
| ENSG00000179431.5  | FJX1          | 7.749013275 | 1.810664465 | 0.280986675 | 6.443951346 | 1.16402E-10 | 9.82279E-09 |
| ENSG00000110347.7  | MMP12         | 441.3558118 | 2.469096689 | 0.383455722 | 6.439065959 | 1.20211E-10 | 1.01099E-08 |
| ENSG00000254087.3  | LYN           | 483.4308607 | 0.791772061 | 0.123018831 | 6.43618589  | 1.22513E-10 | 1.02688E-08 |
| ENSG00000211945.2  | IGHV1-18      | 71.56946028 | 2.576019815 | 0.400314533 | 6.434989492 | 1.23482E-10 | 1.03153E-08 |
| ENSG00000090376.4  | IRAK3         | 228.9472252 | 1.148699045 | 0.178567849 | 6.432843607 | 1.25238E-10 | 1.0427E-08  |
| ENSG00000214050.3  | FBXO16        | 11.19096565 | 1.341235311 | 0.208745021 | 6.425232577 | 1.31668E-10 | 1.09258E-08 |
| ENSG00000137462.6  | TLR2          | 135.4828532 | 1.426375105 | 0.222284766 | 6.41688195  | 1.39094E-10 | 1.14604E-08 |
| ENSG00000141756.14 | FKBP10        | 135.2428546 | 0.968041923 | 0.150868839 | 6.416447079 | 1.39491E-10 | 1.14604E-08 |
| ENSG00000249751.1  | ECSCR         | 23.05941225 | 1.053526822 | 0.164218779 | 6.415385815 | 1.40467E-10 | 1.15026E-08 |
| ENSG00000088882.7  | CPXM1         | 32.75263884 | 2.100236807 | 0.327570401 | 6.411558559 | 1.44039E-10 | 1.1718E-08  |
| ENSG00000166147.9  | FBN1          | 1082.069551 | 1.051967612 | 0.1640692   | 6.411731226 | 1.43876E-10 | 1.1718E-08  |
| ENSG00000059377.11 | TBXAS1        | 175.8041224 | 0.846981864 | 0.132291517 | 6.402389851 | 1.52963E-10 | 1.24035E-08 |
| ENSG00000118473.17 | SGIP1         | 36.77703904 | 1.324196068 | 0.20690992  | 6.399867497 | 1.55512E-10 | 1.25692E-08 |
| ENSG00000123838.6  | CABPA         | 48.72907305 | 2.838153785 | 0.443658652 | 6.397156404 | 1.58297E-10 | 1.27529E-08 |
| ENSG00000038427.11 | VCAN          | 989.7986433 | 1.082138077 | 0.169265173 | 6.393152584 | 1.625E-10   | 0.000000013 |
| ENSG00000136231.9  | IGFBP3        | 16.79942456 | 2.727298843 | 0.426645525 | 6.392423418 | 1.63277E-10 | 0.000000013 |
| ENSG00000154451.10 | GBP5          | 637.193993  | 2.162048602 | 0.338236007 | 6.392130215 | 1.6359E-10  | 0.000000013 |
| ENSG00000181458.6  | TMEM45A       | 36.18045857 | 1.144565167 | 0.179143495 | 6.389097004 | 1.66868E-10 | 1.31042E-08 |
| ENSG00000214455.3  | RCN1P2        | 111.0298905 | 0.782323951 | 0.12243857  | 6.389522117 | 1.66405E-10 | 1.31042E-08 |
| ENSG00000211953.2  | IGHV3-30      | 118.7829448 | 2.568172079 | 0.402097045 | 6.38694591  | 1.69231E-10 | 1.32479E-08 |
| ENSG00000057657.10 | PRDM1         | 397.0207329 | 1.082173988 | 0.169522103 | 6.383674871 | 1.72888E-10 | 1.34918E-08 |
| ENSG00000178726.6  | THBD          | 74.72980266 | 1.083315975 | 0.169717282 | 6.383062237 | 1.73581E-10 | 1.35035E-08 |
| ENSG00000149485.12 | FADS1         | 104.5062986 | 1.16919213  | 0.183201968 | 6.381984543 | 1.74808E-10 | 1.35566E-08 |
| ENSG00000221926.7  | TRIM16        | 97.74357988 | 0.631621919 | 0.099046399 | 6.377030592 | 1.80554E-10 | 1.39155E-08 |
| ENSG00000174473.11 | GALNTL6       | 18.77199689 | 2.016037514 | 0.316259477 | 6.374631162 | 1.83404E-10 | 1.40915E-08 |
| ENSG00000115590.9  | IL1R2         | 226.3294419 | 1.94260469  | 0.304794261 | 6.373494963 | 1.84768E-10 | 1.41527E-08 |
| ENSG00000156049.6  | GNA14         | 66.46473026 | 0.797760412 | 0.125200784 | 6.371848367 | 1.86763E-10 | 1.42616E-08 |
| ENSG00000041982.10 | TNC           | 1060.970564 | 1.490152818 | 0.234030688 | 6.367339381 | 1.92335E-10 | 1.46422E-08 |
| ENSG00000147697.4  | GSDMC         | 2.967579049 | 3.140615526 | 0.495233586 | 6.341685247 | 2.27265E-10 | 1.71962E-08 |
| ENSG00000251095.2  | RP11-115D19.1 | 2.157259255 | 3.796998168 | 0.598928434 | 6.339652542 | 2.30284E-10 | 1.73718E-08 |
| ENSG00000156219.12 | ART3          | 7.183287202 | 2.417743127 | 0.381406691 | 6.339016032 | 2.31237E-10 | 1.7391E-08  |
| ENSG00000137673.4  | MMP7          | 58.72449386 | 4.451913464 | 0.702734575 | 6.335127971 | 2.37144E-10 | 1.77815E-08 |
| ENSG00000169385.2  | RNASE2        | 2.980305587 | 3.102818804 | 0.48989543  | 6.333581754 | 2.39534E-10 | 1.78532E-08 |
| ENSG00000113140.6  | SPARC         | 1950.963366 | 0.992452371 | 0.15678105  | 6.33018067  | 2.44874E-10 | 1.81841E-08 |
| ENSG00000182752.8  | PAPPA         | 111.771239  | 1.592142928 | 0.251530213 | 6.329827765 | 2.45435E-10 | 1.81841E-08 |
| ENSG00000164761.4  | TNFRSF11B     | 83.13955217 | 1.30265908  | 0.206291961 | 6.314638122 | 2.70794E-10 | 1.99442E-08 |
| ENSG00000169035.7  | KLK7          | 3.946796782 | 7.473979913 | 1.184483745 | 6.309905005 | 2.79207E-10 | 2.05032E-08 |
| ENSG00000259671.1  | RP11-925D8.6  | 1.750228262 | 6.312772921 | 1.000871313 | 6.30727731  | 2.83987E-10 | 2.07928E-08 |
| ENSG00000067225.13 | PKM           | 3236.249459 | 0.584266686 | 0.092943396 | 6.286263598 | 3.25198E-10 | 2.3602E-08  |
| ENSG00000182022.13 | CHST15        | 237.2771436 | 0.973382252 | 0.154862152 | 6.285475439 | 3.26852E-10 | 2.36531E-08 |
| ENSG00000174705.7  | SH3PXD2B      | 226.9630037 | 0.936855002 | 0.149340937 | 6.273263173 | 3.53559E-10 | 2.55116E-08 |
| ENSG00000042062.7  | FAM65C        | 57.44225673 | 1.146954055 | 0.183192277 | 6.260930169 | 3.82688E-10 | 2.75336E-08 |
| ENSG00000171004.13 | HS6ST2        | 12.29690501 | 1.607957382 | 0.256898583 | 6.25911348  | 3.87172E-10 | 2.7776E-08  |
| ENSG00000071242.7  | RPS6KA2       | 228.8371111 | 0.712426396 | 0.113927215 | 6.25334688  | 4.01748E-10 | 2.87389E-08 |
| ENSG00000102096.9  | PIM2          | 451.5889258 | 1.394836591 | 0.223113127 | 6.251701144 | 4.06006E-10 | 0.000000029 |
| ENSG00000128052.8  | KDR           | 267.7671669 | 0.838613839 | 0.134224309 | 6.247853644 | 4.16131E-10 | 2.95133E-08 |
| ENSG00000091527.11 | CDV3          | 1605.796886 | 0.501854823 | 0.080332603 | 6.247212253 | 4.17843E-10 | 2.95505E-08 |
| ENSG00000125746.10 | EML2          | 219.5385528 | 0.53721616  | 0.0860345   | 6.244194576 | 4.25989E-10 | 0.000000003 |
| ENSG00000138448.7  | ITGAV         | 1598.731651 | 0.497225517 | 0.079634618 | 6.24383625  | 4.26967E-10 | 0.000000003 |
| ENSG00000108950.7  | FAM20A        | 34.2259064  | 1.613280705 | 0.2583984   | 6.243385034 | 4.28201E-10 | 0.000000003 |
| ENSG00000114999.7  | TTL           | 275.9643726 | 0.507106563 | 0.081264417 | 6.240204262 | 4.37E-10    | 3.05581E-08 |
| ENSG00000111145.3  | ELK3          | 252.0970458 | 0.876635674 | 0.140497593 | 6.239506696 | 4.38953E-10 | 3.06087E-08 |
| ENSG00000115919.10 | KYNU          | 67.82827565 | 1.904747086 | 0.305405695 | 6.236776592 | 4.46679E-10 | 3.10604E-08 |
| ENSG00000088826.13 | SMOX          | 44.53409354 | 1.125295334 | 0.180475303 | 6.235176308 | 4.5127E-10  | 3.12922E-08 |
| ENSG00000151929.5  | BAG3          | 95.18149129 | 0.859658272 | 0.138164591 | 6.22198688  | 4.90898E-10 | 3.35726E-08 |
| ENSG00000167207.7  | NOD2          | 35.24913727 | 1.130545405 | 0.182405053 | 6.197993911 | 5.71874E-10 | 3.88968E-08 |
| ENSG00000109511.6  | ANXA10        | 6.73075415  | 4.865734247 | 0.785455565 | 6.194792504 | 5.83619E-10 | 3.95875E-08 |
| ENSG00000177674.11 | AGTRAP        | 74.8693573  | 0.805274409 | 0.130069833 | 6.191092817 | 5.97485E-10 | 4.04179E-08 |
| ENSG00000140511.7  | HAPLN3        | 68.75562665 | 1.961638673 | 0.316957024 | 6.188973654 | 6.05572E-10 | 4.0854E-08  |
| ENSG00000106348.12 | IMPDH1        | 149.3780393 | 0.80964396  | 0.130947051 | 6.182987364 | 6.28998E-10 | 4.23196E-08 |
| ENSG00000239998.1  | LILRA2        | 8.927789458 |             |             |             |             |             |

## upreg\_DEGs

|                     |               |             |             |             |             |             |             |
|---------------------|---------------|-------------|-------------|-------------|-------------|-------------|-------------|
| ENSG00000128512.15  | DOCK4         | 221.6133463 | 0.860057411 | 0.140867287 | 6.10544457  | 0.000000001 | 6.57734E-08 |
| ENSG00000115902.6   | SLC1A4        | 264.7138588 | 0.684427796 | 0.11213096  | 6.103825349 | 0.000000001 | 6.61028E-08 |
| ENSG00000251230.1   | RP11-701P16.5 | 2.664931989 | 5.184601782 | 0.849365953 | 6.104084773 | 0.000000001 | 6.61028E-08 |
| ENSG00000166033.7   | HTRA1         | 137.2940526 | 0.985082762 | 0.161403426 | 6.103233307 | 0.000000001 | 6.61785E-08 |
| ENSG00000185291.6   | IL3RA         | 49.55453488 | 1.340283321 | 0.22001397  | 6.091810093 | 1.11641E-09 | 7.07174E-08 |
| ENSG00000113749.5   | HRH2          | 13.70021543 | 1.509959147 | 0.248125464 | 6.085466286 | 1.16153E-09 | 7.33885E-08 |
| ENSG00000211653.2   | IGLV1-40      | 140.2534491 | 1.983058906 | 0.325958771 | 6.083772184 | 1.17387E-09 | 7.3794E-08  |
| ENSG00000137393.8   | RNF144B       | 144.3956937 | 0.983043692 | 0.161778891 | 6.076464533 | 1.22861E-09 | 7.68469E-08 |
| ENSG00000093134.9   | VNN3          | 4.225289423 | 3.204370759 | 0.527414926 | 6.07561637  | 1.23512E-09 | 7.70606E-08 |
| ENSG00000120254.11  | MTHFD1L       | 67.93522496 | 0.793621941 | 0.130853701 | 6.064956037 | 1.3199E-09  | 8.21438E-08 |
| ENSG00000149380.7   | P4HA3         | 3.530355956 | 2.30142071  | 0.379775538 | 6.059949841 | 1.36164E-09 | 8.45303E-08 |
| ENSG00000105388.10  | CEACAM5       | 15719.97498 | 1.334448892 | 0.220296105 | 6.05752376  | 1.38233E-09 | 8.56013E-08 |
| ENSG00000169403.7   | PTAFR         | 196.2612917 | 1.157704146 | 0.191136362 | 6.05695398  | 1.38723E-09 | 8.56917E-08 |
| ENSG00000166780.6   | C16orf45      | 48.26154482 | 0.866010358 | 0.143040524 | 6.054300801 | 1.41029E-09 | 8.66857E-08 |
| ENSG00000180509.7   | KCNE1         | 5.777925753 | 2.304610172 | 0.38073832  | 6.053002942 | 1.4217E-09  | 8.71721E-08 |
| ENSG00000123405.9   | NFE2          | 9.575743549 | 2.689174908 | 0.444860093 | 6.044990209 | 1.49419E-09 | 9.09447E-08 |
| ENSG00000162174.8   | ASRGL1        | 143.4273478 | 1.05611225  | 0.174743851 | 6.043773469 | 1.50551E-09 | 9.14101E-08 |
| ENSG00000186431.14  | FCAR          | 8.471987914 | 4.056574957 | 0.671762298 | 6.03870591  | 1.55355E-09 | 9.40976E-08 |
| ENSG00000182871.10  | COL18A1       | 705.2379309 | 1.253986405 | 0.207735958 | 6.036443658 | 1.57548E-09 | 9.5194E-08  |
| ENSG00000128965.7   | CHAC1         | 17.77060753 | 1.613031189 | 0.267256643 | 6.035513924 | 1.58458E-09 | 9.55119E-08 |
| ENSG00000166401.9   | SERPINB8      | 115.7662606 | 0.809236479 | 0.1343379   | 6.02388813  | 1.70276E-09 | 1.01166E-07 |
| ENSG00000174007.7   | CEP19         | 16.54354897 | 0.869455185 | 0.144327513 | 6.024181845 | 1.69967E-09 | 1.01166E-07 |
| ENSG00000154598.5   | FOXO3         | 7.268750309 | 1.37548718  | 0.228528193 | 6.01889493  | 1.75612E-09 | 1.03632E-07 |
| ENSG00000113739.6   | STC2          | 9.201360248 | 1.893314141 | 0.314564846 | 6.018835744 | 1.75676E-09 | 1.03632E-07 |
| ENSG00000100219.12  | XBP1          | 3063.687804 | 0.82963985  | 0.138075227 | 6.008607558 | 1.87123E-09 | 1.09765E-07 |
| ENSG00000148344.10  | PTGES         | 17.15354064 | 1.383634368 | 0.230453201 | 6.003971153 | 1.92549E-09 | 1.12256E-07 |
| ENSG00000133107.10  | TRPC4         | 10.4827146  | 1.536405521 | 0.256186166 | 5.997222812 | 0.000000002 | 1.16474E-07 |
| ENSG00000166073.4   | GPR176        | 54.92741838 | 1.160238363 | 0.193476526 | 5.996791378 | 0.000000002 | 1.16512E-07 |
| ENSG00000116649.5   | SRM           | 71.62338806 | 0.761044282 | 0.126936735 | 5.995461305 | 0.000000002 | 1.17197E-07 |
| ENSG00000244437.1   | IGKV3-15      | 215.126614  | 2.158119142 | 0.360079432 | 5.993452976 | 2.05432E-09 | 1.1838E-07  |
| ENSG00000166986.8   | MARS          | 475.1634594 | 0.480203445 | 0.080174959 | 5.989444258 | 2.10559E-09 | 1.21055E-07 |
| ENSG00000162618.8   | ELTD1         | 109.2238872 | 0.949767493 | 0.158981369 | 5.974080462 | 2.31392E-09 | 1.31513E-07 |
| ENSG00000174807.3   | CD248         | 33.36185332 | 1.180368345 | 0.197597    | 5.973614701 | 2.32053E-09 | 1.31589E-07 |
| ENSG00000059804.11  | SLC2A3        | 257.9824807 | 1.582537087 | 0.265366902 | 5.963581281 | 2.46769E-09 | 1.38669E-07 |
| ENSG00000179241.8   | LDLRAD3       | 37.12500902 | 0.874111317 | 0.146616454 | 5.961890998 | 2.49335E-09 | 1.39796E-07 |
| ENSG00000173894.6   | CBX2          | 11.77353966 | 1.406243481 | 0.235966258 | 5.959510882 | 2.52994E-09 | 1.41529E-07 |
| ENSG00000123342.11  | MMP19         | 64.25773298 | 1.355262016 | 0.227508365 | 5.95697665  | 2.56947E-09 | 1.43097E-07 |
| ENSG00000146374.9   | RSP30         | 34.39675642 | 1.618246591 | 0.271721761 | 5.955528139 | 2.59233E-09 | 0.000000144 |
| ENSG000000069122.14 | GPR116        | 199.5954386 | 0.800020526 | 0.134360601 | 5.954279159 | 2.61221E-09 | 1.44187E-07 |
| ENSG00000166123.9   | GPT2          | 128.6190186 | 0.974999839 | 0.163730143 | 5.954919609 | 2.602E-09   | 1.44187E-07 |
| ENSG00000231475.2   | IGHV4-31      | 31.06308798 | 2.761852675 | 0.463830921 | 5.954438459 | 2.60966E-09 | 1.44187E-07 |
| ENSG00000130775.11  | THEMIS2       | 226.8456053 | 1.090850066 | 0.18324987  | 5.952801314 | 2.63591E-09 | 1.44853E-07 |
| ENSG00000250771.2   | RP11-153M7.3  | 4.005542033 | 3.125708573 | 0.525207983 | 5.95137293  | 2.65902E-09 | 1.45801E-07 |
| ENSG00000155660.6   | PDI4A         | 2091.346677 | 0.797267184 | 0.134052491 | 5.947425354 | 2.72393E-09 | 1.48705E-07 |
| ENSG00000157227.8   | MMP14         | 784.0462844 | 0.840109258 | 0.141266746 | 5.946971119 | 2.7315E-09  | 1.48792E-07 |
| ENSG00000100453.8   | GZMB          | 43.01829994 | 2.719660696 | 0.457437037 | 5.945431773 | 2.75729E-09 | 1.49869E-07 |
| ENSG00000120217.9   | CD274         | 134.7814901 | 1.639984356 | 0.276231169 | 5.936999658 | 2.90285E-09 | 1.57437E-07 |
| ENSG00000205403.8   | CFI           | 306.6909151 | 1.595970004 | 0.269133222 | 5.930037137 | 0.000000003 | 1.6249E-07  |
| ENSG00000112414.10  | GPR126        | 586.3398773 | 0.947874818 | 0.159889621 | 5.928307355 | 3.06073E-09 | 1.63858E-07 |
| ENSG00000249138.1   | RP11-701P16.1 | 2.320686306 | 3.311266026 | 0.558958122 | 5.923996617 | 3.1421E-09  | 1.67493E-07 |
| ENSG00000119729.6   | RHOQ          | 219.4163463 | 0.797706549 | 0.134739439 | 5.920364189 | 3.21229E-09 | 1.70869E-07 |
| ENSG00000211658.2   | IGLV3-27      | 17.99579583 | 2.287040515 | 0.386953815 | 5.91037076  | 3.41339E-09 | 0.00000018  |
| ENSG00000163453.7   | IGFBP7        | 873.7154396 | 0.823511139 | 0.139396648 | 5.907682508 | 3.46954E-09 | 1.82217E-07 |
| ENSG00000196396.5   | PTPN11        | 453.2964196 | 0.564263588 | 0.095555618 | 5.905080192 | 3.52475E-09 | 1.84727E-07 |
| ENSG00000101825.7   | MXRA5         | 880.3852086 | 1.061385925 | 0.179879545 | 5.900537072 | 3.6232E-09  | 0.000000189 |
| ENSG00000117016.5   | RIMS3         | 180.545479  | 0.700975677 | 0.118804815 | 5.900229538 | 3.62996E-09 | 0.000000189 |
| ENSG00000134668.8   | SPOCD1        | 8.78077453  | 1.683754357 | 0.285473315 | 5.898114715 | 3.67678E-09 | 1.91085E-07 |
| ENSG00000128422.11  | KRT17         | 4.31646303  | 3.915455911 | 0.664531121 | 5.892058008 | 3.81415E-09 | 1.96177E-07 |
| ENSG00000147113.12  | CXorf36       | 62.68724144 | 0.871104793 | 0.147819986 | 5.893010944 | 3.79221E-09 | 1.96177E-07 |
| ENSG00000211648.2   | IGLV1-47      | 69.62217229 | 1.97604874  | 0.335347312 | 5.89254385  | 3.80295E-09 | 1.96177E-07 |
| ENSG00000164691.12  | TAGAP         | 256.9844029 | 1.474868335 | 0.250423486 | 5.889496858 | 3.87373E-09 | 1.9883E-07  |
| ENSG00000124216.3   | SNAI1         | 5.775264865 | 1.821172699 | 0.309261313 | 5.8887828   | 3.8905E-09  | 1.9928E-07  |
| ENSG00000172965.10  | MIR4435-1HG   | 55.36668258 | 1.117140966 | 0.18978554  | 5.88633343  | 3.94857E-09 | 2.01839E-07 |
| ENSG00000122870.7   | BICC1         | 118.2427    | 0.783774373 | 0.133668511 | 5.863567783 | 4.53026E-09 | 2.29687E-07 |
| ENSG00000106236.3   | NPTX2         | 34.62350293 | 1.905260463 | 0.325006156 | 5.862228843 | 4.56695E-09 | 2.31077E-07 |
| ENSG00000106991.9   | ENG           | 206.3079712 | 0.921118135 | 0.157375875 | 5.852981818 | 4.82837E-09 | 2.41846E-07 |
| ENSG00000162892.11  | IL24          | 4.39849606  | 7.06486646  | 1.20714562  | 5.852538701 | 4.84126E-09 | 0.000000242 |
| ENSG00000100097.7   | LGALS1        | 343.3280544 | 0.825445863 | 0.141073963 | 5.851156716 | 4.88166E-09 | 0.000000243 |
| ENSG00000250548.2   | RP11-47I22.2  | 2.973957147 | 2.590846397 | 0.44278383  | 5.85126697  | 4.87842E-09 | 0.000000243 |
| ENSG00000145040.3   | UCN2          | 2.564284929 | 4.351103077 | 0.744100595 | 5.847466201 | 0.000000005 | 2.47318E-07 |
| ENSG00000113016.10  | EHD3          | 71.81048396 | 1.118612436 | 0.191401317 | 5.844329883 | 5.08611E-09 | 2.5023E-07  |
| ENSG00000150457.7   | LATS2         | 114.8853898 | 0.706638481 | 0.120910169 | 5.844326297 | 5.08622E-09 | 2.5023E-07  |
| ENSG00000163823.3   | CCR1          | 135.5479947 | 1.194319602 | 0.204714511 | 5.834073987 | 5.40901E-09 | 0.000000264 |
| ENSG00000200972.1   | RNU5A-8P      | 0.92303851  | 3.7419151   | 0.641928799 | 5.829174678 | 5.57022E-09 | 2.70302E-07 |
| ENSG00000117152.9   | RGS4          | 15.44585864 | 1.610691386 | 0.276383305 | 5.827744869 | 5.61814E-09 | 2.72097E-07 |
| ENSG00000138119.12  | MYOF          | 943.4457476 | 0.975759392 | 0.167565484 | 5.823152641 | 5.77478E-09 | 0.000000277 |
| ENSG00000184489.7   | PTP4A3        | 48.34160248 | 1.22541914  | 0.2104787   | 5.822057731 | 5.81275E-09 | 2.78274E-07 |
| ENSG00000196083.5   | ILIRAP        | 102.7936703 | 0.725884172 | 0.124688041 | 5.821602186 | 5.82862E-09 | 2.78498E-07 |
| ENSG00000170866.7   | LILRA3        | 10.29023079 | 3.155558902 | 0.542402204 | 5.817747198 | 0.000000006 | 2.8445E-07  |
| ENSG00000088836.8   | SLC4A11       | 4.484280875 | 2.008813767 | 0.345681439 | 5.81117047  | 6.20376E-09 | 2.93605E-07 |
| ENSG00000158869.6   | FECR1G        | 165.0566238 | 1.25791677  | 0.216454849 | 5.811451109 | 6.19336E-09 | 2.93605E-07 |
| ENSG00000166394.10  | CYB5R2        | 28.33302306 | 0.730310767 | 0.125663762 | 5.811625828 | 6.1869E-09  | 2.93605E-07 |
| ENSG00000110880.6   | CORO1C        | 730.8664307 | 0.455599396 | 0.078421485 | 5.80962473  | 6.2613E-09  | 2.95766E-07 |
| ENSG00000158023.5   | WDR6          | 9.421238905 | 1.18210652  | 0.203597047 | 5.806108383 | 6.39416E-09 | 3.009E-07   |
| ENSG00000211673.2   | IGLV3-1       | 311.9714219 | 2.202863717 | 0.37948206  | 5.804921894 | 6.4396E-09  | 3.02467E-07 |
| ENSG00000129450.4   | SIGLEC9       | 23.47765416 | 1.234858976 | 0.212883588 | 5.800630222 | 6.60661E-09 | 3.09727E-07 |
| ENSG00000108960.3   | MMD           | 170.1917322 | 0.582805419 | 0.100616256 | 5.792358433 | 6.94048E-09 | 3.23551E-07 |
| ENSG00000211651.2   | IGLV1-44      | 108.2521687 | 1.866394602 | 0.32229587  | 5.790935528 | 0.000000007 | 3.25087E-07 |
| ENSG00000148346.7   | LCN2          | 1322.232465 | 2.597674185 | 0.448796163 | 5.788093565 | 7.11898E-09 | 0.00000033  |
| ENSG00000243466.1   | IGKV1-5       | 483.643235  | 1.844950363 | 0.318884389 | 5.785640267 | 7.22367E-09 | 3.32395E-07 |
| ENSG00000138028.10  | CGREF1        | 35.45008578 | 1.609129098 | 0.278195683 | 5.784162721 | 7.28744E-09 | 3.34711E-07 |
| ENSG00000211966.2   | IGHV5-51      | 175.376285  | 1.699537862 | 0.294034017 | 5.780072258 | 7.46685E-09 | 3.41691E-07 |
| ENSG00000158669.7   | AGPAT6        | 421.304437  | 0.23407055  | 0.040524059 | 5.776088532 | 7.64572E-09 | 3.47392E-07 |
| ENSG00000203499.6   | FAM83H-AS1    | 50.81014872 | 0.985024008 | 0.170534932 | 5.776083496 | 7.64594E-09 | 3.47392E-07 |
| ENSG00000211955.2   | IGHV3-33      | 74.17342604 | 2.26860289  | 0.392759955 | 5.776054468 | 7.64726E-09 | 3.47392E-07 |
| ENSG00000166396.8   | SERPINB7      | 10.27777106 | 5.551742911 | 0.961554206 | 5.773718089 | 7.75411E-09 | 0.000000351 |
| ENSG00              |               |             |             |             |             |             |             |



## upreg\_DEGs

|                    |               |             |             |             |             |             |             |
|--------------------|---------------|-------------|-------------|-------------|-------------|-------------|-------------|
| ENSG00000129657.10 | SEC14L1       | 383.6377353 | 0.677476396 | 0.118236447 | 5.729843991 | 1.00523E-08 | 0.000000436 |
| ENSG00000102024.13 | PLS3          | 440.7529465 | 0.828528303 | 0.144628121 | 5.728680557 | 1.01215E-08 | 4.38198E-07 |
| ENSG00000270172.1  | RP5-1024G6.8  | 11.02168515 | 1.578043238 | 0.275789518 | 5.721911593 | 1.05332E-08 | 4.52874E-07 |
| ENSG00000143479.11 | DYRK3         | 25.42928038 | 0.959917508 | 0.167828381 | 5.719637538 | 1.06752E-08 | 4.58185E-07 |
| ENSG00000136869.13 | TLR4          | 471.1403844 | 0.847606886 | 0.148232353 | 5.718096408 | 1.07724E-08 | 4.61563E-07 |
| ENSG00000114378.12 | HYAL1         | 49.13987556 | 1.240121641 | 0.216986409 | 5.715204216 | 0.000000011 | 4.66073E-07 |
| ENSG00000196189.8  | SEMA4A        | 96.43985021 | 1.119457402 | 0.195866912 | 5.715398227 | 1.09447E-08 | 4.66073E-07 |
| ENSG00000065308.4  | TRAM2         | 713.3274252 | 0.43114305  | 0.075464145 | 5.713217207 | 1.1086E-08  | 4.69345E-07 |
| ENSG00000259772.2  | RP11-16E12.2  | 8.816400617 | 1.434793375 | 0.251295153 | 5.7095943   | 1.13246E-08 | 0.000000477 |
| ENSG00000165886.4  | UBTD1         | 11.47812406 | 1.1054855   | 0.193668433 | 5.708134697 | 1.14221E-08 | 4.80307E-07 |
| ENSG00000087303.12 | NID2          | 143.7828669 | 0.927257857 | 0.162468288 | 5.707315988 | 1.14772E-08 | 4.81808E-07 |
| ENSG00000068001.9  | HYAL2         | 179.6195257 | 0.728538142 | 0.127698132 | 5.705158976 | 1.16235E-08 | 4.86146E-07 |
| ENSG00000099260.6  | PALMD         | 40.06591606 | 1.030781953 | 0.180682653 | 5.704930348 | 1.16391E-08 | 4.86146E-07 |
| ENSG00000211949.2  | IGHV3-23      | 687.3440035 | 1.924246522 | 0.337481593 | 5.701782147 | 1.18561E-08 | 4.93556E-07 |
| ENSG00000185215.4  | TNFAIP2       | 599.9797829 | 1.184541001 | 0.20807609  | 5.69282612  | 1.24954E-08 | 5.19298E-07 |
| ENSG00000111799.16 | COL12A1       | 1228.641165 | 1.193138908 | 0.209649843 | 5.691103281 | 1.26221E-08 | 5.23691E-07 |
| ENSG00000166523.3  | CLEC4E        | 19.07055112 | 2.960736981 | 0.520302216 | 5.690417779 | 1.26729E-08 | 5.24923E-07 |
| ENSG00000172716.12 | SLFN11        | 282.3569166 | 0.845023658 | 0.148551516 | 5.688421626 | 1.28219E-08 | 5.30213E-07 |
| ENSG00000130309.6  | COLGALT1      | 478.9766471 | 0.38073852  | 0.067018875 | 5.681064064 | 1.33859E-08 | 5.51473E-07 |
| ENSG00000132205.6  | EMILIN2       | 148.9651875 | 0.888413734 | 0.156640699 | 5.671666038 | 1.41415E-08 | 0.000000579 |
| ENSG00000169245.4  | CXCL10        | 311.5313931 | 2.758823557 | 0.486553972 | 5.670128533 | 1.4269E-08  | 5.83273E-07 |
| ENSG00000268734.1  | CTB-61M7.2    | 1.525687256 | 5.222914594 | 0.9215491   | 5.667538053 | 1.44864E-08 | 5.89255E-07 |
| ENSG00000150337.9  | FCGR1A        | 22.13050088 | 2.329111197 | 0.411028479 | 5.666544569 | 1.45706E-08 | 5.9022E-07  |
| ENSG00000224373.2  | IGHV4-59      | 44.66646722 | 2.001681251 | 0.353270637 | 5.666141022 | 1.46049E-08 | 5.9022E-07  |
| ENSG00000111335.8  | OAS2          | 328.2657909 | 1.331111901 | 0.234976119 | 5.664881638 | 1.47126E-08 | 5.92902E-07 |
| ENSG00000211660.3  | IGLV2-23      | 227.8186565 | 1.857967938 | 0.327984292 | 5.664807684 | 1.4719E-08  | 5.92902E-07 |
| ENSG00000115758.8  | ODC1          | 811.9930992 | 0.727228513 | 0.128448937 | 5.661615678 | 0.000000015 | 6.02325E-07 |
| ENSG00000128203.6  | ASPHD2        | 65.91821558 | 0.922365218 | 0.163035977 | 5.657433636 | 1.53653E-08 | 0.000000613 |
| ENSG00000089723.5  | OTUB2         | 26.16939413 | 1.1362738   | 0.201183075 | 5.647959209 | 1.62364E-08 | 6.44638E-07 |
| ENSG00000260528.2  | FAM157C       | 8.112021469 | 1.972268517 | 0.349414002 | 5.644503389 | 1.65659E-08 | 6.54589E-07 |
| ENSG00000205420.6  | KRT6A         | 2.858043255 | 7.434952778 | 1.317445263 | 5.64346238  | 1.66664E-08 | 6.57065E-07 |
| ENSG00000143333.6  | RGS16         | 27.62848218 | 1.560564771 | 0.276641242 | 5.641113961 | 1.68953E-08 | 6.64444E-07 |
| ENSG00000211959.2  | IGHV4-39      | 247.9505267 | 2.167943742 | 0.384580994 | 5.637157783 | 1.7288E-08  | 6.75615E-07 |
| ENSG00000113083.8  | LOX           | 84.65933854 | 0.921737056 | 0.163605018 | 5.633916795 | 1.76162E-08 | 6.87363E-07 |
| ENSG00000116132.7  | PRRX1         | 79.58922053 | 1.960961239 | 0.348112489 | 5.63312522  | 1.76973E-08 | 6.89446E-07 |
| ENSG00000115170.9  | ACVR1         | 141.7236203 | 0.464612683 | 0.082541689 | 5.628824521 | 1.81442E-08 | 7.03554E-07 |
| ENSG00000112319.13 | EYA4          | 2.25369615  | 2.38418152  | 0.423803835 | 5.62567236  | 1.84787E-08 | 0.000000711 |
| ENSG00000101842.9  | VSIG1         | 8.394163326 | 1.847850836 | 0.328547264 | 5.624307478 | 1.86254E-08 | 7.14422E-07 |
| ENSG00000122711.4  | SPINK4        | 1956.951506 | 2.243004373 | 0.398855753 | 5.623597895 | 1.87021E-08 | 7.16261E-07 |
| ENSG00000104974.6  | LILRA1        | 14.39836444 | 1.678447764 | 0.298523411 | 5.622499617 | 1.88214E-08 | 7.18619E-07 |
| ENSG00000114013.11 | CD86          | 117.7095095 | 0.882459125 | 0.1570496   | 5.61898358  | 1.92084E-08 | 7.28924E-07 |
| ENSG00000166557.8  | TMED3         | 324.8785421 | 0.556097642 | 0.098966275 | 5.619062084 | 1.91997E-08 | 7.28924E-07 |
| ENSG00000175489.9  | LRRC25        | 55.1108543  | 0.931709816 | 0.165814122 | 5.6190016   | 1.92064E-08 | 7.28924E-07 |
| ENSG00000135631.11 | RAB11FIP5     | 108.6627498 | 0.662363976 | 0.117890588 | 5.618463578 | 1.92663E-08 | 0.000000073 |
| ENSG00000173391.4  | OLR1          | 9.493314805 | 1.810769974 | 0.322315936 | 5.617997042 | 1.93184E-08 | 7.30869E-07 |
| ENSG00000204291.6  | COL15A1       | 553.9601498 | 0.954369478 | 0.170103611 | 5.610518629 | 2.01721E-08 | 7.58557E-07 |
| ENSG00000106105.9  | GARS          | 479.2388953 | 0.552682058 | 0.098516853 | 5.610025523 | 2.02297E-08 | 7.59574E-07 |
| ENSG00000107968.5  | MAP3K8        | 109.9545858 | 0.803801986 | 0.143293701 | 5.609471871 | 2.02945E-08 | 7.6086E-07  |
| ENSG00000092929.7  | UNC13D        | 226.0871269 | 1.166961846 | 0.208155575 | 5.606195595 | 2.06822E-08 | 7.73068E-07 |
| ENSG00000177409.7  | SAMD9L        | 999.5923409 | 1.137421466 | 0.203279234 | 5.595364788 | 0.000000022 | 8.19226E-07 |
| ENSG00000244575.1  | IGKV1-27      | 66.76169582 | 1.932431441 | 0.345431658 | 5.594251115 | 2.21576E-08 | 8.23271E-07 |
| ENSG00000159399.5  | HK2           | 1377.802025 | 1.099526957 | 0.196698306 | 5.58991575  | 2.2718E-08  | 8.41579E-07 |
| ENSG00000211666.2  | IGLV2-14      | 739.9061509 | 1.826753265 | 0.326833867 | 5.589241045 | 2.28064E-08 | 8.42349E-07 |
| ENSG00000182326.10 | C1S           | 1572.093771 | 0.871540026 | 0.155973901 | 5.587729888 | 0.000000023 | 8.47195E-07 |
| ENSG00000211939.2  | IGHV1-8       | 51.69176879 | 2.676578635 | 0.479009572 | 5.587735173 | 0.000000023 | 8.47195E-07 |
| ENSG00000140932.5  | CMTM2         | 3.431596429 | 3.284550209 | 0.588105856 | 5.584964295 | 2.33748E-08 | 0.000000857 |
| ENSG00000138772.8  | ANXA3         | 265.8545856 | 1.029945281 | 0.184470333 | 5.583257005 | 2.36056E-08 | 8.62902E-07 |
| ENSG00000211976.2  | IGHV3-73      | 62.92866065 | 2.016777733 | 0.361218724 | 5.583259111 | 2.36053E-08 | 8.62902E-07 |
| ENSG00000157168.14 | NRG1          | 123.2521105 | 1.081564339 | 0.194122483 | 5.571556285 | 2.52474E-08 | 9.1753E-07  |
| ENSG00000185947.10 | ZNF267        | 357.7886167 | 0.597805287 | 0.107369856 | 5.56771995  | 2.58094E-08 | 9.36588E-07 |
| ENSG00000165507.8  | C10orf10      | 91.84945393 | 0.845843142 | 0.151928258 | 5.567385254 | 2.5859E-08  | 0.000000937 |
| ENSG00000170956.12 | CEACAM3       | 13.28328719 | 1.927136124 | 0.346476844 | 5.562092117 | 2.6656E-08  | 9.44496E-07 |
| ENSG00000168140.4  | VASN          | 33.35914717 | 1.28786435  | 0.23165935  | 5.559302272 | 2.70855E-08 | 9.77199E-07 |
| ENSG00000211947.2  | IGHV3-21      | 219.2762242 | 1.881223594 | 0.338556989 | 5.556593593 | 2.7509E-08  | 0.00000099  |
| ENSG00000150977.9  | RILPL2        | 57.82308315 | 0.842553245 | 0.151696073 | 5.554219233 | 2.78855E-08 | 9.99426E-07 |
| ENSG00000170476.11 | MZB1          | 320.4086346 | 1.413349327 | 0.254457378 | 5.554365689 | 2.78622E-08 | 9.99426E-07 |
| ENSG00000100625.8  | SIX4          | 6.816723693 | 1.280305025 | 0.230596262 | 5.552149948 | 2.82177E-08 | 1.00638E-06 |
| ENSG00000186832.4  | KRT16         | 1.094885653 | 6.128722125 | 1.104642472 | 5.548149995 | 2.88708E-08 | 1.02526E-06 |
| ENSG00000124102.4  | PI3           | 336.4528804 | 2.46259691  | 0.444256858 | 5.543182662 | 2.97023E-08 | 1.05179E-06 |
| ENSG00000105707.9  | HPN           | 4.871870341 | 1.804665053 | 0.325668126 | 5.541423635 | 0.000000003 | 1.05991E-06 |
| ENSG00000095319.10 | NUP188        | 325.3285577 | 0.418250905 | 0.075553356 | 5.535834881 | 0.000000031 | 1.09065E-06 |
| ENSG00000167123.14 | CERCAM        | 70.47389203 | 0.85927474  | 0.155259039 | 5.534458687 | 3.12191E-08 | 1.0977E-06  |
| ENSG00000135604.9  | STX11         | 45.87084524 | 1.353635749 | 0.244700704 | 5.531801613 | 3.16958E-08 | 1.10664E-06 |
| ENSG00000171241.4  | SHCBP1        | 58.32326677 | 0.971706236 | 0.175643153 | 5.532275058 | 3.16104E-08 | 1.10664E-06 |
| ENSG00000169247.7  | SH3TC2        | 26.05063731 | 1.148343682 | 0.207614421 | 5.531136406 | 3.18163E-08 | 1.10929E-06 |
| ENSG00000086300.11 | SNX10         | 174.26022   | 1.476812536 | 0.267131541 | 5.528409449 | 3.23147E-08 | 1.12509E-06 |
| ENSG00000135821.2  | GLUL          | 2660.019452 | 0.69686332  | 0.126076814 | 5.527291626 | 3.25212E-08 | 1.12913E-06 |
| ENSG00000144802.7  | NFKBIZ        | 747.9351423 | 0.88838841  | 0.160869029 | 5.522432851 | 3.34338E-08 | 1.15919E-06 |
| ENSG00000169902.9  | TPST1         | 60.88397801 | 0.953406636 | 0.172656936 | 5.521971243 | 3.35217E-08 | 1.16063E-06 |
| ENSG00000104783.7  | CKCNA         | 118.739844  | 0.985131831 | 0.178474023 | 5.51974912  | 3.39484E-08 | 1.17377E-06 |
| ENSG00000211659.2  | IGLV3-25      | 58.40934026 | 1.854095707 | 0.336394275 | 5.511674376 | 3.55436E-08 | 1.22382E-06 |
| ENSG00000226197.2  | RP11-536O18.1 | 1.242306721 | 2.344037042 | 0.4253525   | 5.510810537 | 3.57185E-08 | 1.22814E-06 |
| ENSG00000130600.11 | H19           | 34.57941195 | 1.884315756 | 0.342036912 | 5.509100605 | 3.60672E-08 | 1.23842E-06 |
| ENSG00000167645.12 | YIF1B         | 94.14351936 | 0.627137426 | 0.113966018 | 5.502845803 | 3.73709E-08 | 1.2779E-06  |
| ENSG00000139329.4  | LUM           | 1901.328767 | 1.078467996 | 0.196112809 | 5.499222632 | 3.81469E-08 | 1.29863E-06 |
| ENSG00000134757.4  | DSG3          | 69.43552701 | 2.607117815 | 0.474177888 | 5.498185129 | 3.8372E-08  | 1.30318E-06 |
| ENSG00000134871.13 | COL4A2        | 1682.182802 | 1.002038835 | 0.182305458 | 5.496482909 | 3.87441E-08 | 0.000001314 |
| ENSG00000088992.13 | TESC          | 23.43338681 | 1.360220165 | 0.247909524 | 5.486760436 | 4.09372E-08 | 1.38652E-06 |
| ENSG00000145423.4  | SFRP2         | 24.79400331 | 2.975261508 | 0.542307625 | 5.486298494 | 0.000000041 | 1.38826E-06 |
| ENSG00000237172.3  | B3GNT9        | 58.86228363 | 0.758592404 | 0.138276547 | 5.486052563 | 4.11015E-08 | 1.3883E-06  |
| ENSG00000084652.11 | TXLNA         | 668.4273302 | 0.32220248  | 0.058749015 | 5.484389495 | 4.149E-08   | 1.39953E-06 |
| ENSG00000211892.2  | IGHG4         | 562.4266754 | 2.504760421 | 0.45673948  | 5.484002432 | 4.15809E-08 | 1.4007E-06  |
| ENSG00000235568.2  | NFAM1         | 83.66076026 | 1.145928885 | 0.208984978 | 5.483307441 | 4.17447E-08 | 1.40431E-06 |
| ENSG00000213846.3  | AC098614.2    | 112.4734807 | 0.603104337 | 0.109999381 | 5.482797537 | 4.18652E-08 | 1.40457E-06 |
| ENSG00000211644.2  | IGLV1-51      | 285.282834  | 1.723417195 | 0.314373455 | 5.482069714 | 0.000000042 | 1.40847E-06 |
| ENSG0000           |               |             |             |             |             |             |             |

## upreg\_DEGs

|                    |              |             |              |             |             |             |             |
|--------------------|--------------|-------------|--------------|-------------|-------------|-------------|-------------|
| ENSG00000075420.8  | FNDC3B       | 1307.844883 | 0.558439287  | 0.102747281 | 5.435076088 | 5.47731E-08 | 1.75938E-06 |
| ENSG000000211663.2 | IGLV3-19     | 353.7923535 | 1.854095152  | 0.341328943 | 5.431989258 | 5.57293E-08 | 1.78549E-06 |
| ENSG00000146592.12 | CREB5        | 54.72800014 | 1.273425372  | 0.234703432 | 5.425678525 | 5.77348E-08 | 1.83792E-06 |
| ENSG00000135862.5  | LAMC1        | 1126.092833 | 0.70295026   | 0.129574653 | 5.425059933 | 5.79351E-08 | 1.84194E-06 |
| ENSG00000104369.4  | JPH1         | 76.96727892 | 0.784582135  | 0.14463499  | 5.4245666   | 5.80953E-08 | 1.84467E-06 |
| ENSG00000111817.12 | DSE          | 334.0305733 | 0.761126395  | 0.140324106 | 5.424060175 | 5.82603E-08 | 1.84756E-06 |
| ENSG00000133687.11 | TMTC1        | 223.1200612 | 0.830222187  | 0.153173528 | 5.420141432 | 5.95519E-08 | 1.88133E-06 |
| ENSG00000267107.2  | AC011526.1   | 18.80132717 | 0.995178209  | 0.183660665 | 5.418570205 | 6.00775E-08 | 1.89553E-06 |
| ENSG00000101187.11 | SLCO4A1      | 53.63338715 | 1.130624681  | 0.208715537 | 5.417060462 | 6.05869E-08 | 1.90918E-06 |
| ENSG00000184164.10 | CRELD2       | 215.437229  | 0.842116697  | 0.155472897 | 5.416485545 | 6.07819E-08 | 1.9129E-06  |
| ENSG00000076706.10 | MCAM         | 261.1252866 | 0.876317042  | 0.161963944 | 5.410568669 | 6.28249E-08 | 1.97221E-06 |
| ENSG00000054938.11 | CHRD12       | 6.583751391 | 3.087631742  | 0.570810417 | 5.409207073 | 6.33044E-08 | 1.98476E-06 |
| ENSG000000072110.9 | ACTN1        | 697.9122069 | 0.683495176  | 0.126390958 | 5.407785389 | 6.38088E-08 | 1.99806E-06 |
| ENSG00000170801.5  | HTRA3        | 55.07270729 | 1.283715883  | 0.237457213 | 5.406093448 | 6.44142E-08 | 2.01448E-06 |
| ENSG00000183722.7  | LHFP         | 103.0398967 | 0.753653502  | 0.139566333 | 5.399966358 | 6.66534E-08 | 2.07929E-06 |
| ENSG00000108001.9  | EBF3         | 4.417553316 | 2.733285507  | 0.506188654 | 5.39973681  | 6.67387E-08 | 2.07934E-06 |
| ENSG00000184014.3  | DENND5A      | 252.5607891 | 0.790444229  | 0.146558985 | 5.393352226 | 6.91552E-08 | 2.13592E-06 |
| ENSG00000157554.14 | ERG          | 76.53604933 | 0.652111914  | 0.120940682 | 5.391997994 | 6.96785E-08 | 2.14941E-06 |
| ENSG00000131477.6  | RAMP2        | 31.45989577 | 0.764348169  | 0.14178176  | 5.391019067 | 7.00592E-08 | 2.15848E-06 |
| ENSG00000108641.10 | B9D1         | 21.50836557 | 0.840409135  | 0.156035714 | 5.386005003 | 0.000000072 | 2.21406E-06 |
| ENSG00000066056.9  | TIE1         | 79.16043873 | 0.743170826  | 0.138116079 | 5.380769782 | 7.4168E-08  | 0.000002271 |
| ENSG00000188897.4  | CTD-3088G3.8 | 16.76007018 | 1.418820283  | 0.263976517 | 5.374797345 | 7.66689E-08 | 2.3361E-06  |
| ENSG00000134317.13 | GRHL1        | 20.99806695 | 1.323746496  | 0.246349253 | 5.373454479 | 7.72423E-08 | 2.3507E-06  |
| ENSG00000070081.11 | NUCB2        | 456.952399  | 0.708732978  | 0.131946727 | 5.371357004 | 7.81463E-08 | 2.3753E-06  |
| ENSG00000032389.8  | TSSC1        | 143.3693329 | 0.399632451  | 0.074453399 | 5.36755149  | 7.98127E-08 | 2.4171E-06  |
| ENSG00000181104.6  | F2R          | 351.4899131 | 0.762534032  | 0.142063074 | 5.367573778 | 7.98029E-08 | 2.4171E-06  |
| ENSG00000138356.9  | AOX1         | 29.39679508 | 1.47597565   | 0.275598619 | 5.355526285 | 8.53077E-08 | 2.5648E-06  |
| ENSG00000026508.12 | CD44         | 1751.723785 | 0.728371989  | 0.136134412 | 5.350388481 | 8.77656E-08 | 2.63551E-06 |
| ENSG00000211934.2  | IGHV1-2      | 180.430431  | 2.12329038   | 0.397050135 | 5.347663156 | 8.90971E-08 | 2.67227E-06 |
| ENSG00000116962.10 | NID1         | 712.1726289 | 0.814912095  | 0.15242511  | 5.346311348 | 8.97647E-08 | 2.68645E-06 |
| ENSG00000135363.7  | LMO2         | 72.05908192 | 0.704872005  | 0.131843728 | 5.346268778 | 8.97859E-08 | 2.68645E-06 |
| ENSG00000147408.10 | CSGALNACT1   | 48.11656956 | 1.108838495  | 0.207439088 | 5.345369114 | 9.0233E-08  | 2.69336E-06 |
| ENSG00000239951.1  | IGKV3-20     | 1086.776104 | 1.6898194305 | 0.316198296 | 5.344160059 | 9.08373E-08 | 2.70815E-06 |
| ENSG00000114450.5  | GNB4         | 202.484094  | 0.660774044  | 0.123664378 | 5.343285212 | 9.1277E-08  | 0.000002718 |
| ENSG00000127507.13 | EMR2         | 97.3548478  | 1.226664978  | 0.229594276 | 5.342750688 | 9.15466E-08 | 2.72277E-06 |
| ENSG00000159216.14 | RUNX1        | 303.1602139 | 0.612603102  | 0.114767045 | 5.33779624  | 9.40831E-08 | 2.79154E-06 |
| ENSG00000184838.10 | PRR16        | 22.51309734 | 1.217722153  | 0.228148737 | 5.337404742 | 9.42864E-08 | 2.79425E-06 |
| ENSG00000211942.2  | IGHV3-13     | 37.94026939 | 2.322189877  | 0.435593842 | 5.331089771 | 9.76251E-08 | 2.88289E-06 |
| ENSG00000126709.10 | IFI6         | 270.4614333 | 1.411455831  | 0.264826006 | 5.329747822 | 9.83492E-08 | 2.90084E-06 |
| ENSG00000188343.8  | FAM92A1      | 34.9121246  | 0.671708996  | 0.126101561 | 5.326730214 | 0.0000001   | 2.94245E-06 |
| ENSG00000104490.13 | NCALD        | 106.6407932 | 0.750113028  | 0.140921663 | 5.322907869 | 1.02121E-07 | 2.99436E-06 |
| ENSG00000152049.5  | KCNE4        | 24.00454764 | 0.972877113  | 0.182835404 | 5.321054293 | 1.03168E-07 | 3.02148E-06 |
| ENSG00000100629.12 | CEP128       | 110.8589866 | 0.812292571  | 0.152662815 | 5.32082793  | 1.03296E-07 | 3.02168E-06 |
| ENSG00000113319.7  | RASGRF2      | 118.2988281 | 0.602356901  | 0.113274735 | 5.317663297 | 1.05108E-07 | 3.06749E-06 |
| ENSG00000253276.1  | CCDC71L      | 256.5440706 | 0.635920857  | 0.119642319 | 5.315183304 | 1.0655E-07  | 3.10229E-06 |
| ENSG00000142405.17 | NLRP1        | 7.203293521 | 1.630962809  | 0.307225104 | 5.308689905 | 1.10416E-07 | 3.20735E-06 |
| ENSG00000135919.8  | SERPINE2     | 143.7757356 | 0.937425124  | 0.176645966 | 5.30680175  | 1.11565E-07 | 0.000003237 |
| ENSG00000074219.9  | TEAD2        | 68.52982977 | 0.563933606  | 0.106395617 | 5.300346203 | 1.15583E-07 | 3.34593E-06 |
| ENSG00000110092.3  | CND1         | 564.1161427 | 0.749744628  | 0.141538122 | 5.297121506 | 1.17642E-07 | 3.3935E-06  |
| ENSG00000232216.1  | IGHV3-43     | 26.53899515 | 2.321122837  | 0.438234561 | 5.296530773 | 0.000000118 | 3.39613E-06 |
| ENSG00000139178.6  | C1RL         | 292.3455887 | 0.399287123  | 0.075392394 | 5.296119443 | 1.18289E-07 | 3.39642E-06 |
| ENSG00000071539.9  | TRIP13       | 49.62058872 | 0.915777786  | 0.172946002 | 5.295165978 | 1.18908E-07 | 3.40633E-06 |
| ENSG00000187955.7  | COL14A1      | 732.881583  | 1.000123558  | 0.188867966 | 5.295358333 | 1.18783E-07 | 3.40633E-06 |
| ENSG00000148926.5  | ADM          | 174.6881911 | 1.336943667  | 0.252862574 | 5.287234268 | 1.2418E-07  | 0.00000355  |
| ENSG00000159423.12 | ALDH4A1      | 26.68144749 | 0.829078512  | 0.15680893  | 5.287189401 | 1.2421E-07  | 0.00000355  |
| ENSG00000134278.10 | SPIRE1       | 104.9289583 | 0.496113585  | 0.093854885 | 5.28596443  | 0.000000125 | 3.56978E-06 |
| ENSG00000116793.11 | PHTF1        | 112.4800662 | 0.516608011  | 0.097772778 | 5.283761215 | 1.26558E-07 | 3.60887E-06 |
| ENSG00000105173.9  | CCNE1        | 32.99975744 | 0.655527046  | 0.124210003 | 5.277570495 | 1.30908E-07 | 3.72011E-06 |
| ENSG00000140678.12 | ITGAX        | 186.9834242 | 1.416247843  | 0.268505058 | 5.274566712 | 1.3307E-07  | 3.77295E-06 |
| ENSG00000134802.13 | SLC43A3      | 73.27678278 | 0.834136141  | 0.158234856 | 5.271506953 | 1.35308E-07 | 3.82334E-06 |
| ENSG00000160932.6  | LY6E         | 154.7320491 | 1.111590483  | 0.21091151  | 5.270411657 | 1.36118E-07 | 3.84186E-06 |
| ENSG00000224959.1  | ACO17002.2   | 3.828461127 | 1.578429465  | 0.299700965 | 5.266681289 | 1.38912E-07 | 3.90743E-06 |
| ENSG00000101916.11 | TLR8         | 121.3663839 | 1.207470459  | 0.229641449 | 5.258068455 | 1.45576E-07 | 4.08566E-06 |
| ENSG00000183853.13 | KIRREL       | 217.1686214 | 0.723048919  | 0.137526601 | 5.257520449 | 0.000000146 | 4.08863E-06 |
| ENSG00000243279.2  | PRAF2        | 16.54939109 | 0.765740149  | 0.145642514 | 5.257669111 | 1.45893E-07 | 4.08863E-06 |
| ENSG00000135679.17 | MDM2         | 1216.904067 | 0.528279035  | 0.100547161 | 5.254042274 | 1.48797E-07 | 0.000004148 |
| ENSG00000248008.2  | DYNLL1-AS1   | 49.75189735 | 0.465794988  | 0.088680535 | 5.252505403 | 0.00000015  | 4.1734E-06  |
| ENSG00000172183.10 | ISG20        | 282.2700292 | 0.903405066  | 0.172023658 | 5.251632694 | 1.50757E-07 | 4.18855E-06 |
| ENSG00000099958.10 | DERL3        | 181.3204657 | 1.175376739  | 0.224213718 | 5.242216009 | 1.58659E-07 | 4.3934E-06  |
| ENSG00000128791.7  | TWSC1        | 320.0566952 | 0.584219512  | 0.111456244 | 5.241693897 | 1.59109E-07 | 0.000004401 |
| ENSG00000145050.11 | MANF         | 300.3185142 | 0.735702275  | 0.140429484 | 5.238944502 | 1.61498E-07 | 4.45218E-06 |
| ENSG00000196208.9  | GREB1        | 12.45383358 | 1.278030663  | 0.244022577 | 5.237345978 | 1.62902E-07 | 0.000004481 |
| ENSG00000204394.8  | VAR5         | 262.3190363 | 0.54102541   | 0.103331439 | 5.235825772 | 1.64249E-07 | 0.000004513 |
| ENSG00000065485.13 | PDIA5        | 178.8914197 | 0.494316341  | 0.094421431 | 5.235213406 | 1.64794E-07 | 4.51805E-06 |
| ENSG00000134602.11 | MST4         | 286.5355412 | 0.542657636  | 0.103655271 | 5.235215064 | 1.64793E-07 | 4.51805E-06 |
| ENSG00000122188.8  | LAX1         | 115.9954599 | 1.304308879  | 0.2491536   | 5.234958995 | 0.000000165 | 4.5193E-06  |
| ENSG00000119630.9  | PGF          | 25.53277073 | 0.992380963  | 0.189689483 | 5.231607705 | 0.000000168 | 0.000004597 |
| ENSG00000229132.2  | EIF4A1P10    | 392.4317068 | 0.488668306  | 0.093440626 | 5.229719939 | 1.69767E-07 | 4.63906E-06 |
| ENSG00000237989.1  | AP001046.5   | 6.123015866 | 1.557899399  | 0.298117305 | 5.225793238 | 1.7341E-07  | 4.73139E-06 |
| ENSG00000179403.10 | VVA1         | 187.6198606 | 0.917910096  | 0.175731435 | 5.223368812 | 1.75697E-07 | 4.78011E-06 |
| ENSG00000075618.13 | FSCN1        | 104.5375941 | 1.001156784  | 0.191727129 | 5.221779461 | 1.77212E-07 | 0.000004804 |
| ENSG00000158055.11 | GRHL3        | 4.262855593 | 2.113283563  | 0.404716517 | 5.221639032 | 1.77346E-07 | 0.000004804 |
| ENSG00000166171.8  | DPDC         | 33.92561932 | 0.73387351   | 0.140605828 | 5.219367645 | 1.79535E-07 | 4.85271E-06 |
| ENSG00000074181.4  | NOTCH3       | 139.4799218 | 0.989868492  | 0.18972299  | 5.21744093  | 1.81412E-07 | 4.88752E-06 |
| ENSG00000143369.10 | ECM1         | 91.38046269 | 0.779255956  | 0.149492302 | 5.212682853 | 1.86129E-07 | 4.99838E-06 |
| ENSG00000137033.7  | IL33         | 154.7779595 | 1.086177061  | 0.20840785  | 5.211785735 | 0.000000187 | 5.0172E-06  |
| ENSG00000065833.7  | ME1          | 155.8112706 | 1.007240315  | 0.193402219 | 5.208008056 | 1.90879E-07 | 5.09682E-06 |
| ENSG00000188910.7  | GJB3         | 46.01329549 | 1.223251527  | 0.234946907 | 5.206501942 | 1.92434E-07 | 0.000005129 |
| ENSG00000129187.10 | DCTD         | 269.8865945 | 0.305821082  | 0.058788943 | 5.202017019 | 1.97137E-07 | 5.23749E-06 |
| ENSG00000142733.10 | MAP3K6       | 89.78089952 | 0.744161351  | 0.143093814 | 5.200513766 | 1.98738E-07 | 5.27441E-06 |
| ENSG00000178752.11 | FAM132B      | 5.604768659 | 1.929072708  | 0.371173016 | 5.197233166 | 2.02277E-07 | 5.35689E-06 |
| ENSG00000087494.11 | PTHLH        | 4.984803111 | 2.102199568  | 0.404850344 | 5.192534966 | 2.0745E-07  | 5.47641E-06 |
| ENSG00000259600.2  | RP11-925D8.3 | 2.903906056 | 5.55083444   | 1.069308297 | 5.191051501 | 2.0911E-07  | 5.51438E-06 |
| ENSG00000153086.9  | ACMSD        | 1.860157945 | 4.601092985  | 0.88643957  | 5.190532033 | 2.09694E-07 | 5.52394E-06 |
| ENSG00000143140.6  | GJA5         | 23.95266541 | 1.419833112  | 0.273865763 | 5.184412594 | 2.16697E-07 | 5.68032E-06 |
| ENSG00000225492.2  |              |             |              |             |             |             |             |

## upreg\_DEGs

|                    |                |             |             |             |             |             |             |
|--------------------|----------------|-------------|-------------|-------------|-------------|-------------|-------------|
| ENSG00000237807.3  | RP11-400K9.4   | 34.31918151 | 1.224902188 | 0.237611021 | 5.155073119 | 2.53532E-07 | 6.46275E-06 |
| ENSG00000184374.2  | COLEC10        | 4.1660422   | 1.79683012  | 0.348598452 | 5.154440907 | 2.54389E-07 | 6.47521E-06 |
| ENSG00000183914.10 | DNAH2          | 6.982604274 | 1.203313658 | 0.233595363 | 5.151273736 | 2.58723E-07 | 6.55871E-06 |
| ENSG00000236438.2  | FAM157A        | 4.437086092 | 1.841404585 | 0.357460955 | 5.151344675 | 2.58625E-07 | 6.55871E-06 |
| ENSG00000148841.11 | ITPRIP         | 73.58316028 | 0.878119313 | 0.170570244 | 5.14813893  | 2.63084E-07 | 6.65569E-06 |
| ENSG00000183010.12 | PYCR1          | 212.5992693 | 0.906848865 | 0.176200004 | 5.146701724 | 2.65106E-07 | 6.67971E-06 |
| ENSG00000196839.8  | ADA            | 35.28026286 | 1.065074281 | 0.20693934  | 5.146794612 | 0.000000265 | 6.67971E-06 |
| ENSG00000160181.4  | TFF2           | 15.16208651 | 2.468354238 | 0.480064251 | 5.141716412 | 2.7224E-07  | 6.84559E-06 |
| ENSG00000173868.7  | PHOSPHO1       | 2.874212863 | 2.503500638 | 0.487372339 | 5.136731071 | 2.79559E-07 | 7.00839E-06 |
| ENSG0000004468.8   | CD38           | 246.7904302 | 1.147422739 | 0.223431166 | 5.135464135 | 2.81449E-07 | 7.04867E-06 |
| ENSG00000199377.1  | RNU5F-1        | 8.846647577 | 2.125135542 | 0.413930925 | 5.134034236 | 2.83596E-07 | 7.09533E-06 |
| ENSG00000164220.6  | F2RL2          | 38.99775883 | 1.493841893 | 0.290993255 | 5.133596293 | 2.84257E-07 | 7.10472E-06 |
| ENSG00000153250.13 | RBMS1          | 225.9866626 | 0.680138544 | 0.132511898 | 5.132660206 | 2.85675E-07 | 0.000007133 |
| ENSG00000173557.10 | C2orf70        | 2.978458671 | 1.694918076 | 0.330265081 | 5.131992978 | 2.8669E-07  | 0.000007144 |
| ENSG00000165124.13 | SVEP1          | 294.9521571 | 0.943538091 | 0.183892249 | 5.130929104 | 2.88315E-07 | 7.17733E-06 |
| ENSG00000117594.5  | HSD11B1        | 10.3086091  | 1.930633418 | 0.376838636 | 5.123236401 | 3.00335E-07 | 7.42458E-06 |
| ENSG00000103353.11 | UBFD1          | 346.3051116 | 0.311395723 | 0.060924656 | 5.111160922 | 3.20185E-07 | 7.86064E-06 |
| ENSG00000147689.12 | FAM83A         | 11.6107094  | 2.305351666 | 0.4512052   | 5.109319811 | 3.23321E-07 | 0.000007922 |
| ENSG00000137507.7  | LRRC32         | 90.95049533 | 0.832040839 | 0.162890824 | 5.107966284 | 3.25645E-07 | 7.94765E-06 |
| ENSG00000198019.8  | FCGR1B         | 4.881673218 | 2.904798529 | 0.568640839 | 5.10831852  | 0.000000325 | 7.94765E-06 |
| ENSG00000172817.3  | CYP7B1         | 52.62836945 | 0.99533786  | 0.194886624 | 5.107266158 | 3.26853E-07 | 7.96933E-06 |
| ENSG00000111432.4  | FZD10          | 6.873995619 | 1.145989391 | 0.224524902 | 5.104063642 | 3.32436E-07 | 8.07383E-06 |
| ENSG00000061918.8  | GUCY1B3        | 77.76841112 | 1.137213798 | 0.222987629 | 5.099896366 | 3.3984E-07  | 8.22154E-06 |
| ENSG00000175538.6  | KCNE3          | 507.4637164 | 0.686848246 | 0.134694099 | 5.099319516 | 3.40877E-07 | 8.23064E-06 |
| ENSG00000240563.1  | L1TD1          | 148.2838166 | 1.900169349 | 0.372824233 | 5.096688942 | 3.45645E-07 | 8.3296E-06  |
| ENSG00000240864.1  | IGKV1-16       | 89.46198125 | 1.785851778 | 0.350488285 | 5.095325159 | 3.48143E-07 | 8.3736E-06  |
| ENSG00000272327.1  | RP11-1002K11.1 | 45.70322203 | 1.057894344 | 0.207637914 | 5.0948997   | 3.48926E-07 | 8.38085E-06 |
| ENSG00000197930.8  | ERO1L          | 1155.75573  | 0.557912394 | 0.109533088 | 5.093551237 | 3.51418E-07 | 8.42794E-06 |
| ENSG00000092621.7  | PHGDH          | 32.38345256 | 0.979780876 | 0.192456746 | 5.090914699 | 3.5634E-07  | 8.52728E-06 |
| ENSG00000104522.11 | TSTA3          | 410.7935154 | 0.706399592 | 0.138752559 | 5.091074328 | 0.000000356 | 8.52728E-06 |
| ENSG00000149131.11 | SERPING1       | 374.0809177 | 1.120268541 | 0.220058201 | 5.090782954 | 3.56588E-07 | 8.52728E-06 |
| ENSG00000137962.8  | ARHGAP29       | 154.0123469 | 0.727331025 | 0.142880814 | 5.090473692 | 3.5717E-07  | 0.000008533 |
| ENSG00000163221.7  | S100A12        | 12.4618603  | 5.089185543 | 0.999813777 | 5.090133442 | 3.57812E-07 | 8.54014E-06 |
| ENSG00000128274.11 | A4GALT         | 34.57200555 | 0.978504757 | 0.192284379 | 5.08884166  | 3.60257E-07 | 8.58205E-06 |
| ENSG00000164038.10 | SLC9B2         | 35.95079304 | 0.83420514  | 0.16397107  | 5.087514148 | 3.62787E-07 | 8.63406E-06 |
| ENSG00000120149.7  | MSX2           | 13.06739421 | 1.320669759 | 0.259606145 | 5.087205308 | 3.63378E-07 | 8.63987E-06 |
| ENSG00000064932.11 | SBNO2          | 482.1123575 | 0.953589169 | 0.187457954 | 5.086949627 | 3.63868E-07 | 8.64326E-06 |
| ENSG00000198734.6  | F5             | 31.25095824 | 1.032920897 | 0.203201801 | 5.083227085 | 3.71076E-07 | 8.79767E-06 |
| ENSG00000154856.8  | APCDD1         | 94.73956239 | 0.840463571 | 0.165365348 | 5.082464862 | 3.72568E-07 | 8.82466E-06 |
| ENSG00000173706.8  | HEG1           | 366.0566157 | 0.70660687  | 0.139090299 | 5.080202413 | 0.000000377 | 8.91345E-06 |
| ENSG00000188015.5  | S100A3         | 3.14157883  | 2.003934894 | 0.394566544 | 5.078826182 | 3.79774E-07 | 8.96973E-06 |
| ENSG00000166250.7  | CLMP           | 135.3233085 | 0.798382409 | 0.157241784 | 5.077418923 | 3.82597E-07 | 9.01928E-06 |
| ENSG00000143217.7  | PVRL4          | 33.07485093 | 0.999427818 | 0.196856531 | 5.07693503  | 3.83572E-07 | 9.03372E-06 |
| ENSG00000137868.14 | STRA6          | 2.989757389 | 2.921109807 | 0.575454059 | 5.076182475 | 3.85093E-07 | 9.0529E-06  |
| ENSG00000184867.9  | ARMCX2         | 78.2827088  | 0.577250421 | 0.113720268 | 5.076055759 | 3.8535E-07  | 9.0529E-06  |
| ENSG00000225485.3  | ARHGAP23       | 67.26261648 | 0.92374919  | 0.181983934 | 5.075993078 | 3.85477E-07 | 9.0529E-06  |
| ENSG00000096006.7  | CRISP3         | 2.362056081 | 3.643481959 | 0.718131656 | 5.073557099 | 3.90447E-07 | 0.000009161 |
| ENSG00000224041.2  | IGKV3D-15      | 14.1993796  | 1.95999157  | 0.386382489 | 5.072671842 | 3.92269E-07 | 0.000009195 |
| ENSG00000187908.11 | DNMT3          | 10724.85741 | 2.088031349 | 0.411681745 | 5.07195516  | 3.93749E-07 | 9.22106E-06 |
| ENSG00000172985.8  | SH3RF3         | 52.44447548 | 0.716907241 | 0.14135437  | 5.071701997 | 3.94273E-07 | 9.22467E-06 |
| ENSG00000164070.7  | HSPA4L         | 82.63779042 | 0.958922399 | 0.189185803 | 5.06868056  | 4.00583E-07 | 9.34593E-06 |
| ENSG00000111331.8  | OAS3           | 497.1236801 | 1.116681815 | 0.220327479 | 5.068282076 | 4.01422E-07 | 9.35675E-06 |
| ENSG00000100979.10 | PLTP           | 212.2936615 | 0.799230391 | 0.157704281 | 5.067905495 | 4.02217E-07 | 9.36012E-06 |
| ENSG00000108797.1  | CNTNAP1        | 36.50043918 | 0.897116627 | 0.177020898 | 5.067857165 | 4.02319E-07 | 9.36012E-06 |
| ENSG00000271225.1  | RP11-460N11.3  | 8.012583001 | 1.746088331 | 0.344938142 | 5.062033209 | 4.14809E-07 | 9.63269E-06 |
| ENSG00000117525.9  | F3             | 618.4175515 | 0.650323862 | 0.128812403 | 5.048612143 | 0.000000445 | 1.02821E-05 |
| ENSG00000095794.15 | CREM           | 96.12044883 | 0.605276483 | 0.119937024 | 5.046619155 | 4.49696E-07 | 1.03655E-05 |
| ENSG00000112242.10 | E2F3           | 148.9283403 | 0.461855534 | 0.091541555 | 5.045310122 | 4.52786E-07 | 0.000010409 |
| ENSG00000155304.4  | HSPA13         | 457.634329  | 0.543378381 | 0.107696037 | 5.045481669 | 4.5238E-07  | 0.000010409 |
| ENSG00000266554.1  | RP11-527H14.2  | 8.89551511  | 1.352560998 | 0.268084025 | 5.045287568 | 4.5284E-07  | 0.000010409 |
| ENSG00000068438.10 | FTSJ1          | 150.2554981 | 0.43473288  | 0.086217961 | 5.042254245 | 4.60079E-07 | 1.05657E-05 |
| ENSG00000128383.8  | AOBEC3A        | 16.91363481 | 2.968347269 | 0.589110355 | 5.038694782 | 4.68717E-07 | 1.07254E-05 |
| ENSG00000144867.7  | SRPRB          | 429.2971831 | 0.499556344 | 0.099166247 | 5.037564271 | 4.71493E-07 | 1.07583E-05 |
| ENSG00000182199.6  | SHMT2          | 316.3808184 | 0.42234842  | 0.08383718  | 5.037722151 | 4.71105E-07 | 1.07583E-05 |
| ENSG00000178860.8  | MSC            | 24.73741779 | 1.051625786 | 0.209028179 | 5.031023998 | 4.87867E-07 | 1.10812E-05 |
| ENSG00000138801.4  | PAPSS1         | 300.5603169 | 0.400603138 | 0.0797084   | 5.025858515 | 5.01185E-07 | 1.13278E-05 |
| ENSG00000264868.1  | CTB-167B5.2    | 17.30846079 | 1.173440026 | 0.233640049 | 5.022426729 | 5.10227E-07 | 1.14789E-05 |
| ENSG00000154133.10 | ROBO4          | 43.23741003 | 0.839976265 | 0.167311844 | 5.020423205 | 5.15578E-07 | 1.15837E-05 |
| ENSG00000198959.7  | TGM2           | 1260.55086  | 1.177958001 | 0.234688634 | 5.019237527 | 5.1877E-07  | 0.000011645 |
| ENSG00000087077.7  | TRIP6          | 109.2454071 | 0.772877107 | 0.154002502 | 5.018600967 | 5.20491E-07 | 1.16731E-05 |
| ENSG00000162702.7  | ZNF281         | 272.2290439 | 0.375600622 | 0.074848952 | 5.018114625 | 5.2181E-07  | 1.16921E-05 |
| ENSG00000143248.8  | RG55           | 979.887766  | 0.846222797 | 0.168673156 | 5.01693818  | 0.000000525 | 1.17533E-05 |
| ENSG00000171017.6  | LRRC8E         | 15.69102104 | 1.133468756 | 0.225954439 | 5.016359757 | 5.26597E-07 | 1.17782E-05 |
| ENSG00000174899.6  | C3orf55        | 2.054862375 | 2.085235664 | 0.415819912 | 5.014756641 | 0.000000531 | 1.18555E-05 |
| ENSG00000211933.2  | IGHV6-1        | 67.88573937 | 1.734876279 | 0.346035244 | 5.013582601 | 5.34258E-07 | 1.19067E-05 |
| ENSG00000092853.9  | CLSPN          | 80.91739577 | 0.813177004 | 0.162317188 | 5.009802187 | 5.4486E-07  | 1.21213E-05 |
| ENSG00000143384.8  | MCL1           | 3913.837926 | 0.483047816 | 0.096451755 | 5.008180656 | 5.49469E-07 | 1.22073E-05 |
| ENSG00000071575.7  | TRIB2          | 208.5327919 | 0.90368089  | 0.180451809 | 5.007879352 | 5.5033E-07  | 1.22103E-05 |
| ENSG00000061656.5  | SPAG4          | 16.26971337 | 1.204787625 | 0.24077637  | 5.003761898 | 5.62222E-07 | 1.24508E-05 |
| ENSG00000180879.9  | SSR4           | 963.9466171 | 0.556775431 | 0.111274803 | 5.003607423 | 5.62673E-07 | 1.24508E-05 |
| ENSG00000067955.9  | CBFB           | 349.2729803 | 0.486921735 | 0.097317855 | 5.003416208 | 5.63232E-07 | 1.24521E-05 |
| ENSG00000104972.10 | LILRB1         | 73.20123696 | 1.025845079 | 0.205074179 | 5.00231226  | 5.66467E-07 | 1.25125E-05 |
| ENSG00000163378.9  | EOGT           | 193.3109173 | 0.460433544 | 0.092060889 | 5.001402341 | 5.69148E-07 | 1.25606E-05 |
| ENSG00000152669.8  | CCNT1          | 6.492795943 | 2.078005483 | 0.415508946 | 5.001108895 | 0.000000557 | 1.25612E-05 |
| ENSG00000169855.15 | ROBO1          | 462.5362073 | 0.682089816 | 0.136389262 | 5.001052164 | 5.70183E-07 | 1.25612E-05 |
| ENSG00000088340.11 | FER1L4         | 69.94616378 | 1.419483059 | 0.284041326 | 4.997452595 | 5.80926E-07 | 1.27752E-05 |
| ENSG00000172243.13 | CLEC7A         | 148.5795817 | 0.838613824 | 0.167828122 | 4.996861161 | 5.8271E-07  | 0.00001279  |
| ENSG00000196118.7  | C16orf93       | 13.12232029 | 0.771159852 | 0.154333237 | 4.996719234 | 5.83139E-07 | 0.00001279  |
| ENSG00000214212.4  | C19orf38       | 17.87092766 | 1.166499866 | 0.233468881 | 4.996382657 | 5.84157E-07 | 1.28011E-05 |
| ENSG00000077232.12 | DNAJC10        | 1710.426678 | 0.540444292 | 0.108177167 | 4.995918312 | 5.85564E-07 | 0.000012814 |
| ENSG00000079215.9  | SLC1A3         | 40.84819405 | 1.762874892 | 0.352867937 | 4.995848893 | 5.85775E-07 | 0.000012814 |
| ENSG00000108932.7  | SLC16A6        | 23.29564803 | 1.219879588 | 0.244187854 | 4.995660376 | 5.86348E-07 | 1.28152E-05 |
| ENSG00000099866.10 | MADCAM1        | 40.61628241 | 1.459456088 | 0.292219586 | 4.994381487 | 5.90246E-07 | 1.28891E-05 |
| ENSG00000171388.9  | APLN           | 6.988151579 | 1.57001509  | 0.31464546  | 4.989791021 | 6.04446E-07 | 1.31531E-05 |
| ENSG00000134590.9  | FAM127A        | 97.32929734 | 0.550907894 | 0.110468999 | 4.986990927 | 6.13269E-07 | 1.33218E-05 |
| ENSG00000151       |                |             |             |             |             |             |             |

## upreg\_DEGs

|                     |               |             |             |             |             |             |             |
|---------------------|---------------|-------------|-------------|-------------|-------------|-------------|-------------|
| ENSG00000108946.10  | PRKAR1A       | 1612.965926 | 0.399077696 | 0.080483463 | 4.958505546 | 7.10375E-07 | 1.50503E-05 |
| ENSG00000196754.6   | S100A2        | 2.514374544 | 2.045856171 | 0.41285337  | 4.955406253 | 7.21793E-07 | 1.52532E-05 |
| ENSG00000096968.8   | JAK2          | 546.7679679 | 0.620720106 | 0.125285518 | 4.954444195 | 7.25373E-07 | 1.53159E-05 |
| ENSG00000211965.2   | IGHV3-49      | 99.2094005  | 1.993379963 | 0.402418467 | 4.953500222 | 7.28903E-07 | 1.53644E-05 |
| ENSG00000110328.5   | GALNT18       | 37.9511473  | 0.86806942  | 0.175327618 | 4.951127665 | 7.37847E-07 | 1.55135E-05 |
| ENSG00000163565.14  | IFI16         | 439.3781506 | 0.757056421 | 0.153016868 | 4.947535718 | 7.51589E-07 | 1.57625E-05 |
| ENSG00000164116.12  | GUCY1A3       | 227.5597476 | 1.002733111 | 0.202707189 | 4.94670719  | 7.54794E-07 | 1.58053E-05 |
| ENSG00000197622.8   | CDC42SE1      | 878.4509392 | 0.409628849 | 0.082812407 | 4.94646714  | 7.55725E-07 | 1.58093E-05 |
| ENSG00000250899.3   | RP11-253E3.3  | 12.25173638 | 0.849727235 | 0.171900527 | 4.943133404 | 7.68768E-07 | 1.60417E-05 |
| ENSG00000167476.6   | JSRP1         | 9.143392468 | 1.658834293 | 0.335653783 | 4.942099207 | 7.72859E-07 | 0.0000161   |
| ENSG00000140545.10  | MFGES         | 163.6222384 | 0.848739432 | 0.171770933 | 4.941112087 | 7.76782E-07 | 1.61682E-05 |
| ENSG00000170379.15  | FAM115C       | 31.53126554 | 0.915712547 | 0.185354674 | 4.94032617  | 7.7992E-07  | 0.00001622  |
| ENSG00000134193.10  | REG4          | 4716.59179  | 1.668408152 | 0.337750637 | 4.939763161 | 7.82175E-07 | 1.62533E-05 |
| ENSG00000182118.5   | FAM89A        | 20.32093783 | 0.903189719 | 0.182882077 | 4.938645345 | 7.86671E-07 | 1.63271E-05 |
| ENSG00000188313.8   | PLSCR1        | 755.9352798 | 0.549288897 | 0.111273046 | 4.936405666 | 7.95755E-07 | 1.64942E-05 |
| ENSG00000172156.3   | CCL11         | 148.5973297 | 1.381830415 | 0.280239458 | 4.930891699 | 8.18551E-07 | 1.69244E-05 |
| ENSG00000028116.12  | VRK2          | 184.8692779 | 0.421191495 | 0.085451331 | 4.929022065 | 8.26422E-07 | 1.70346E-05 |
| ENSG00000011426.6   | ANLN          | 277.6821441 | 0.799099444 | 0.162134691 | 4.928614828 | 8.28147E-07 | 0.000017052 |
| ENSG00000174837.10  | EMR1          | 44.8073346  | 1.16828708  | 0.237051007 | 4.92842067  | 0.00000829  | 1.70549E-05 |
| ENSG00000243290.1   | IGKV1-12      | 53.70309066 | 1.688993983 | 0.342717446 | 4.928240451 | 8.29735E-07 | 1.70565E-05 |
| ENSG00000112576.8   | CCND3         | 290.1076173 | 0.483938209 | 0.098207821 | 4.927695213 | 8.32053E-07 | 0.00001709  |
| ENSG00000067177.10  | PHKA1         | 59.65239729 | 0.822375634 | 0.166928874 | 4.92650322  | 8.37142E-07 | 1.71804E-05 |
| ENSG00000150510.11  | FAM124A       | 12.55102949 | 1.063595977 | 0.215902551 | 4.926277962 | 8.38108E-07 | 0.000017186 |
| ENSG00000171385.5   | KCND3         | 166.676381  | 1.235110875 | 0.250730293 | 4.926053647 | 8.3907E-07  | 1.71916E-05 |
| ENSG00000132622.6   | HSPA12B       | 22.56470079 | 0.840206512 | 0.170597392 | 4.925084159 | 8.43241E-07 | 1.72629E-05 |
| ENSG00000114353.12  | GNAI2         | 721.5830972 | 0.496315284 | 0.100779757 | 4.924751727 | 8.44675E-07 | 0.000017278 |
| ENSG00000198873.10  | GRK5          | 223.7492165 | 0.51605589  | 0.104798138 | 4.924284897 | 8.46694E-07 | 1.73051E-05 |
| ENSG00000119777.14  | TMEM214       | 435.4311242 | 0.376781535 | 0.076585303 | 4.919762951 | 8.66491E-07 | 1.76807E-05 |
| ENSG00000146555.14  | SDK1          | 92.07857202 | 0.858184377 | 0.174524827 | 4.917262438 | 8.77629E-07 | 1.78933E-05 |
| ENSG00000174950.6   | CD164L2       | 0.967139757 | 2.427790859 | 0.493781268 | 4.916733409 | 0.00000088  | 0.000017927 |
| ENSG00000113273.11  | ARSB          | 213.9477913 | 0.436802261 | 0.088875777 | 4.914750411 | 0.00000889  | 1.80946E-05 |
| ENSG00000166148.2   | AVPR1A        | 3.921156485 | 1.437077934 | 0.292513978 | 4.912852187 | 8.97609E-07 | 1.82558E-05 |
| ENSG00000170909.9   | OSCAR         | 7.47109894  | 1.471185988 | 0.299781513 | 4.907527399 | 9.22318E-07 | 1.86972E-05 |
| ENSG00000100522.4   | GNPNAT1       | 616.1335152 | 0.617432878 | 0.12585372  | 4.905956521 | 9.29731E-07 | 1.88322E-05 |
| ENSG00000130558.14  | OLFM1         | 62.77335381 | 0.822429059 | 0.167662008 | 4.905279794 | 9.32943E-07 | 1.88665E-05 |
| ENSG000000011465.12 | DCN           | 1519.352529 | 0.81810499  | 0.166808191 | 4.904465338 | 9.36822E-07 | 1.89296E-05 |
| ENSG00000118655.4   | DCLRE1B       | 69.86456111 | 0.407333102 | 0.083110736 | 4.901088829 | 9.53069E-07 | 1.91956E-05 |
| ENSG00000152413.10  | HOMER1        | 35.22452501 | 0.741927278 | 0.151393908 | 4.900641567 | 9.55242E-07 | 1.92238E-05 |
| ENSG00000266970.1   | RP11-806H10.4 | 0.788272348 | 2.717651689 | 0.554760274 | 4.898785683 | 9.64308E-07 | 1.93749E-05 |
| ENSG00000204020.5   | LIPN          | 0.899940972 | 3.246418092 | 0.662770283 | 4.898255359 | 9.66913E-07 | 1.94116E-05 |
| ENSG00000163874.8   | ZC3H12A       | 279.7258005 | 0.915523157 | 0.186930198 | 4.89767392  | 9.69778E-07 | 1.94377E-05 |
| ENSG00000008516.12  | MMP25         | 61.91160519 | 1.232789607 | 0.251871746 | 4.894513292 | 9.85493E-07 | 1.97051E-05 |
| ENSG00000026751.12  | SLAMF7        | 411.7248781 | 0.948201174 | 0.193756383 | 4.893780312 | 9.89173E-07 | 1.97628E-05 |
| ENSG00000218809.1   | RP1-229K20.5  | 0.518958082 | 4.59382151  | 0.938759522 | 4.893501907 | 9.90574E-07 | 1.97749E-05 |
| ENSG00000123130.12  | ACOT9         | 196.4394508 | 0.404346723 | 0.082655939 | 4.891925821 | 9.98541E-07 | 0.000019918 |
| ENSG00000175792.7   | RUVBL1        | 159.1127208 | 0.50683031  | 0.103665309 | 4.889102403 | 0.000001013 | 2.01896E-05 |
| ENSG00000215533.4   | LINC00189     | 2.590298325 | 2.074441997 | 0.424597796 | 4.885663604 | 1.03081E-06 | 2.05124E-05 |
| ENSG00000103222.14  | ABCC1         | 329.5221665 | 0.60592719  | 0.124032526 | 4.885228178 | 1.03309E-06 | 2.05386E-05 |
| ENSG00000197442.8   | MAP3K5        | 480.51601   | 0.358149854 | 0.073320011 | 4.884749073 | 1.03561E-06 | 2.05585E-05 |
| ENSG00000169896.12  | ITGAM         | 113.7753535 | 0.999962518 | 0.204772716 | 4.883280048 | 1.04336E-06 | 2.06629E-05 |
| ENSG00000139318.7   | DUSP6         | 682.2825121 | 0.612417924 | 0.125462086 | 4.881298757 | 1.05389E-06 | 0.000020855 |
| ENSG00000123374.6   | CDK2          | 185.3737103 | 0.323843945 | 0.066436988 | 4.874452544 | 1.09111E-06 | 2.14719E-05 |
| ENSG00000197632.4   | SERPIN2       | 1.40837159  | 3.351942419 | 0.68788919  | 4.872794147 | 1.10031E-06 | 2.16359E-05 |
| ENSG0000011912.14   | NCOA7         | 706.1064932 | 0.787667313 | 0.161729472 | 4.870276909 | 1.11442E-06 | 2.18788E-05 |
| ENSG00000139618.10  | BRCA2         | 258.8394355 | 0.57300623  | 0.117664771 | 4.869819809 | 0.000001117 | 2.19122E-05 |
| ENSG00000125657.3   | TNFSF9        | 8.28159808  | 1.88700771  | 0.38773695  | 4.86672139  | 1.13465E-06 | 2.22234E-05 |
| ENSG00000137575.7   | SDCBP         | 1029.106889 | 0.575879067 | 0.118355324 | 4.865679448 | 1.14064E-06 | 2.23232E-05 |
| ENSG00000180739.12  | S1PR5         | 2.855348785 | 1.574195875 | 0.323713947 | 4.862922617 | 1.15665E-06 | 0.000022601 |
| ENSG00000151694.8   | ADAM17        | 336.6411588 | 0.271768665 | 0.055899753 | 4.861714964 | 1.16373E-06 | 2.27192E-05 |
| ENSG00000064666.10  | CNN2          | 469.9825601 | 0.771411805 | 0.158769161 | 4.858700515 | 1.18159E-06 | 2.29852E-05 |
| ENSG00000226238.2   | CTA-217C2.1   | 30.12300824 | 0.608283753 | 0.125195896 | 4.858655687 | 1.18185E-06 | 2.29852E-05 |
| ENSG00000064102.10  | ASUN          | 183.0478806 | 0.324053086 | 0.06671081  | 4.857579812 | 1.18829E-06 | 2.30384E-05 |
| ENSG00000211632.2   | IGKV3D-11     | 4.958130054 | 1.963957773 | 0.404387692 | 4.856621038 | 1.19406E-06 | 2.31322E-05 |
| ENSG00000119699.3   | TGFB3         | 42.90370321 | 0.88785939  | 0.182829699 | 4.856209877 | 1.19654E-06 | 2.31622E-05 |
| ENSG00000183486.8   | MX2           | 188.0605737 | 0.784303907 | 0.161628199 | 4.852519007 | 0.000001219 | 2.300023561 |
| ENSG00000112249.9   | ASCC3         | 1228.421343 | 0.392796414 | 0.080994229 | 4.849684002 | 1.23658E-06 | 2.38078E-05 |
| ENSG00000243649.4   | CFB           | 185.4056719 | 1.322206801 | 0.272924481 | 4.844588498 | 1.26874E-06 | 2.43704E-05 |
| ENSG00000188906.9   | LRRK2         | 344.0723423 | 1.199629598 | 0.247735412 | 4.842382405 | 1.28292E-06 | 2.45858E-05 |
| ENSG00000189067.8   | LITAF         | 1297.285611 | 0.719927485 | 0.148690786 | 4.841776028 | 1.28684E-06 | 0.000024642 |
| ENSG00000134824.9   | FADS2         | 152.3323413 | 1.314356127 | 0.271525526 | 4.840635606 | 1.29425E-06 | 2.47647E-05 |
| ENSG00000172031.6   | EPHX4         | 2.566649109 | 1.76606837  | 0.364926582 | 4.83951693  | 1.30155E-06 | 2.48854E-05 |
| ENSG00000159231.5   | CBR3          | 20.90808937 | 1.158539718 | 0.23940027  | 4.839341725 | 1.3027E-06  | 2.48882E-05 |
| ENSG00000181026.13  | AEN           | 182.7242348 | 0.62088108  | 0.128376298 | 4.836415224 | 0.000001322 | 2.51122E-05 |
| ENSG00000198785.4   | GRIN3A        | 26.6345775  | 1.68460751  | 0.348379617 | 4.835551307 | 1.32777E-06 | 2.51932E-05 |
| ENSG00000163762.2   | TM4SF18       | 59.84597669 | 0.695610906 | 0.143868262 | 4.835054634 | 1.33109E-06 | 0.000025237 |
| ENSG00000259261.2   | IGHV4OR15-8   | 18.02826466 | 2.60546377  | 0.538912916 | 4.834665663 | 1.3337E-06  | 2.52543E-05 |
| ENSG00000085265.6   | FCN1          | 35.38444768 | 2.304491376 | 0.476763846 | 4.83361185  | 1.34078E-06 | 0.000025305 |
| ENSG00000142156.10  | COL6A1        | 1142.121256 | 0.961277716 | 0.198939439 | 4.832011801 | 1.3516E-06  | 2.54707E-05 |
| ENSG00000204516.5   | MICB          | 59.54177663 | 0.824807995 | 0.170848978 | 4.827702245 | 1.38117E-06 | 0.000025969 |
| ENSG00000259401.1   | RP11-566K19.8 | 7.087951313 | 0.963267721 | 0.199556082 | 4.827052692 | 1.38568E-06 | 2.60341E-05 |
| ENSG00000062716.6   | VMP1          | 2441.251713 | 0.63277802  | 0.131121817 | 4.825878992 | 1.39387E-06 | 2.61485E-05 |
| ENSG00000184985.12  | SORCS2        | 30.96808698 | 1.006503857 | 0.208769095 | 4.821134361 | 1.42744E-06 | 2.66978E-05 |
| ENSG00000167995.11  | BEST1         | 26.93326902 | 1.06178126  | 0.220250453 | 4.820790352 | 1.42991E-06 | 2.67238E-05 |
| ENSG00000155307.13  | SAMSN1        | 228.134947  | 1.047709139 | 0.217362008 | 4.820111618 | 1.43478E-06 | 2.67947E-05 |
| ENSG00000153317.10  | ASAP1         | 274.8779645 | 0.509793385 | 0.105773129 | 4.819687099 | 1.43784E-06 | 2.68116E-05 |
| ENSG00000124256.10  | ZBP1          | 97.34597996 | 1.13729353  | 0.236034235 | 4.818341419 | 1.44757E-06 | 2.69728E-05 |
| ENSG00000070669.12  | ASNS          | 147.9669969 | 0.589269674 | 0.122326742 | 4.817177849 | 0.000001456 | 0.00002709  |
| ENSG00000223722.2   | RP11-467L13.5 | 4.985707758 | 1.4197289   | 0.294720027 | 4.817212167 | 1.45578E-06 | 2.71689E-05 |
| ENSG00000168062.5   | BATF2         | 158.1253446 | 1.26932109  | 0.263526761 | 4.816668661 | 1.45975E-06 | 2.71389E-05 |
| ENSG00000086548.8   | CEACAM6       | 4829.551011 | 1.328014605 | 0.275762676 | 4.815788074 | 1.4662E-06  | 2.71689E-05 |
| ENSG00000196230.8   | TUBB          | 2190.247444 | 0.42781807  | 0.088832784 | 4.815993018 | 1.4647E-06  | 2.71689E-05 |
| ENSG00000169908.6   | TM4SF1        | 393.0072468 | 0.793124882 | 0.164800474 | 4.81263714  | 1.48952E-06 | 2.75483E-05 |
| ENSG00000160013.4   | PTGIR         | 10.87949142 | 1.071938059 | 0.222803501 | 4.811136519 | 1.50074E-06 | 2.77354E-05 |
| ENSG00000182718.12  | ANXA2         | 1806.093097 | 0.596185458 | 0.123917422 | 4.810902051 | 1.50251E-06 | 2.77473E-05 |
| ENSG00000168917.8   | SLC35G2       | 10.41832643 | 0.917367369 | 0.190790573 | 4.808242652 | 1.52263E-06 | 2.80565E-05 |



## upreg\_DEGs

|                    |                |             |             |             |             |             |             |
|--------------------|----------------|-------------|-------------|-------------|-------------|-------------|-------------|
| ENSG00000138175.8  | ARL3           | 60.18683019 | 0.452363433 | 0.094982801 | 4.762582593 | 1.91131E-06 | 3.41321E-05 |
| ENSG00000101307.11 | SIRPB1         | 20.45125282 | 1.348148221 | 0.283100318 | 4.762086574 | 0.000001916 | 3.41916E-05 |
| ENSG00000134107.4  | BHLHE40        | 463.6623414 | 0.847494983 | 0.1781786   | 4.756435299 | 1.97041E-06 | 3.50368E-05 |
| ENSG00000134109.6  | EDEM1          | 1075.215116 | 0.449644801 | 0.09456461  | 4.754895086 | 1.98549E-06 | 3.52294E-05 |
| ENSG00000186283.9  | TOR3A          | 222.8021172 | 0.430781699 | 0.090651463 | 4.752065612 | 2.01349E-06 | 3.56753E-05 |
| ENSG00000125821.7  | DTD1           | 110.9752575 | 0.404281854 | 0.085121113 | 4.749489726 | 2.03931E-06 | 3.60814E-05 |
| ENSG00000101670.7  | LIPG           | 225.8530304 | 0.826638627 | 0.174121701 | 4.747476173 | 2.05971E-06 | 3.63906E-05 |
| ENSG00000077514.4  | POLD3          | 283.3940312 | 0.49675459  | 0.104650979 | 4.746774439 | 2.06686E-06 | 3.64524E-05 |
| ENSG00000143507.13 | DUSP10         | 79.70860311 | 0.705859588 | 0.148705256 | 4.746702338 | 2.0676E-06  | 3.64524E-05 |
| ENSG00000182463.11 | TSHZ2          | 89.4081857  | 0.860465831 | 0.181282644 | 4.746542805 | 2.06923E-06 | 3.64553E-05 |
| ENSG00000105339.6  | DENND3         | 289.6304301 | 0.758840381 | 0.15998733  | 4.743127968 | 2.10443E-06 | 3.70493E-05 |
| ENSG00000007171.12 | NOS2           | 828.558588  | 1.906599493 | 0.402057495 | 4.74210658  | 2.11507E-06 | 3.71578E-05 |
| ENSG00000188677.10 | PARVB          | 82.89320969 | 0.701095061 | 0.147884963 | 4.740813704 | 2.12862E-06 | 3.73694E-05 |
| ENSG00000180828.1  | BHLHE22        | 10.67352356 | 1.29974238  | 0.274205106 | 4.740037113 | 2.13679E-06 | 3.74864E-05 |
| ENSG00000011105.7  | TSPAN9         | 97.46735872 | 0.615075528 | 0.129807992 | 4.738348682 | 2.15467E-06 | 3.77469E-05 |
| ENSG00000078237.4  | C12orf5        | 76.37717056 | 0.768716636 | 0.162251129 | 4.737819953 | 2.1603E-06  | 3.78189E-05 |
| ENSG00000241839.5  | PLEKHO2        | 212.5382016 | 0.691149963 | 0.14588782  | 4.737543984 | 2.16324E-06 | 3.78438E-05 |
| ENSG00000085514.11 | PILRA          | 42.00228032 | 1.198265883 | 0.253043205 | 4.735420108 | 0.000002186 | 3.81084E-05 |
| ENSG00000103742.7  | IGDCC4         | 46.20706173 | 1.05715359  | 0.223237333 | 4.73555914  | 2.18452E-06 | 3.81084E-05 |
| ENSG00000138180.11 | CEP55          | 165.189438  | 0.810656559 | 0.171254101 | 4.733647562 | 2.20521E-06 | 3.84159E-05 |
| ENSG00000272511.1  | RP11-180N14.1  | 2.453074774 | 1.517403166 | 0.320649173 | 4.732284673 | 2.22007E-06 | 3.86478E-05 |
| ENSG00000004399.8  | PLXND1         | 293.7474607 | 0.717511085 | 0.151733255 | 4.728766183 | 2.25888E-06 | 3.92412E-05 |
| ENSG00000026036.16 | RTEL1-TNFRSF6B | 26.07717481 | 0.975411119 | 0.206334084 | 4.727338802 | 2.27482E-06 | 3.94354E-05 |
| ENSG00000228612.2  | HK2P1          | 63.38485613 | 1.03554474  | 0.219115901 | 4.726013654 | 2.2897E-06  | 3.96383E-05 |
| ENSG00000142227.6  | EMP3           | 76.44184591 | 0.716663618 | 0.151684492 | 4.724699338 | 2.30456E-06 | 3.98401E-05 |
| ENSG00000157827.15 | FMNL2          | 261.5634007 | 0.470084036 | 0.099590881 | 4.720151425 | 2.35669E-06 | 4.06848E-05 |
| ENSG00000176788.7  | BASP1          | 140.2321619 | 1.149396325 | 0.243627535 | 4.717842442 | 2.38359E-06 | 4.10922E-05 |
| ENSG00000178202.8  | KDEL2          | 306.5164395 | 0.437516139 | 0.092745855 | 4.717365936 | 2.38918E-06 | 0.00004116  |
| ENSG00000198832.6  | SELM           | 144.4917899 | 0.5894018   | 0.124974189 | 4.716188248 | 0.000002403 | 4.13702E-05 |
| ENSG00000197506.6  | SLC28A3        | 60.3384951  | 1.026867322 | 0.217778224 | 4.715197436 | 2.41476E-06 | 4.15146E-05 |
| ENSG00000159871.10 | LYPD5          | 21.26591993 | 1.536695518 | 0.326034424 | 4.713292233 | 2.43746E-06 | 4.18595E-05 |
| ENSG00000211943.2  | IGHV3-15       | 271.673488  | 1.696039294 | 0.35984636  | 4.713231769 | 2.43819E-06 | 4.18595E-05 |
| ENSG00000104728.11 | ARHGEF10       | 97.55966509 | 0.595706662 | 0.126455641 | 4.710795479 | 2.46752E-06 | 4.23338E-05 |
| ENSG00000250274.1  | CTB-114C7.4    | 1.589974388 | 2.626366184 | 0.557707206 | 4.70922046  | 2.48666E-06 | 4.26329E-05 |
| ENSG00000017260.15 | ATP2C1         | 877.8944013 | 0.323195573 | 0.068650319 | 4.707852482 | 2.5034E-06  | 4.28609E-05 |
| ENSG00000112578.5  | BYSL           | 36.14276079 | 0.429262723 | 0.091254215 | 4.704031759 | 2.55074E-06 | 4.36103E-05 |
| ENSG00000165188.9  | RNF183         | 4.927797729 | 1.497390734 | 0.318463325 | 4.701925211 | 2.5772E-06  | 4.40033E-05 |
| ENSG00000091317.7  | CMTM6          | 1423.849978 | 0.464668278 | 0.098830693 | 4.701659605 | 2.58055E-06 | 4.40304E-05 |
| ENSG00000197646.6  | PDCD1L1G2      | 40.45543809 | 1.09868237  | 0.233693417 | 4.70138348  | 0.000002584 | 4.40598E-05 |
| ENSG00000188215.5  | DCUN1D3        | 146.2786757 | 0.435430398 | 0.092759311 | 4.694196127 | 2.67657E-06 | 4.53887E-05 |
| ENSG00000157570.7  | TSPAN18        | 49.48810887 | 0.85950716  | 0.183150411 | 4.692903259 | 2.69355E-06 | 4.55834E-05 |
| ENSG00000181649.5  | PHLDA2         | 17.84926159 | 1.154706361 | 0.246084336 | 4.69231963  | 2.70125E-06 | 4.56826E-05 |
| ENSG00000160182.2  | TFF1           | 343.512185  | 1.260093648 | 0.268576434 | 4.691750608 | 2.70877E-06 | 4.57788E-05 |
| ENSG00000163923.5  | RPL39L         | 17.23416688 | 0.80623979  | 0.17190805  | 4.689947864 | 2.73275E-06 | 4.61214E-05 |
| ENSG00000127920.5  | GNG11          | 139.3619636 | 0.674800876 | 0.143917703 | 4.688796884 | 2.74816E-06 | 4.63501E-05 |
| ENSG00000163577.3  | E1F5A2         | 59.16718316 | 0.63287378  | 0.135015673 | 4.687409746 | 2.76685E-06 | 4.66021E-05 |
| ENSG00000135046.9  | ANXA1          | 557.8163011 | 0.808227943 | 0.172432317 | 4.68721849  | 2.76943E-06 | 4.66141E-05 |
| ENSG00000142669.9  | SH3BGL3        | 727.1444882 | 0.539980624 | 0.115213318 | 4.686789971 | 2.77524E-06 | 4.66802E-05 |
| ENSG00000160951.3  | PTGER1         | 3.405506993 | 1.722825608 | 0.367612445 | 4.686526889 | 2.7788E-06  | 4.67087E-05 |
| ENSG00000138722.5  | MMRN1          | 260.4865485 | 1.102236944 | 0.235514434 | 4.680124793 | 0.000002867 | 4.80614E-05 |
| ENSG00000149564.7  | ESAM           | 67.97817406 | 0.681136846 | 0.145577202 | 4.678870288 | 2.8846E-06  | 4.82913E-05 |
| ENSG00000167721.6  | TSR1           | 312.0744049 | 0.339399466 | 0.07254628  | 4.678385504 | 2.89143E-06 | 4.83731E-05 |
| ENSG00000122863.5  | CHST3          | 62.51148032 | 0.828647546 | 0.177216518 | 4.675904674 | 2.92661E-06 | 4.88304E-05 |
| ENSG00000177464.4  | GNP4           | 6.307295256 | 1.214973349 | 0.259853376 | 4.67561118  | 2.93079E-06 | 4.88675E-05 |
| ENSG00000185885.11 | IFITM1         | 571.3683253 | 0.960064504 | 0.205362495 | 4.674974882 | 2.9399E-06  | 4.89865E-05 |
| ENSG00000145113.17 | MUC4           | 1023.547793 | 1.376416388 | 0.294715696 | 4.670319247 | 3.00732E-06 | 4.99095E-05 |
| ENSG00000272636.1  | DOC2B          | 9.9786423   | 1.268331772 | 0.271736631 | 4.66750385  | 3.04881E-06 | 5.04971E-05 |
| ENSG00000127528.5  | KLF2           | 49.51439358 | 0.993815613 | 0.213113927 | 4.663306733 | 3.11168E-06 | 5.14358E-05 |
| ENSG00000109861.11 | CTSC           | 1925.109727 | 0.556933966 | 0.119436586 | 4.663009767 | 3.11618E-06 | 5.14418E-05 |
| ENSG00000170854.13 | MINA           | 264.299684  | 0.389715694 | 0.083574443 | 4.66309654  | 3.11487E-06 | 5.14418E-05 |
| ENSG00000168334.8  | XIRP1          | 1.989659992 | 3.571159932 | 0.765963774 | 4.662309177 | 3.12681E-06 | 0.000051583 |
| ENSG00000136040.4  | PLXNC1         | 447.024132  | 0.678185926 | 0.145484127 | 4.661580195 | 3.13791E-06 | 5.16976E-05 |
| ENSG00000196305.13 | IARS           | 1163.638245 | 0.405765621 | 0.087089175 | 4.659196964 | 3.17445E-06 | 5.22306E-05 |
| ENSG00000185386.10 | MAPK11         | 21.91295247 | 0.884010929 | 0.189801948 | 4.657544028 | 0.0000032   | 5.24572E-05 |
| ENSG00000123352.13 | SPATS2         | 167.5932294 | 0.431501604 | 0.092665334 | 4.656559089 | 3.21538E-06 | 5.26257E-05 |
| ENSG00000181260.8  | MTHFD2P7       | 4.224303723 | 1.187476685 | 0.255122991 | 4.654526356 | 3.24726E-06 | 5.31126E-05 |
| ENSG00000165733.7  | BMS1           | 435.6038545 | 0.229032602 | 0.049265414 | 4.648953169 | 3.33624E-06 | 5.43892E-05 |
| ENSG00000070190.8  | DAPP1          | 178.1791683 | 1.190018173 | 0.256032815 | 4.64791271  | 3.35311E-06 | 5.46284E-05 |
| ENSG00000127241.12 | MASP1          | 55.23847875 | 1.46188359  | 0.314582612 | 4.647057825 | 0.000003367 | 5.48194E-05 |
| ENSG00000211935.2  | IGHV1-3        | 20.67708266 | 1.807004888 | 0.389024505 | 4.644964166 | 3.40135E-06 | 5.53059E-05 |
| ENSG00000163513.13 | TGFBR2         | 1475.422414 | 0.434252705 | 0.093536189 | 4.642617044 | 3.44024E-06 | 5.58253E-05 |
| ENSG00000173918.10 | C1QTNF1        | 82.32124963 | 0.724613849 | 0.156082848 | 4.642495039 | 3.44227E-06 | 5.58253E-05 |
| ENSG00000197157.6  | SND1           | 1348.590919 | 0.317580991 | 0.068434035 | 4.6406878   | 3.47251E-06 | 0.000056265 |
| ENSG00000269728.1  | RP11-145M9.4   | 122.9078136 | 0.607395652 | 0.130887157 | 4.64060542  | 3.4739E-06  | 0.000056265 |
| ENSG00000128581.11 | RABL5          | 43.32707243 | 0.514732039 | 0.111110714 | 4.632604913 | 3.61093E-06 | 5.81475E-05 |
| ENSG00000251593.1  | MSNP1          | 24.49708262 | 0.851566173 | 0.183823816 | 4.632512761 | 3.61254E-06 | 5.81475E-05 |
| ENSG00000241351.1  | IGKV3-11       | 768.4399783 | 1.654941864 | 0.357662473 | 4.62710513  | 3.70812E-06 | 5.94781E-05 |
| ENSG00000020129.11 | NCDN           | 71.11169263 | 0.618280104 | 0.133631198 | 4.626764646 | 3.71422E-06 | 5.94875E-05 |
| ENSG00000100427.11 | MLC1           | 2.050960373 | 1.830396694 | 0.39570263  | 4.625687466 | 3.73358E-06 | 5.96558E-05 |
| ENSG00000133065.6  | SLC41A1        | 80.66625236 | 0.660589148 | 0.142826373 | 4.625120225 | 3.74381E-06 | 5.97483E-05 |
| ENSG00000169826.6  | CSGALNACT2     | 147.8734036 | 0.616303566 | 0.133306755 | 4.623198322 | 3.77868E-06 | 6.01833E-05 |
| ENSG00000239819.1  | IGKV1D-8       | 3.172634229 | 1.837617757 | 0.397474826 | 4.62323055  | 3.77809E-06 | 6.01833E-05 |
| ENSG00000132718.7  | SYT11          | 119.7919949 | 0.698110011 | 0.151132143 | 4.619202757 | 3.85217E-06 | 6.12754E-05 |
| ENSG00000239672.3  | NME1           | 127.6530832 | 0.668048049 | 0.144636815 | 4.618796747 | 3.85972E-06 | 0.000061317 |
| ENSG00000008513.10 | ST3GAL1        | 321.9707894 | 0.712297135 | 0.154251036 | 4.617778611 | 3.8787E-06  | 6.15793E-05 |
| ENSG00000187801.10 | ZFP69B         | 21.20450199 | 0.677707788 | 0.146796409 | 4.616650992 | 3.89982E-06 | 6.18657E-05 |
| ENSG00000211938.2  | IGHV3-7        | 425.8654004 | 1.583141287 | 0.342927308 | 4.616550656 | 3.90171E-06 | 6.18657E-05 |
| ENSG00000211946.2  | IGHV3-20       | 12.5643022  | 2.475745124 | 0.536337783 | 4.616018494 | 3.91172E-06 | 0.000061985 |
| ENSG00000071282.7  | LMCD1          | 46.33328468 | 0.681537074 | 0.147747458 | 4.612851446 | 3.97182E-06 | 6.28174E-05 |
| ENSG00000163993.6  | S100P          | 356.9882955 | 1.38426025  | 0.300181012 | 4.611418423 | 3.99931E-06 | 6.31718E-05 |
| ENSG00000101347.7  | SAMHD1         | 1196.904918 | 0.566899546 | 0.123081787 | 4.605876772 | 4.10732E-06 | 6.46149E-05 |
| ENSG00000170989.8  | S1PR1          | 117.6075227 | 0.772071448 | 0.167630264 | 4.605799862 | 4.10883E-06 | 6.46149E-05 |
| ENSG00000175040.4  | CHST2          | 84.22950266 | 0.930328115 | 0.202196693 | 4.601104501 | 4.20257E-06 | 6.59223E-05 |
| ENSG00000160255.12 | ITGB2          | 532.152607  | 0.941670537 | 0.204730601 | 4.599559293 | 4.23386E-06 | 6.63713E-05 |
| ENSG00000078053.12 | AMPH           | 11.3388524  | 1.098041605 | 0.238957771 | 4.595128252 | 4.32483E-06 | 6.74999E-05 |
| ENSG00000135077.4  | HAVCR2         |             |             |             |             |             |             |

## upreg\_DEGs

|                    |             |             |             |             |             |             |             |
|--------------------|-------------|-------------|-------------|-------------|-------------|-------------|-------------|
| ENSG00000132507.13 | EIF5A       | 783.4433455 | 0.444194185 | 0.097446119 | 4.558356873 | 5.15554E-06 | 7.84876E-05 |
| ENSG00000233901.1  | RP11-65J3.1 | 2.228685833 | 1.391167283 | 0.305197503 | 4.558252505 | 5.1581E-06  | 7.84876E-05 |
| ENSG00000134571.6  | MYBPC3      | 1.645563612 | 2.031008135 | 0.445909322 | 4.554755947 | 5.24464E-06 | 7.96098E-05 |
| ENSG00000186818.8  | LILRB4      | 81.81300722 | 1.263471379 | 0.277450692 | 4.553859169 | 5.26706E-06 | 7.98042E-05 |
| ENSG00000213694.3  | S1PR3       | 63.84751747 | 1.063186608 | 0.233501941 | 4.553223852 | 0.000005283 | 0.000079997 |
| ENSG00000086062.8  | B4GALT1     | 654.421682  | 0.589569645 | 0.129506456 | 4.552434387 | 5.30287E-06 | 0.000080249 |
| ENSG00000243766.3  | HOTTIP      | 93.52902918 | 1.546013561 | 0.339720447 | 4.550840471 | 5.3432E-06  | 8.07612E-05 |
| ENSG00000169330.4  | KIAA1024    | 15.04438709 | 0.861974647 | 0.189460985 | 4.549615564 | 5.3744E-06  | 8.11835E-05 |
| ENSG0000005238.15  | FAM214B     | 193.6979519 | 0.500764087 | 0.11012251  | 4.547336315 | 5.43291E-06 | 0.000081919 |
| ENSG00000173227.9  | SYT12       | 7.587057551 | 1.862220412 | 0.409530618 | 4.547206799 | 5.43626E-06 | 0.000081919 |
| ENSG00000173621.8  | LRFN4       | 76.58077964 | 0.724343773 | 0.159288465 | 4.547371165 | 0.000005432 | 0.000081919 |
| ENSG00000051108.10 | HERPUD1     | 1210.018679 | 0.450805756 | 0.09916823  | 4.545868724 | 5.47091E-06 | 8.23914E-05 |
| ENSG00000164736.5  | SOX17       | 8.442087047 | 1.000352516 | 0.22015013  | 4.543956056 | 5.52082E-06 | 8.29923E-05 |
| ENSG00000176014.8  | TUBB6       | 168.2097771 | 0.699053459 | 0.154040204 | 4.538123431 | 5.6757E-06  | 8.51663E-05 |
| ENSG00000140030.4  | GPR65       | 99.80699581 | 0.822372563 | 0.181267536 | 4.536789002 | 5.71172E-06 | 8.56036E-05 |
| ENSG00000182934.7  | SRPR        | 972.5973246 | 0.312459253 | 0.068885377 | 4.535930052 | 0.000005735 | 8.59011E-05 |
| ENSG00000150347.10 | ARIDS5B     | 689.2599335 | 0.42376416  | 0.09348673  | 4.532880359 | 5.81848E-06 | 8.69941E-05 |
| ENSG00000164867.6  | NOS3        | 49.31838599 | 0.788836711 | 0.174077708 | 4.531520559 | 5.85606E-06 | 0.000087451 |
| ENSG00000122691.8  | TWIST1      | 4.275094966 | 1.53112955  | 0.338127875 | 4.528255915 | 5.94725E-06 | 8.86002E-05 |
| ENSG00000141424.8  | SLC39A6     | 273.3947626 | 0.492291076 | 0.108741466 | 4.52716975  | 5.97789E-06 | 8.89502E-05 |
| ENSG00000130052.9  | STARD8      | 45.479449   | 0.731153192 | 0.161546478 | 4.525961829 | 6.01214E-06 | 8.92997E-05 |
| ENSG00000110446.5  | SLC15A3     | 117.2835818 | 0.794311086 | 0.175608991 | 4.523180054 | 6.09174E-06 | 9.03203E-05 |
| ENSG00000118985.10 | ELL2        | 512.9357052 | 0.598735433 | 0.132368391 | 4.523250812 | 6.0897E-06  | 9.03203E-05 |
| ENSG00000101017.9  | CD40        | 106.2506683 | 0.972444761 | 0.215000893 | 4.522980108 | 6.0975E-06  | 9.03216E-05 |
| ENSG00000135838.9  | NPL         | 96.14246171 | 0.611166292 | 0.135149012 | 4.522166175 | 0.000006121 | 9.05616E-05 |
| ENSG00000187583.6  | PLEKHN1     | 3.740161335 | 1.686274708 | 0.372987882 | 4.520990603 | 6.15509E-06 | 9.08807E-05 |
| ENSG00000103021.5  | CCDC113     | 27.49182333 | 0.603713664 | 0.133550786 | 4.520480038 | 0.00000617  | 9.10462E-05 |
| ENSG00000109790.12 | KLHL5       | 244.9297983 | 0.688400939 | 0.152304306 | 4.519904644 | 6.18675E-06 | 9.11859E-05 |
| ENSG00000105612.4  | DNASE2      | 187.0576679 | 0.446114104 | 0.09874788  | 4.517708174 | 6.25126E-06 | 9.19189E-05 |
| ENSG00000106683.10 | LIMK1       | 140.162764  | 0.653379781 | 0.144640358 | 4.517271609 | 6.26415E-06 | 9.20542E-05 |
| ENSG00000158092.2  | NCK1        | 309.7525741 | 0.369942122 | 0.081935949 | 4.515016016 | 6.3312E-06  | 9.29297E-05 |
| ENSG00000225422.3  | RBMS1P1     | 33.44466181 | 0.655671801 | 0.145257332 | 4.513863723 | 6.36571E-06 | 9.33263E-05 |
| ENSG00000167656.4  | LY6D        | 3.306844871 | 5.000561654 | 1.107993596 | 4.513168373 | 6.38663E-06 | 9.35228E-05 |
| ENSG00000180644.6  | PRF1        | 107.1096528 | 1.167460239 | 0.258987166 | 4.507791855 | 6.55058E-06 | 9.57546E-05 |
| ENSG00000157021.9  | FAM92A1P1   | 9.601627961 | 0.804168353 | 0.17848266  | 4.505582529 | 6.61911E-06 | 9.64732E-05 |
| ENSG00000133962.3  | CATSPERB    | 51.87704118 | 1.003825351 | 0.222805601 | 4.505386512 | 6.62522E-06 | 9.65057E-05 |
| ENSG00000100342.16 | APOL1       | 504.584422  | 1.205182651 | 0.267702902 | 4.501940934 | 6.73357E-06 | 9.79693E-05 |
| ENSG00000127589.4  | TUBBP1      | 98.23022649 | 0.475284306 | 0.105577657 | 4.501750829 | 6.7396E-06  | 9.79997E-05 |
| ENSG00000072042.8  | RDH11       | 438.7252671 | 0.544323886 | 0.120923083 | 4.501405957 | 6.75054E-06 | 9.81016E-05 |
| ENSG00000143641.8  | GALNT2      | 474.4899702 | 0.473069835 | 0.105096978 | 4.501269628 | 6.75488E-06 | 9.81073E-05 |
| ENSG00000156795.2  | WDYHV1      | 43.13597866 | 0.339489098 | 0.075427164 | 4.500886394 | 6.76707E-06 | 0.000098227 |
| ENSG00000255737.2  | AGAP2-AS1   | 14.88623084 | 0.71521052  | 0.158981604 | 4.498699852 | 0.000006837 | 9.90117E-05 |
| ENSG00000169129.10 | AFAP1L2     | 140.3326184 | 0.494650718 | 0.109967711 | 4.49814507  | 6.85489E-06 | 9.92126E-05 |
| ENSG00000223414.2  | LINC00473   | 7.118651499 | 2.018505299 | 0.44876799  | 4.497881628 | 6.86339E-06 | 9.92779E-05 |
| ENSG00000043462.7  | LCP2        | 339.5301006 | 0.826587386 | 0.183801222 | 4.497181117 | 0.000006886 | 9.95447E-05 |
| ENSG00000111341.5  | MGP         | 113.5311061 | 1.009437983 | 0.224522718 | 4.495928041 | 6.92672E-06 | 0.00010002  |
| ENSG00000142686.7  | C1orf216    | 45.52948926 | 0.657452833 | 0.14625811  | 4.495154714 | 6.95194E-06 | 0.000100267 |
| ENSG00000167191.7  | GPRC5B      | 78.92038916 | 0.638497597 | 0.142060751 | 4.494539076 | 6.97208E-06 | 0.000100442 |
| ENSG00000165490.8  | C11orf82    | 43.6176234  | 0.736536407 | 0.163888945 | 4.494118906 | 6.98586E-06 | 0.000100582 |
| ENSG00000136634.5  | IL10        | 9.56244114  | 1.187217357 | 0.26451534  | 4.488274136 | 7.18025E-06 | 0.000103142 |
| ENSG00000128656.9  | CHN1        | 47.3219159  | 0.948642165 | 0.211382153 | 4.487806326 | 0.000007196 | 0.000103309 |
| ENSG00000235750.5  | KIAA0040    | 384.2592807 | 0.463739917 | 0.103367262 | 4.486332578 | 0.000007246 | 0.000103966 |
| ENSG00000183018.4  | SPNS2       | 236.4845478 | 0.84828891  | 0.189122309 | 4.485398431 | 7.27778E-06 | 0.000104362 |
| ENSG00000180535.3  | BHLHA15     | 16.61863663 | 1.083610225 | 0.241670818 | 4.483827347 | 7.3316E-06  | 0.000105074 |
| ENSG00000222041.6  | LINC00152   | 31.84991969 | 0.988948213 | 0.220588707 | 4.483222301 | 7.35243E-06 | 0.000105312 |
| ENSG00000159212.8  | CLIC6       | 34.64491618 | 1.008018726 | 0.224877541 | 4.4825229   | 7.37657E-06 | 0.000105597 |
| ENSG00000171488.10 | LRRRC8C     | 215.5267227 | 0.603634363 | 0.134692104 | 4.481586845 | 0.000007409 | 0.000106    |
| ENSG00000100290.2  | BIK         | 56.11663601 | 0.734789915 | 0.164009258 | 4.480173408 | 7.45824E-06 | 0.000106582 |
| ENSG00000179271.1  | GADD45GIP1  | 89.59444459 | 0.389215146 | 0.086897947 | 4.47899126  | 7.49966E-06 | 0.000106928 |
| ENSG00000227295.2  | ELL2P1      | 36.14178066 | 0.617230418 | 0.137802146 | 4.479105986 | 7.49563E-06 | 0.000106928 |
| ENSG00000183696.9  | UPP1        | 131.1982414 | 0.63011248  | 0.1407381   | 4.477199004 | 7.56287E-06 | 0.000107583 |
| ENSG00000114346.9  | ECT2        | 437.4622514 | 0.634684744 | 0.141801911 | 4.475854672 | 7.61062E-06 | 0.000108    |
| ENSG00000165929.8  | TC2N        | 1281.915558 | 0.493766473 | 0.110395993 | 4.472684743 | 7.72436E-06 | 0.000109755 |
| ENSG00000116670.10 | MAD2L2      | 51.63622022 | 0.581578773 | 0.13008946  | 4.470606421 | 7.79981E-06 | 0.000110574 |
| ENSG00000115271.6  | GCA         | 240.0023567 | 0.64125422  | 0.143463055 | 4.469821307 | 7.8285E-06  | 0.000110855 |
| ENSG00000170425.3  | ADORA2B     | 91.15998891 | 0.894357348 | 0.200112138 | 4.469280857 | 7.8483E-06  | 0.000111009 |
| ENSG00000216490.3  | IFI30       | 19.49016488 | 0.994273828 | 0.222557007 | 4.4675018   | 7.91383E-06 | 0.000111701 |
| ENSG00000262001.1  | DLGAP1-AS2  | 25.30471523 | 0.652500137 | 0.146068364 | 4.467087312 | 7.92918E-06 | 0.000111835 |
| ENSG00000143702.11 | CEP170      | 267.4228502 | 0.579463166 | 0.129723558 | 4.466907748 | 7.93583E-06 | 0.000111866 |
| ENSG00000166197.12 | NOLC1       | 507.4658841 | 0.362514367 | 0.081159472 | 4.466692021 | 7.94384E-06 | 0.000111915 |
| ENSG00000183019.3  | C19orf59    | 2.17046786  | 4.809945818 | 1.07818417  | 4.461154179 | 8.15194E-06 | 0.000114523 |
| ENSG00000168032.4  | ENTPD3      | 14.5699447  | 1.553194937 | 0.348227495 | 4.460288063 | 0.000008185 | 0.000114857 |
| ENSG00000219891.2  | ZSCAN12P1   | 10.92042914 | 0.803990822 | 0.180455365 | 4.455344518 | 8.37586E-06 | 0.000117206 |
| ENSG00000263426.1  | RN7SL471P   | 7.428157795 | 1.499352633 | 0.336725251 | 4.452747843 | 8.47783E-06 | 0.000118433 |
| ENSG00000175352.6  | NRIP3       | 10.49961673 | 0.960909496 | 0.215826396 | 4.452233423 | 8.49817E-06 | 0.00011865  |
| ENSG00000169032.5  | MAP2K1      | 265.5115578 | 0.370382331 | 0.083207904 | 4.45128782  | 8.53568E-06 | 0.000119107 |
| ENSG00000150630.2  | VEGFC       | 17.84135924 | 0.792413571 | 0.178029896 | 4.451014056 | 8.54657E-06 | 0.000119126 |
| ENSG00000137198.5  | GMFR        | 15.63876268 | 1.003167577 | 0.225415881 | 4.450296808 | 8.57517E-06 | 0.000119403 |
| ENSG00000117122.9  | MFAP2       | 14.32145332 | 1.043702649 | 0.234739281 | 4.446220698 | 8.73942E-06 | 0.00012127  |
| ENSG00000129128.8  | SPCS3       | 1910.575033 | 0.385026368 | 0.086595108 | 4.446283124 | 8.73688E-06 | 0.00012127  |
| ENSG00000111450.9  | STX2        | 83.13600508 | 0.514911234 | 0.115873022 | 4.443754257 | 8.84026E-06 | 0.000122465 |
| ENSG00000173846.8  | PLK3        | 61.96245451 | 0.970596247 | 0.218545394 | 4.441165413 | 8.9473E-06  | 0.000123879 |
| ENSG00000153002.7  | CPB1        | 4.827493829 | 2.418309431 | 0.544593286 | 4.440578855 | 8.97172E-06 | 0.000124079 |
| ENSG00000225873.1  | LINC00694   | 1.955041153 | 1.879560375 | 0.423365666 | 4.439567326 | 0.000009014 | 0.000124525 |
| ENSG00000144908.9  | ALDH1L1     | 109.7483099 | 1.502123515 | 0.338446131 | 4.438294238 | 9.06746E-06 | 0.000125056 |
| ENSG00000128829.7  | EIF2AK4     | 394.6547618 | 0.290818521 | 0.065537684 | 4.437424424 | 9.10417E-06 | 0.000125447 |
| ENSG00000172638.8  | EFEMP2      | 76.61842971 | 0.585197818 | 0.131906442 | 4.436461243 | 0.000009145 | 0.000125846 |
| ENSG00000111716.8  | LDHB        | 829.4424683 | 0.742415917 | 0.167357884 | 4.436097661 | 9.16043E-06 | 0.000125919 |
| ENSG00000186591.7  | UBE2H       | 597.487994  | 0.241013024 | 0.054354505 | 4.434094722 | 0.000009246 | 0.000126747 |
| ENSG00000113356.6  | POLR3G      | 18.42965726 | 0.746817368 | 0.168442067 | 4.433674926 | 0.000009264 | 0.000126923 |
| ENSG00000177575.8  | CD163       | 308.3642706 | 0.793897447 | 0.179112116 | 4.432405049 | 9.31877E-06 | 0.000127491 |
| ENSG00000126660.9  | ELOVL5      | 388.0446463 | 0.689886831 | 0.155756887 | 4.429254113 | 0.000009456 | 0.000129268 |
| ENSG00000128567.12 | PDXL        | 395.0778527 | 0.480269373 | 0.108442122 | 4.428808312 | 9.47552E-06 | 0.000129464 |
| ENSG00000144815.10 | NXPE3       | 164.6363057 | 0.821168375 | 0.185529047 | 4.426090625 | 9.59562E-06 | 0.000130746 |
| ENSG00000175283.7  | DOLK        | 84.36898425 | 0.355465262 | 0.080348472 | 4.424045086 | 0.000009687 | 0.000131847 |
| ENSG00000061337.11 | LZTS1       | 13.6        |             |             |             |             |             |

## upreg\_DEGs

|                    |              |             |             |             |             |             |             |
|--------------------|--------------|-------------|-------------|-------------|-------------|-------------|-------------|
| ENSG0000078618.15  | NRD1         | 629.3110964 | 0.313626567 | 0.071291225 | 4.399231031 | 1.08635E-05 | 0.000145474 |
| ENSG00000186377.6  | CYP4X1       | 13.35796968 | 1.144267183 | 0.260259498 | 4.396639476 | 0.000010994 | 0.000147063 |
| ENSG00000164647.4  | STEAP1       | 90.01547844 | 0.779446167 | 0.177300439 | 4.396188597 | 1.10168E-05 | 0.000147289 |
| ENSG00000131459.8  | GFPT2        | 19.08033568 | 1.110083635 | 0.252586374 | 4.394867457 | 0.000011084 | 0.000148108 |
| ENSG00000175471.15 | MCTP1        | 160.1713343 | 0.602160035 | 0.137049351 | 4.393745994 | 1.11414E-05 | 0.000148715 |
| ENSG00000175745.7  | NR2F1        | 41.01664186 | 0.781797787 | 0.177996854 | 4.392200038 | 1.12209E-05 | 0.000149617 |
| ENSG00000239948.2  | RN7SL368P    | 1.523356139 | 2.265421367 | 0.51583809  | 4.39172952  | 1.12453E-05 | 0.000149851 |
| ENSG00000211637.2  | IGLV4-69     | 41.18087042 | 1.472194625 | 0.33527487  | 4.39100797  | 1.12826E-05 | 0.000150118 |
| ENSG00000106541.7  | AGR2         | 9429.093137 | 0.932434782 | 0.212404611 | 4.389898959 | 1.13403E-05 | 0.000150724 |
| ENSG00000184160.6  | ADRA2C       | 3.964160597 | 1.753876638 | 0.39952337  | 4.389922514 | 1.13391E-05 | 0.000150724 |
| ENSG00000120156.16 | TEK          | 136.8590776 | 0.607891748 | 0.13850248  | 4.389031512 | 1.13857E-05 | 0.000151246 |
| ENSG00000106803.5  | SEC61B       | 315.21472   | 0.40333091  | 0.091937445 | 4.38701457  | 1.14917E-05 | 0.000152248 |
| ENSG0000019186.5   | CYP24A1      | 5.426566095 | 3.646140401 | 0.831187035 | 4.386666599 | 1.15101E-05 | 0.00015233  |
| ENSG00000143537.9  | ADAM15       | 550.4046725 | 0.46699603  | 0.106516193 | 4.384272645 | 1.16374E-05 | 0.000153769 |
| ENSG00000111199.6  | TRPV4        | 5.027673767 | 1.137608835 | 0.259567675 | 4.382706115 | 1.17214E-05 | 0.000154797 |
| ENSG00000112769.14 | LAMA4        | 949.4921666 | 0.582624185 | 0.132941083 | 4.382574382 | 1.17285E-05 | 0.000154809 |
| ENSG00000167695.10 | FAM57A       | 102.3092927 | 0.627000094 | 0.143146952 | 4.380114887 | 1.18617E-05 | 0.000156401 |
| ENSG00000232742.2  | RHOQP2       | 6.852087016 | 0.995790143 | 0.227473514 | 4.377609181 | 1.19988E-05 | 0.000158125 |
| ENSG00000259863.1  | SH3RF3-AS1   | 1.443807359 | 1.650171851 | 0.377017029 | 4.376915956 | 0.000012037 | 0.000158545 |
| ENSG00000137573.9  | SULF1        | 430.5618684 | 0.875197792 | 0.20011107  | 4.373560097 | 1.22237E-05 | 0.000160694 |
| ENSG00000117114.15 | LPHN2        | 347.3863906 | 0.658312488 | 0.150602142 | 4.37120269  | 1.23564E-05 | 0.000162236 |
| ENSG00000049323.11 | LTBP1        | 444.346509  | 0.50197158  | 0.114843597 | 4.37091482  | 1.23727E-05 | 0.000162365 |
| ENSG00000116157.5  | GPX7         | 31.88137465 | 0.841579704 | 0.192580303 | 4.370019629 | 1.24235E-05 | 0.000162946 |
| ENSG00000101255.6  | TRIB3        | 37.63287128 | 0.751355249 | 0.171941585 | 4.369828554 | 1.24344E-05 | 0.000163003 |
| ENSG00000104290.6  | FZD3         | 165.5726085 | 0.441159613 | 0.100959857 | 4.369653692 | 1.24444E-05 | 0.000163048 |
| ENSG00000118503.13 | TNFAIP3      | 547.0955316 | 0.75806843  | 0.173533919 | 4.368416457 | 1.25151E-05 | 0.000163715 |
| ENSG00000159840.11 | ZYX          | 317.85111   | 0.704020368 | 0.161171192 | 4.368152648 | 1.25302E-05 | 0.000163741 |
| ENSG00000154511.7  | FAM69A       | 145.7823299 | 0.407010747 | 0.093182733 | 4.367877321 | 0.000012546 | 0.000163862 |
| ENSG00000100196.6  | KDEL3        | 265.919999  | 0.795181039 | 0.182252419 | 4.363075359 | 1.28247E-05 | 0.000166997 |
| ENSG00000119812.14 | FAM98A       | 225.8230309 | 0.413819423 | 0.094846408 | 4.363047918 | 1.28263E-05 | 0.000166997 |
| ENSG00000141526.10 | SLC16A3      | 436.7365418 | 0.674428477 | 0.154596097 | 4.362519423 | 1.28573E-05 | 0.000167313 |
| ENSG00000175445.10 | LPL          | 106.5001126 | 1.234239203 | 0.282957457 | 4.361924988 | 1.28923E-05 | 0.000167681 |
| ENSG00000148175.8  | STOM         | 1277.228718 | 0.726919465 | 0.166768396 | 4.358856252 | 1.30744E-05 | 0.000169872 |
| ENSG00000173210.15 | ABLIM3       | 63.87808412 | 0.512220805 | 0.117539744 | 4.357851956 | 1.31345E-05 | 0.000170564 |
| ENSG00000164690.3  | SHH          | 54.09946427 | 0.880510301 | 0.20207009  | 4.357449936 | 1.31587E-05 | 0.000170788 |
| ENSG00000137959.11 | IFI44L       | 174.7445436 | 1.473120599 | 0.338090992 | 4.357171991 | 1.31754E-05 | 0.000170916 |
| ENSG00000163584.13 | RPL22L1      | 127.9938847 | 0.568337252 | 0.130488213 | 4.355468113 | 1.32783E-05 | 0.000171982 |
| ENSG00000163162.4  | RNF149       | 652.5943074 | 0.415386603 | 0.095420242 | 4.353233611 | 1.34144E-05 | 0.000173565 |
| ENSG00000118257.12 | NRP2         | 178.3218769 | 0.687472778 | 0.157981682 | 4.351598033 | 1.35149E-05 | 0.000174616 |
| ENSG00000073146.11 | MOV10L1      | 2.393361669 | 1.622394077 | 0.373023261 | 4.349310749 | 1.36566E-05 | 0.000176058 |
| ENSG00000109205.12 | ODAM         | 1.435653924 | 3.172615412 | 0.729594726 | 4.348462648 | 1.37095E-05 | 0.000176646 |
| ENSG00000126457.16 | PRMT1        | 390.2464306 | 0.378092301 | 0.086979445 | 4.34691553  | 1.38065E-05 | 0.000177715 |
| ENSG00000012232.4  | EXTL3        | 233.9771111 | 0.294887508 | 0.067850706 | 4.346122906 | 1.38565E-05 | 0.000178081 |
| ENSG00000104320.9  | NBN          | 810.7127495 | 0.425477778 | 0.097975227 | 4.342707764 | 1.40737E-05 | 0.000180698 |
| ENSG00000224650.2  | IGHV3-74     | 149.3062873 | 1.499301801 | 0.345246946 | 4.342693884 | 1.40746E-05 | 0.000180698 |
| ENSG000000257017.4 | HP           | 1.751693141 | 2.386927556 | 0.549729769 | 4.342001636 | 0.000014119 | 0.000181082 |
| ENSG000000330011.7 | ALG1         | 158.5309402 | 0.320902537 | 0.073916986 | 4.341391001 | 1.41584E-05 | 0.000181492 |
| ENSG00000155629.10 | PIK3AP1      | 533.9602191 | 0.790369074 | 0.182140213 | 4.339344178 | 1.42909E-05 | 0.00018272  |
| ENSG00000115355.11 | CDC88A       | 433.5809086 | 0.583864432 | 0.134579075 | 4.338448836 | 1.43492E-05 | 0.000183184 |
| ENSG00000213523.5  | SRA1         | 170.4213439 | 0.334598582 | 0.077122401 | 4.338539519 | 1.43433E-05 | 0.000183184 |
| ENSG00000162654.8  | GBP4         | 864.499216  | 1.26146514  | 0.290837551 | 4.337353051 | 1.44209E-05 | 0.000183911 |
| ENSG00000112531.12 | QKI          | 624.2200009 | 0.513899432 | 0.118526454 | 4.33573614  | 1.45273E-05 | 0.000184998 |
| ENSG00000105219.4  | CNTD2        | 0.971037373 | 2.156798492 | 0.497550307 | 4.334835012 | 1.45869E-05 | 0.000185616 |
| ENSG00000127946.12 | HIP1         | 190.3960685 | 0.496357844 | 0.114558554 | 4.332787267 | 1.47233E-05 | 0.000187001 |
| ENSG00000101310.10 | SEC23B       | 680.3623834 | 0.384550787 | 0.088767294 | 4.332122424 | 1.47679E-05 | 0.000187472 |
| ENSG00000259626.2  | RP11-925D8.2 | 0.468009135 | 4.707293131 | 1.086901117 | 4.33093044  | 1.48481E-05 | 0.000188297 |
| ENSG000000253193.4 | FCGR1C       | 1.744733431 | 2.674363361 | 0.617570397 | 4.330459127 | 1.48799E-05 | 0.000188605 |
| ENSG00000181192.7  | DHTKD1       | 399.6404626 | 0.2503336   | 0.057817311 | 4.329734393 | 1.49289E-05 | 0.00018913  |
| ENSG00000165732.8  | DDX21        | 1047.38089  | 0.476364005 | 0.110042377 | 4.328914186 | 1.49846E-05 | 0.000189739 |
| ENSG00000151135.5  | C12orf23     | 523.3673165 | 0.471860329 | 0.109057775 | 4.326700507 | 0.000015136 | 0.000191266 |
| ENSG00000183621.2  | ZNF438       | 89.29128281 | 0.367968682 | 0.085045624 | 4.326720932 | 1.51346E-05 | 0.000191266 |
| ENSG00000077150.13 | NFKB2        | 241.80702   | 0.667151938 | 0.154212749 | 4.326178879 | 1.51718E-05 | 0.00019152  |
| ENSG00000079819.12 | EPB41L2      | 848.2620551 | 0.449396659 | 0.103880966 | 4.326073162 | 1.51791E-05 | 0.00019152  |
| ENSG00000272666.1  | CTA-384D8.35 | 2.535305227 | 1.826433668 | 0.422316149 | 4.324801864 | 1.52669E-05 | 0.00019253  |
| ENSG00000186827.6  | TNFRSF4      | 18.74637792 | 1.140697781 | 0.264043117 | 4.320119359 | 1.55945E-05 | 0.000196462 |
| ENSG00000145088.4  | EAF2         | 81.09837109 | 0.732668414 | 0.169790324 | 4.315136427 | 1.59504E-05 | 0.000200439 |
| ENSG00000002549.8  | LAP3         | 1012.516612 | 0.936482104 | 0.217374758 | 4.308145592 | 1.64629E-05 | 0.000206284 |
| ENSG00000161940.6  | BCL6B        | 46.13112915 | 0.627097777 | 0.145562033 | 4.308113639 | 1.64653E-05 | 0.000206284 |
| ENSG00000110108.5  | TMEM109      | 228.8658023 | 0.415642102 | 0.096494109 | 4.307435013 | 1.65159E-05 | 0.00020671  |
| ENSG00000104689.5  | TNFRSF10A    | 165.5680729 | 0.455847823 | 0.105864568 | 4.305952721 | 1.66269E-05 | 0.00020789  |
| ENSG00000090861.11 | AARS         | 497.4012448 | 0.463106571 | 0.107579693 | 4.304776831 | 1.67154E-05 | 0.000208788 |
| ENSG00000135698.5  | MPHOSPH6     | 88.99652127 | 0.44966781  | 0.10456907  | 4.300198982 | 1.70645E-05 | 0.000212508 |
| ENSG00000169418.9  | NPR1         | 30.40555657 | 0.650434955 | 0.151268593 | 4.29986783  | 0.00001709  | 0.000212719 |
| ENSG00000230257.1  | NFE4         | 0.876392251 | 3.273702737 | 0.761395961 | 4.299606123 | 1.71102E-05 | 0.000212864 |
| ENSG00000146006.7  | LRRTM2       | 14.94167422 | 0.890475246 | 0.207170835 | 4.298265478 | 0.000017214 | 0.000213942 |
| ENSG00000235001.2  | E1FAA1P2     | 73.67142419 | 0.484479933 | 0.112714111 | 4.298307714 | 1.72107E-05 | 0.000213942 |
| ENSG00000196511.9  | TPK1         | 185.1063461 | 0.581394048 | 0.135310324 | 4.296745664 | 1.73324E-05 | 0.000215306 |
| ENSG00000164733.16 | CTSB         | 3424.563894 | 0.619827319 | 0.144413057 | 4.292044856 | 1.77035E-05 | 0.000219573 |
| ENSG00000100504.12 | PYGL         | 224.4705191 | 0.903173317 | 0.210481101 | 4.290994832 | 1.77874E-05 | 0.000220409 |
| ENSG00000180773.10 | SLC36A4      | 95.29375584 | 0.48170709  | 0.112277161 | 4.290339079 | 1.78401E-05 | 0.00022095  |
| ENSG00000150048.6  | CLEC1A       | 14.94986596 | 0.737481723 | 0.171917433 | 4.289743681 | 1.78879E-05 | 0.000221433 |
| ENSG00000162849.11 | KIF26B       | 27.53721264 | 1.039388953 | 0.242313152 | 4.289445054 | 0.000017912 | 0.000221621 |
| ENSG00000087253.7  | LPCAT2       | 340.0028802 | 0.475426942 | 0.110915633 | 4.286383525 | 1.81605E-05 | 0.000224139 |
| ENSG00000143669.9  | LYST         | 908.483053  | 0.402954573 | 0.094080978 | 4.283061058 | 0.000018434 | 0.000227243 |
| ENSG00000079150.13 | FKBP7        | 41.30675721 | 0.554705635 | 0.129532415 | 4.282369291 | 1.84914E-05 | 0.000227771 |
| ENSG00000196668.3  | LINC00173    | 2.121644059 | 1.582045119 | 0.369818984 | 4.277890506 | 1.88673E-05 | 0.000232171 |
| ENSG00000100036.11 | SLC35E4      | 35.88034268 | 0.591909595 | 0.138415702 | 4.276318259 | 0.000019001 | 0.000233575 |
| ENSG00000180801.11 | ARSL         | 68.03352762 | 0.838814626 | 0.196193005 | 4.275456336 | 1.90746E-05 | 0.000234028 |
| ENSG00000185155.7  | MIXL1        | 6.720201958 | 1.233429556 | 0.288486591 | 4.275517803 | 1.90694E-05 | 0.000234028 |
| ENSG00000077984.4  | CST7         | 45.87549192 | 0.971290682 | 0.22724267  | 4.274244282 | 1.91787E-05 | 0.000235189 |
| ENSG00000198363.11 | ASPH         | 1678.917086 | 0.452864547 | 0.105982012 | 4.273032164 | 1.92833E-05 | 0.000236123 |
| ENSG00000224593.1  | RP11-30B1.1  | 3.044201727 | 1.260240698 | 0.295023191 | 4.271666552 | 1.94018E-05 | 0.000237285 |
| ENSG00000134352.15 | IL6ST        | 3277.967463 | 0.42298013  | 0.099086393 | 4.268801355 | 1.96526E-05 | 0.000239937 |
| ENSG00000039139.9  | DNAH5        | 9.191673956 | 1.338679411 | 0.313610965 | 4.26859887  | 1.96705E-05 | 0.000240038 |
| ENSG00000118849.5  | RARRS1       | 646.06085   | 0.943272052 | 0.221016654 | 4.267877716 | 1.97341E-05 | 0.000240461 |
| ENSG00000026025.9  | VIM          | 3019.260826 | 0.610231353 | 0.143079446 | 4.264982655 | 1.99918E-05 | 0.000       |

## upreg\_DEGs

|                    |               |             |             |             |             |             |             |
|--------------------|---------------|-------------|-------------|-------------|-------------|-------------|-------------|
| ENSG00000168394.9  | TAP1          | 1527.210407 | 0.912918036 | 0.215025833 | 4.245620272 | 0.000021799 | 0.000261903 |
| ENSG00000164574.11 | GALNT10       | 683.5284322 | 0.291174519 | 0.068701393 | 4.23826221  | 2.25257E-05 | 0.000269983 |
| ENSG00000269640.1  | CTD-2521M24.9 | 44.69861288 | 0.753304257 | 0.177811925 | 4.236522693 | 2.27008E-05 | 0.000271709 |
| ENSG00000138135.5  | CH25H         | 31.35279755 | 1.055866219 | 0.249361152 | 4.234285136 | 0.000022928 | 0.000274277 |
| ENSG00000182963.5  | GJC1          | 53.67880028 | 0.818357671 | 0.193317397 | 4.233233447 | 2.30355E-05 | 0.000275298 |
| ENSG00000077943.7  | ITGA8         | 269.8721523 | 0.508067065 | 0.120035344 | 4.232645561 | 2.30958E-05 | 0.000275887 |
| ENSG00000161955.12 | TNFSF13       | 84.49942258 | 0.697088348 | 0.164745327 | 4.231308784 | 2.32335E-05 | 0.000277266 |
| ENSG00000137168.7  | PPIL1         | 148.2861938 | 0.592505624 | 0.140063159 | 4.230274618 | 2.33406E-05 | 0.000278148 |
| ENSG00000159388.5  | BTG2          | 1065.972422 | 0.724986308 | 0.171384936 | 4.230163553 | 2.33521E-05 | 0.000278148 |
| ENSG00000172023.3  | REG1B         | 3068.913218 | 2.938464813 | 0.694749191 | 4.22953326  | 2.34177E-05 | 0.000278795 |
| ENSG00000088727.8  | KIF9          | 34.39789676 | 0.449108586 | 0.10621765  | 4.228191705 | 2.35577E-05 | 0.000280194 |
| ENSG00000262074.3  | SNORD3B-2     | 37.57618911 | 0.946530552 | 0.223884882 | 4.227755553 | 2.36034E-05 | 0.000280335 |
| ENSG00000174600.9  | CMKLR1        | 203.5779585 | 0.64504083  | 0.152583733 | 4.227454786 | 0.000023635 | 0.000280576 |
| ENSG00000130429.8  | ARPC1B        | 786.4284067 | 0.420106304 | 0.09938905  | 4.226887202 | 2.36946E-05 | 0.000281151 |
| ENSG00000196843.11 | ARID5A        | 118.4804088 | 0.788808126 | 0.186653549 | 4.226054794 | 2.37824E-05 | 0.000281789 |
| ENSG00000165424.6  | ZCCHC24       | 148.5540996 | 0.519005813 | 0.122818894 | 4.225781534 | 2.38113E-05 | 0.000281997 |
| ENSG00000174307.5  | PHLDA3        | 37.00046502 | 0.845740538 | 0.200145002 | 4.225639061 | 2.38264E-05 | 0.000282042 |
| ENSG00000197905.4  | TEAD4         | 30.19210534 | 0.670347469 | 0.158664096 | 4.224947465 | 2.38997E-05 | 0.000282775 |
| ENSG00000203760.4  | CENPW         | 39.24002774 | 0.702504985 | 0.166360188 | 4.222795094 | 2.41291E-05 | 0.000284948 |
| ENSG00000240834.1  | IGKV1D-12     | 18.19599428 | 1.825953272 | 0.432396737 | 4.222865518 | 2.41216E-05 | 0.000284948 |
| ENSG00000151651.11 | ADAM8         | 138.1858538 | 0.943084743 | 0.223390209 | 4.221692374 | 2.42475E-05 | 0.000286074 |
| ENSG00000111537.4  | IFNG          | 14.52808041 | 2.724981232 | 0.645651934 | 4.220511224 | 2.43749E-05 | 0.000287058 |
| ENSG00000131725.9  | WDR44         | 282.3435851 | 0.330638253 | 0.078341782 | 4.220458688 | 2.43806E-05 | 0.000287058 |
| ENSG00000231632.1  | RP11-82L18.4  | 0.623135815 | 3.089411732 | 0.731984446 | 4.220597515 | 2.43656E-05 | 0.000287058 |
| ENSG00000090924.10 | PLEKHG2       | 130.3841216 | 0.782716956 | 0.185658827 | 4.215888728 | 2.48796E-05 | 0.000292148 |
| ENSG00000131462.3  | TUBG1         | 74.88736164 | 0.470805859 | 0.111683079 | 4.215552275 | 2.49168E-05 | 0.00029218  |
| ENSG00000154640.10 | BTG3          | 88.39983464 | 0.411200307 | 0.097539082 | 4.21574921  | 0.000024895 | 0.00029218  |
| ENSG00000185880.8  | TRIM69        | 371.0361156 | 0.714267996 | 0.169728643 | 4.208293791 | 2.57306E-05 | 0.000300863 |
| ENSG00000111729.8  | CLEC4A        | 32.94598637 | 0.735737135 | 0.174849552 | 4.207829693 | 2.57835E-05 | 0.000301199 |
| ENSG00000185904.7  | LINC00839     | 3.566925587 | 1.685558487 | 0.400736559 | 4.206151019 | 2.59757E-05 | 0.000303159 |
| ENSG00000128335.9  | APOL2         | 393.8747578 | 0.851468822 | 0.202537038 | 4.204015369 | 2.62221E-05 | 0.00030532  |
| ENSG00000183671.8  | GPR1          | 2.059478777 | 1.555039144 | 0.370038774 | 4.202368113 | 2.64137E-05 | 0.000307407 |
| ENSG00000168005.4  | C11orf84      | 47.9445174  | 0.487491001 | 0.116022879 | 4.201679939 | 2.64942E-05 | 0.000308199 |
| ENSG00000104356.6  | POP1          | 78.56132903 | 0.377154998 | 0.089770842 | 4.201308447 | 2.65377E-05 | 0.000308417 |
| ENSG00000124201.10 | ZNF11         | 1206.194811 | 0.437512684 | 0.104186195 | 4.199334502 | 2.67701E-05 | 0.000310683 |
| ENSG00000165168.6  | CYBB          | 1142.373377 | 0.760214338 | 0.181073436 | 4.198375834 | 2.68836E-05 | 0.000311855 |
| ENSG00000226025.5  | LGALS17A      | 2.229498964 | 2.717964207 | 0.647453254 | 4.197931184 | 2.69364E-05 | 0.000312322 |
| ENSG00000232882.1  | PHKA1P1       | 9.283414586 | 0.696734842 | 0.166001328 | 4.197164274 | 2.70278E-05 | 0.000313161 |
| ENSG00000240184.2  | PCDHGC3       | 79.68152171 | 0.613999455 | 0.146290906 | 4.197112945 | 2.70339E-05 | 0.000313161 |
| ENSG00000172322.9  | CLEC12A       | 25.95020233 | 0.935048186 | 0.222875046 | 4.195392005 | 0.00002724  | 0.000315255 |
| ENSG00000179294.5  | C17orf96      | 11.50073248 | 1.208883176 | 0.288283208 | 4.19338742  | 2.74819E-05 | 0.000317907 |
| ENSG00000166598.8  | HSP90B1       | 6525.836501 | 0.528727363 | 0.126125074 | 4.192087642 | 2.76399E-05 | 0.000319099 |
| ENSG00000182809.6  | CRIP2         | 86.16840771 | 0.620783544 | 0.148087227 | 4.192012742 | 0.000027649 | 0.000319099 |
| ENSG00000230825.1  | AC005532.5    | 1.914956378 | 2.318560233 | 0.55332315  | 4.190246214 | 2.78652E-05 | 0.000321444 |
| ENSG00000102007.6  | PLP2          | 390.4059229 | 0.453336947 | 0.108235565 | 4.188428694 | 2.80893E-05 | 0.000323879 |
| ENSG00000123146.15 | CD97          | 423.1168372 | 0.524192566 | 0.1251759   | 4.187647667 | 2.81861E-05 | 0.000324544 |
| ENSG00000102119.6  | EMD           | 79.81692924 | 0.271334951 | 0.064806038 | 4.186877647 | 2.82818E-05 | 0.000325496 |
| ENSG00000149480.2  | MTA2          | 753.2103002 | 0.245987887 | 0.058780374 | 4.184864309 | 2.85336E-05 | 0.000328091 |
| ENSG00000094963.9  | FMO2          | 12.05670915 | 1.356995391 | 0.324340261 | 4.183863529 | 2.86599E-05 | 0.000329387 |
| ENSG00000116663.6  | FBXO6         | 77.32498843 | 0.852101426 | 0.203789402 | 4.18128429  | 2.89867E-05 | 0.000332993 |
| ENSG00000179051.9  | RCO2          | 700.3564112 | 0.339166531 | 0.081132123 | 4.180422254 | 2.90968E-05 | 0.000334104 |
| ENSG00000171777.11 | RASGRP4       | 24.77883095 | 0.907461    | 0.217097697 | 4.179966033 | 2.91553E-05 | 0.00033462  |
| ENSG00000181577.11 | C6orf223      | 18.99518615 | 1.756834001 | 0.420381525 | 4.1791418   | 2.92611E-05 | 0.000335371 |
| ENSG00000062598.13 | ELMO2         | 211.2685962 | 0.31449198  | 0.075264651 | 4.178481894 | 2.93461E-05 | 0.000336191 |
| ENSG00000138755.5  | CXCL9         | 599.6855503 | 2.150558598 | 0.51486933  | 4.176901734 | 2.95507E-05 | 0.000338223 |
| ENSG00000065328.12 | MCM10         | 66.76005577 | 0.63256581  | 0.15147766  | 4.175967677 | 2.96722E-05 | 0.000339413 |
| ENSG00000158234.8  | FAIM          | 41.79724091 | 0.365444784 | 0.087512962 | 4.175893203 | 2.96819E-05 | 0.000339413 |
| ENSG00000149428.14 | HYOU1         | 1602.917427 | 0.534125308 | 0.1279141   | 4.175656224 | 2.97128E-05 | 0.00033961  |
| ENSG00000100055.16 | CYTH4         | 232.3433092 | 0.745328746 | 0.178517507 | 4.175101704 | 2.97853E-05 | 0.000340282 |
| ENSG00000139567.8  | ACVRL1        | 932.0114219 | 0.480497326 | 0.115210778 | 4.170593519 | 3.03807E-05 | 0.000346132 |
| ENSG00000141582.10 | CBX4          | 109.8119127 | 0.526133868 | 0.126224451 | 4.168240508 | 0.000030696 | 0.000349244 |
| ENSG000000211679.2 | IGLC3         | 2261.015134 | 1.258753706 | 0.302063893 | 4.167176998 | 3.08395E-05 | 0.000350556 |
| ENSG00000104332.7  | SFRP1         | 113.7839141 | 1.178535685 | 0.283051072 | 4.163685645 | 3.13151E-05 | 0.000355314 |
| ENSG00000152402.6  | GUCY1A2       | 70.70183181 | 0.676655857 | 0.162566726 | 4.162326906 | 3.15021E-05 | 0.00035711  |
| ENSG00000261625.1  | RP11-554A11.4 | 3.925700772 | 1.109483693 | 0.266572222 | 4.162037904 | 0.000031542 | 0.000357399 |
| ENSG00000196569.7  | LAMA2         | 321.1028475 | 0.711666279 | 0.171025448 | 4.161171843 | 3.16619E-05 | 0.000358269 |
| ENSG00000178878.8  | APOLD1        | 73.60413494 | 0.618483191 | 0.148638601 | 4.160986355 | 3.16876E-05 | 0.000358397 |
| ENSG00000197696.5  | NMB           | 7.865165298 | 0.781032637 | 0.187715258 | 4.160730711 | 3.17231E-05 | 0.000358635 |
| ENSG00000066336.7  | SPI1          | 116.9394608 | 0.838105212 | 0.201526934 | 4.158775182 | 3.19959E-05 | 0.000361063 |
| ENSG00000143799.8  | PARP1         | 715.9803046 | 0.377352861 | 0.090741468 | 4.158549224 | 3.20275E-05 | 0.000361257 |
| ENSG00000119508.13 | NR4A3         | 46.27773374 | 1.685913235 | 0.40559025  | 4.156690734 | 3.22891E-05 | 0.000363877 |
| ENSG00000241244.1  | IGKV1D-16     | 20.15031949 | 1.443608283 | 0.347451558 | 4.15484763  | 3.25504E-05 | 0.000366267 |
| ENSG00000189377.4  | CXCL17        | 0.505398072 | 4.890692604 | 1.178115611 | 4.1512841   | 3.30615E-05 | 0.000370903 |
| ENSG00000165409.11 | TSHR          | 5.196958339 | 1.316308677 | 0.317144741 | 4.150498205 | 3.31752E-05 | 0.000371891 |
| ENSG00000188820.8  | FAM26F        | 86.90915989 | 1.220991222 | 0.294188822 | 4.150365786 | 3.31944E-05 | 0.000371891 |
| ENSG00000013297.6  | CLDN11        | 7.918407198 | 1.444987477 | 0.348268487 | 4.149061808 | 3.33841E-05 | 0.000373848 |
| ENSG00000006074.4  | CCL18         | 105.3416413 | 1.658636491 | 0.399889934 | 4.147732543 | 3.35784E-05 | 0.000375855 |
| ENSG00000157350.8  | ST3GAL2       | 194.312327  | 0.50478617  | 0.121731493 | 4.146717973 | 3.37275E-05 | 0.000377354 |
| ENSG00000141682.11 | PMAIP1        | 54.58670948 | 0.806085167 | 0.194582895 | 4.14263118  | 3.43344E-05 | 0.000383283 |
| ENSG00000104213.8  | PDGFRL        | 5.131573726 | 0.835510195 | 0.201708012 | 4.142176536 | 3.44025E-05 | 0.000383871 |
| ENSG00000141506.9  | PIK3R5        | 133.5606279 | 0.647791714 | 0.156421218 | 4.141328919 | 3.45299E-05 | 0.00038512  |
| ENSG00000186318.12 | BACE1         | 151.6918315 | 0.461287228 | 0.111461762 | 4.13852447  | 3.49547E-05 | 0.00038931  |
| ENSG00000196209.8  | SIRPB2        | 26.21928595 | 0.882252974 | 0.213185123 | 4.138435935 | 3.49681E-05 | 0.00038931  |
| ENSG00000179388.8  | EGR3          | 40.98529137 | 1.561351008 | 0.37736093  | 4.137553421 | 3.51029E-05 | 0.000390635 |
| ENSG00000005059.11 | CCDC109B      | 113.0961058 | 0.644765949 | 0.155837882 | 4.137414749 | 3.51241E-05 | 0.000390697 |
| ENSG00000129038.11 | LOXL1         | 41.37996797 | 0.854317122 | 0.206528835 | 4.136551311 | 3.52565E-05 | 0.000391994 |
| ENSG00000169679.10 | BUB1          | 197.8419106 | 0.616453352 | 0.149034064 | 4.136325196 | 3.52912E-05 | 0.000392205 |
| ENSG00000106178.2  | CCL24         | 172.9366667 | 0.917766364 | 0.221921203 | 4.135550603 | 3.54105E-05 | 0.000393355 |
| ENSG00000005243.5  | COP22         | 18.72795031 | 0.655690456 | 0.158621131 | 4.133689199 | 3.56986E-05 | 0.000396379 |
| ENSG00000134470.15 | IL15RA        | 123.9442506 | 0.683568152 | 0.165618486 | 4.127366261 | 3.66942E-05 | 0.000406526 |
| ENSG00000167004.8  | PDIA3         | 106.980689  | 0.483371806 | 0.117120665 | 4.127126537 | 3.67324E-05 | 0.000406588 |
| ENSG00000189171.9  | S100A13       | 105.3627216 | 0.380336066 | 0.092237402 | 4.123447307 | 3.73244E-05 | 0.000412774 |
| ENSG00000259674.1  | RP11-356M20.1 | 16.51954894 | 0.655408585 | 0.158945355 | 4.123483743 | 3.73185E-05 | 0.000412774 |
| ENSG00000230067.3  | HSPD1P6       | 5.730286653 | 0.797867226 | 0.193647977 | 4.120193968 | 3.78554E-05 | 0.000417718 |
| ENSG00000158122.7  | AAED1         | 82.56121085 | 0.455836272 | 0.110679682 | 4.118518087 | 3.81317E-05 | 0.0004202   |



## upreg\_DEGs

|                    |              |             |             |             |             |             |             |
|--------------------|--------------|-------------|-------------|-------------|-------------|-------------|-------------|
| ENSG00000088756.8  | ARHGAP28     | 89.11822982 | 0.590702926 | 0.144290792 | 4.093836606 | 4.24293E-05 | 0.000460836 |
| ENSG00000211967.2  | IGHV3-53     | 54.26957852 | 1.70897836  | 0.417519757 | 4.093167649 | 0.000042552 | 0.000461564 |
| ENSG00000183508.4  | FAM46C       | 1199.45571  | 0.596095699 | 0.145676449 | 4.091915347 | 4.27825E-05 | 0.000463458 |
| ENSG00000087589.12 | CASS4        | 33.87841774 | 0.821701502 | 0.200904195 | 4.090016646 | 4.31342E-05 | 0.000467065 |
| ENSG00000131370.11 | SH3BP5       | 173.8913502 | 0.569334901 | 0.139236249 | 4.088984755 | 4.33265E-05 | 0.00046874  |
| ENSG00000111907.16 | TPD52L1      | 62.84041394 | 0.583003329 | 0.142593431 | 4.088570736 | 4.34039E-05 | 0.000469373 |
| ENSG00000042832.7  | TG           | 11.00006479 | 0.935268845 | 0.228918257 | 4.085601807 | 4.39627E-05 | 0.000474592 |
| ENSG00000125726.6  | CD70         | 2.768032363 | 1.543703116 | 0.377919404 | 4.084741611 | 4.41259E-05 | 0.000476147 |
| ENSG00000091106.14 | NLRC4        | 39.24558814 | 0.695921906 | 0.170390486 | 4.084276787 | 4.42143E-05 | 0.000476894 |
| ENSG00000121904.13 | CSMD2        | 7.61152553  | 1.15095343  | 0.281834798 | 4.083787517 | 4.43075E-05 | 0.000477324 |
| ENSG00000182481.4  | KPNA2        | 431.1389583 | 0.614335942 | 0.150433683 | 4.083765881 | 4.43117E-05 | 0.000477324 |
| ENSG00000152256.9  | PDK1         | 581.8252227 | 0.61129926  | 0.149719221 | 4.082971161 | 4.44635E-05 | 0.000478752 |
| ENSG00000128683.9  | GAD1         | 2.431643608 | 2.846656264 | 0.697251358 | 4.082682997 | 4.45187E-05 | 0.000479139 |
| ENSG00000106624.4  | AEBP1        | 330.9017741 | 0.870308526 | 0.213194333 | 4.082231049 | 4.46054E-05 | 0.000479865 |
| ENSG00000181143.11 | MUC16        | 6.656628117 | 1.972218594 | 0.483172012 | 4.081814641 | 4.46854E-05 | 0.000480518 |
| ENSG00000164045.7  | CDC25A       | 75.9229674  | 0.580248884 | 0.142176641 | 4.081182953 | 4.48071E-05 | 0.000481618 |
| ENSG00000183386.5  | FHL3         | 21.29720439 | 0.719136385 | 0.176260616 | 4.079960703 | 4.50433E-05 | 0.00048374  |
| ENSG00000137809.12 | ITGA11       | 55.92631009 | 0.740726795 | 0.181586798 | 4.079188597 | 4.51932E-05 | 0.00048493  |
| ENSG00000161944.12 | ASGR2        | 3.732907776 | 1.218323489 | 0.298720067 | 4.078478895 | 4.53313E-05 | 0.000485852 |
| ENSG00000103710.6  | RASL12       | 48.8772218  | 0.63207054  | 0.155000753 | 4.077854643 | 4.54532E-05 | 0.000486881 |
| ENSG0000011600.7   | TYROBP       | 199.6905945 | 0.672393365 | 0.16489871  | 4.077614469 | 4.55001E-05 | 0.000486965 |
| ENSG00000067445.16 | TRO          | 23.35178951 | 0.659711287 | 0.161809567 | 4.077084562 | 4.56039E-05 | 0.000487866 |
| ENSG00000124225.11 | PMEPA1       | 254.0310477 | 0.540141922 | 0.132488339 | 4.076901615 | 4.56398E-05 | 0.00048804  |
| ENSG00000179914.4  | ITLN1        | 3662.11379  | 1.15150436  | 0.282538254 | 4.075569749 | 4.59018E-05 | 0.00049021  |
| ENSG00000273320.1  | RP11-22N19.2 | 4.12197238  | 1.431341792 | 0.351335846 | 4.073998736 | 4.62127E-05 | 0.000492474 |
| ENSG00000102900.8  | NUBP3        | 236.1774641 | 0.356201896 | 0.087446751 | 4.073357691 | 4.63402E-05 | 0.000493621 |
| ENSG00000233966.1  | UBE2SP1      | 24.91265227 | 0.685720721 | 0.168357299 | 4.073008563 | 4.64097E-05 | 0.00049415  |
| ENSG00000137745.7  | MMP13        | 1.885744455 | 2.716134802 | 0.667015111 | 4.072073871 | 4.65964E-05 | 0.000495714 |
| ENSG00000177469.12 | PTRF         | 553.4593519 | 0.65874248  | 0.161797053 | 4.0714121   | 0.000046729 | 0.000496912 |
| ENSG00000161798.6  | AQP5         | 2.575772786 | 4.732934357 | 1.162594022 | 4.071012123 | 4.68093E-05 | 0.000497342 |
| ENSG00000106031.6  | HOXA13       | 272.6120033 | 1.874577257 | 0.460535343 | 4.07043006  | 4.69264E-05 | 0.000498161 |
| ENSG00000211961.2  | IGHV1-45     | 2.166439938 | 4.297250143 | 1.055758704 | 4.070295729 | 4.69535E-05 | 0.000498235 |
| ENSG00000188176.7  | SMTNL2       | 2.72108663  | 1.279652048 | 0.314402294 | 4.070110399 | 4.69909E-05 | 0.00049842  |
| ENSG00000266037.1  | RN7SL3       | 1071.814918 | 0.838326315 | 0.206025814 | 4.069035326 | 4.72082E-05 | 0.000500085 |
| ENSG00000108700.4  | CCL8         | 68.02885239 | 1.231602756 | 0.302908071 | 4.065929148 | 4.78415E-05 | 0.000506148 |
| ENSG00000153923.6  | CLCA3P       | 2.745456706 | 2.237761961 | 0.550475995 | 4.065139953 | 4.80036E-05 | 0.000507648 |
| ENSG00000137509.6  | PRCP         | 437.6317927 | 0.38253956  | 0.094129915 | 4.06395311  | 4.82485E-05 | 0.000509804 |
| ENSG00000094804.5  | CDC6         | 125.1760575 | 0.592376878 | 0.14577853  | 4.063539934 | 0.000048334 | 0.000510163 |
| ENSG00000105464.3  | GRIN2D       | 7.309767109 | 1.449352985 | 0.356685367 | 4.063393451 | 4.83644E-05 | 0.000510163 |
| ENSG00000138185.12 | ENTPD1       | 506.1032315 | 0.603834606 | 0.148601738 | 4.063442407 | 4.83543E-05 | 0.000510163 |
| ENSG00000232801.1  | SDCBPP3      | 9.538331501 | 0.669915978 | 0.164858413 | 4.063583803 | 0.000048325 | 0.000510163 |
| ENSG00000156127.6  | BATF         | 29.72969814 | 1.137141165 | 0.279872664 | 4.063066219 | 4.84323E-05 | 0.000510662 |
| ENSG00000123131.8  | PRDX4        | 370.432981  | 0.589324612 | 0.145120589 | 4.060930413 | 4.88775E-05 | 0.000514485 |
| ENSG00000148848.10 | ADAM12       | 32.7138507  | 1.196842332 | 0.294748099 | 4.060559969 | 4.89552E-05 | 0.000515084 |
| ENSG00000129667.8  | RHBF2        | 126.2552875 | 0.833702305 | 0.20532983  | 4.060307768 | 4.90081E-05 | 0.000515423 |
| ENSG00000157766.11 | ACAN         | 4.094782131 | 1.965069567 | 0.484091144 | 4.059296666 | 4.92207E-05 | 0.000517005 |
| ENSG00000174125.3  | TLR1         | 212.235533  | 0.658663911 | 0.162267509 | 4.059123823 | 4.92572E-05 | 0.000517169 |
| ENSG00000198909.3  | MAP3K3       | 236.4490467 | 0.36807477  | 0.090684129 | 4.058866449 | 4.93115E-05 | 0.000517521 |
| ENSG00000132274.11 | TRIM22       | 735.2299503 | 0.826472791 | 0.20364913  | 4.058317321 | 4.94276E-05 | 0.000518521 |
| ENSG00000135114.8  | OASL         | 106.2740876 | 1.136634344 | 0.280184763 | 4.056731464 | 4.97642E-05 | 0.000521394 |
| ENSG00000233013.4  | FAM157B      | 0.659419094 | 4.110541004 | 1.013438063 | 4.056035741 | 4.99126E-05 | 0.000522508 |
| ENSG00000249096.2  | RP11-290F5.1 | 43.66717178 | 0.95613516  | 0.235866253 | 4.053717508 | 5.04101E-05 | 0.000526609 |
| ENSG00000148082.5  | SHC3         | 3.807843354 | 1.622355399 | 0.400238607 | 4.053470535 | 5.04634E-05 | 0.000526944 |
| ENSG00000164171.6  | ITGA2        | 915.2137261 | 0.639372854 | 0.157755773 | 4.052928404 | 5.05805E-05 | 0.000527503 |
| ENSG00000241529.2  | RN7SL767P    | 2.581385387 | 1.272504948 | 0.314265806 | 4.04913587  | 5.14071E-05 | 0.000534333 |
| ENSG00000233276.2  | GPX1         | 401.6151899 | 0.411481663 | 0.10168814  | 4.046505949 | 5.19878E-05 | 0.000539918 |
| ENSG00000143870.8  | PDIA6        | 2229.423691 | 0.426699972 | 0.105482613 | 4.04521616  | 5.22749E-05 | 0.000541995 |
| ENSG00000126767.13 | ELK1         | 136.7997407 | 0.27830467  | 0.068806776 | 4.04472768  | 0.000052384 | 0.000542675 |
| ENSG00000118705.12 | RPN2         | 1990.15792  | 0.39889658  | 0.098626041 | 4.044536068 | 5.24268E-05 | 0.000542893 |
| ENSG00000175183.5  | CSRP2        | 41.17375518 | 0.730872979 | 0.180745291 | 4.043662623 | 5.26226E-05 | 0.000544693 |
| ENSG00000163053.6  | SLC16A14     | 66.65758876 | 0.935056852 | 0.231308709 | 4.042462808 | 5.28927E-05 | 0.00054658  |
| ENSG00000253522.2  | MIR146A      | 32.32235543 | 0.945271654 | 0.233835114 | 4.042470948 | 5.28909E-05 | 0.00054658  |
| ENSG00000135404.7  | CD63         | 2116.046356 | 0.379377708 | 0.093867966 | 4.041609986 | 5.30855E-05 | 0.000548344 |
| ENSG00000128016.4  | ZFP36        | 664.834912  | 0.851902939 | 0.210808365 | 4.041124921 | 5.31954E-05 | 0.000549252 |
| ENSG00000151718.11 | WWC2         | 89.66478956 | 0.428454813 | 0.106045897 | 4.040277118 | 5.33881E-05 | 0.000550785 |
| ENSG00000102760.12 | RGCC         | 52.60699263 | 0.675402646 | 0.167172477 | 4.040154562 | 0.000053416 | 0.000550836 |
| ENSG00000179104.4  | TMT2C        | 223.008266  | 0.398390203 | 0.098609947 | 4.040061031 | 5.34373E-05 | 0.000550836 |
| ENSG00000078081.3  | LAMP3        | 93.63266439 | 1.177090779 | 0.29141922  | 4.039166601 | 5.36415E-05 | 0.000552483 |
| ENSG00000233516.1  | RP11-388N2.1 | 2.289652406 | 1.754865263 | 0.434525431 | 4.038578954 | 0.000053776 | 0.000553639 |
| ENSG00000134830.3  | CSAR2        | 9.341683657 | 1.082810372 | 0.268244728 | 4.03665108  | 5.42196E-05 | 0.000557055 |
| ENSG00000137574.6  | TGS1         | 295.5690427 | 0.201275908 | 0.049900174 | 4.033571246 | 5.49355E-05 | 0.000563348 |
| ENSG00000159674.7  | SPON2        | 153.0899723 | 0.66560295  | 0.165024535 | 4.033357532 | 5.49855E-05 | 0.00056376  |
| ENSG00000185621.7  | LMLN         | 67.8540236  | 0.276070403 | 0.068450724 | 4.033126138 | 5.50397E-05 | 0.000564083 |
| ENSG00000165891.11 | E2F7         | 42.88772807 | 0.711179095 | 0.176434766 | 4.030833101 | 5.55795E-05 | 0.000568913 |
| ENSG00000138303.13 | ASCC1        | 107.0356302 | 0.283363897 | 0.070339091 | 4.028540807 | 5.61241E-05 | 0.000574016 |
| ENSG00000134910.8  | STT3A        | 1174.222656 | 0.423049406 | 0.105022971 | 4.028160703 | 5.62149E-05 | 0.000574472 |
| ENSG00000163754.13 | GYG1         | 154.0830557 | 0.381212304 | 0.094655023 | 4.027385891 | 5.64004E-05 | 0.000575895 |
| ENSG00000132003.5  | ZSWIM4       | 28.35902158 | 0.643339649 | 0.159747579 | 4.027226272 | 5.64387E-05 | 0.00057605  |
| ENSG00000151014.4  | CCRN4L       | 48.57756561 | 0.781190302 | 0.194036478 | 4.025997122 | 5.67344E-05 | 0.000578356 |
| ENSG00000119403.9  | PHF19        | 142.4300001 | 0.410241908 | 0.101912144 | 4.025446742 | 5.68673E-05 | 0.000579473 |
| ENSG00000124784.4  | RIOK1        | 132.5759471 | 0.280011041 | 0.069562467 | 4.025317873 | 5.68984E-05 | 0.000579554 |
| ENSG00000058085.10 | LAMC2        | 690.9281555 | 0.606868657 | 0.150799148 | 4.024350709 | 5.71327E-05 | 0.000581702 |
| ENSG00000122420.5  | PTGFR        | 80.74124101 | 0.886958407 | 0.220420638 | 4.02393539  | 5.72336E-05 | 0.000582364 |
| ENSG00000180447.5  | GAS1         | 17.76295153 | 1.377665466 | 0.34241079  | 4.023428896 | 5.73569E-05 | 0.000583031 |
| ENSG00000169744.8  | LDB2         | 73.38021961 | 0.552537666 | 0.13733984  | 4.023141897 | 5.74269E-05 | 0.000583504 |
| ENSG00000153789.8  | FAM92B       | 2.009724523 | 1.693876212 | 0.421729597 | 4.016498306 | 5.90693E-05 | 0.000597735 |
| ENSG00000092969.7  | TGFB2        | 15.41932232 | 0.857029238 | 0.21347219  | 4.014711422 | 5.95186E-05 | 0.000601077 |
| ENSG00000138821.8  | SLC39A8      | 840.2707816 | 0.541206437 | 0.134827774 | 4.014057497 | 5.96838E-05 | 0.000602257 |
| ENSG00000184575.7  | XPOT         | 418.92419   | 0.291176154 | 0.07253758  | 4.014142128 | 5.96624E-05 | 0.000602257 |
| ENSG00000075624.9  | ACTB         | 21461.61342 | 0.423735153 | 0.105634385 | 4.011337335 | 6.03758E-05 | 0.000607516 |
| ENSG00000100462.11 | PRMT5        | 266.2890125 | 0.334507426 | 0.083405455 | 4.010618099 | 0.000060526 | 0.000609124 |
| ENSG00000128594.3  | LRR4C        | 9.782807019 | 1.096425865 | 0.273703874 | 4.005883614 | 6.17861E-05 | 0.000620168 |
| ENSG00000229989.3  | MIR181A1HG   | 20.06019004 | 0.850114237 | 0.212264077 | 4.004984016 | 6.20217E-05 | 0.000621815 |
| ENSG00000120370.8  | GORAB        | 137.4485522 | 0.254535432 | 0.063587951 | 4.002887798 | 0.000062574 | 0.000626848 |
| ENSG00000126785.8  | RHOJ         | 54.41600986 | 0.583551379 | 0.145813409 | 4.002041951 | 6.27982E-05 | 0.000628588 |
| ENSG00000082805.15 | ERC1         | 450.4609613 | 0.301694212 | 0.075397181 | 4.001399108 | 0.000062969 | 0.000629539 |
| ENSG00000171310.6  |              |             |             |             |             |             |             |

## upreg\_DEGs

|                    |               |             |             |             |             |              |             |
|--------------------|---------------|-------------|-------------|-------------|-------------|--------------|-------------|
| ENSG00000117906.9  | RCN2          | 305.5402717 | 0.220896129 | 0.055398388 | 3.987410749 | 6.67983E-05  | 0.000661447 |
| ENSG00000134339.4  | SA2           | 15.57533313 | 3.031631752 | 0.760407554 | 3.986851177 | 0.000066956  | 0.000662218 |
| ENSG00000115604.6  | IL18R1        | 103.6324498 | 0.656723569 | 0.164742605 | 3.986361454 | 6.70943E-05  | 0.000663322 |
| ENSG00000134901.8  | KDEL1         | 24.08361344 | 0.46720316  | 0.117219405 | 3.985715181 | 6.72772E-05  | 0.00066408  |
| ENSG00000164970.10 | FAM219A       | 67.69052339 | 0.428600531 | 0.107535943 | 3.985649085 | 6.72959E-05  | 0.00066408  |
| ENSG00000260943.1  | RP11-476D10.1 | 0.993694042 | 4.884204044 | 1.225693537 | 3.98484931  | 0.000067523  | 0.00066571  |
| ENSG00000170581.9  | STAT2         | 1055.073257 | 0.474503886 | 0.119197038 | 3.980836231 | 6.86733E-05  | 0.000675712 |
| ENSG00000248166.1  | AC008984.2    | 0.672612229 | 3.130826131 | 0.786497764 | 3.980718415 | 6.87073E-05  | 0.00067578  |
| ENSG00000146070.12 | PLA2G7        | 116.5371933 | 0.946736969 | 0.237842223 | 3.980525229 | 6.87632E-05  | 0.000676063 |
| ENSG00000156587.11 | UBE2L6        | 470.6682557 | 0.971241908 | 0.244042709 | 3.979803019 | 6.89724E-05  | 0.000677567 |
| ENSG00000085662.9  | AKR1B1        | 144.9559832 | 0.497240173 | 0.124997841 | 3.97799008  | 6.95003E-05  | 0.000681426 |
| ENSG00000073712.9  | FERMT2        | 269.0251126 | 0.560280865 | 0.140868865 | 3.977322223 | 6.96957E-05  | 0.000682962 |
| ENSG00000161980.5  | POLR3K        | 32.50078594 | 0.475222668 | 0.119484724 | 3.977267158 | 6.97118E-05  | 0.000682962 |
| ENSG00000134853.7  | PDGFRA        | 1293.077702 | 0.452394197 | 0.113766577 | 3.976512329 | 6.99334E-05  | 0.000684325 |
| ENSG00000235831.2  | BHLHE40-AS1   | 9.167225375 | 0.734860019 | 0.184837633 | 3.975705637 | 7.01709E-05  | 0.000686379 |
| ENSG00000198937.8  | CCDC167       | 41.14910484 | 0.567951001 | 0.14292432  | 3.973788368 | 7.07384E-05  | 0.000691116 |
| ENSG00000107984.5  | DKK1          | 4.059094675 | 1.572064219 | 0.395748175 | 3.972385268 | 7.11565E-05  | 0.000694655 |
| ENSG00000171860.4  | C3AR1         | 112.5300679 | 0.689779612 | 0.173698552 | 3.971130463 | 7.15324E-05  | 0.000697777 |
| ENSG00000185275.6  | CD24P4        | 293.2768324 | 0.830825928 | 0.209336362 | 3.968856246 | 7.22184E-05  | 0.000703367 |
| ENSG00000211671.2  | IGLV2-8       | 348.2095389 | 1.326519982 | 0.334343387 | 3.967537667 | 0.000072699  | 0.000706992 |
| ENSG00000164430.11 | MB21D1        | 120.0544849 | 0.595382265 | 0.150165669 | 3.964836101 | 7.34464E-05  | 0.000713733 |
| ENSG00000172935.8  | MRGPRF        | 52.64272285 | 0.867084193 | 0.218689879 | 3.964903166 | 7.34257E-05  | 0.000713733 |
| ENSG00000018408.10 | WWTR1         | 214.9974482 | 0.45740551  | 0.115371738 | 3.964623569 | 7.35119E-05  | 0.000714009 |
| ENSG00000126778.7  | SIX1          | 0.797850813 | 2.813566058 | 0.709690289 | 3.964498462 | 7.35504E-05  | 0.000714105 |
| ENSG00000123728.5  | RAP2C         | 396.6179847 | 0.244390279 | 0.061653124 | 3.96395616  | 7.37178E-05  | 0.000715451 |
| ENSG00000187688.10 | TRPV2         | 115.5169554 | 0.598780242 | 0.151129104 | 3.962044541 | 7.43107E-05  | 0.000719802 |
| ENSG00000125347.9  | IRF1          | 1283.319507 | 0.79454984  | 0.200600623 | 3.960854293 | 7.46821E-05  | 0.000722837 |
| ENSG00000212719.6  | C17orf51      | 33.1423653  | 0.501446474 | 0.126626075 | 3.960056987 | 7.49319E-05  | 0.000724973 |
| ENSG00000120949.10 | TNFRSF8       | 6.293545765 | 1.150395687 | 0.290554786 | 3.959307301 | 7.51675E-05  | 0.000726969 |
| ENSG00000204482.6  | LST1          | 73.50392873 | 0.656980639 | 0.165978403 | 3.958229674 | 7.55073E-05  | 0.000729973 |
| ENSG00000102401.15 | ARMCX3        | 403.9136188 | 0.302602577 | 0.076491698 | 3.956018567 | 7.62092E-05  | 0.000735901 |
| ENSG00000054967.8  | RELT          | 98.95013186 | 0.798260212 | 0.201844456 | 3.954828517 | 7.65896E-05  | 0.000739287 |
| ENSG00000109625.14 | CPZ           | 1.03657002  | 2.096564174 | 0.530243876 | 3.953962075 | 7.68678E-05  | 0.000741683 |
| ENSG00000153234.9  | NR4A2         | 68.7822307  | 1.310167459 | 0.33139074  | 3.953542755 | 7.70025E-05  | 0.000742409 |
| ENSG00000101974.10 | ATP11C        | 387.6933391 | 0.246317874 | 0.062318272 | 3.952578719 | 7.73135E-05  | 0.000745119 |
| ENSG00000004660.10 | CAMKK1        | 50.04021555 | 0.387933323 | 0.098236173 | 3.948986514 | 7.84828E-05  | 0.000754344 |
| ENSG00000148516.17 | ZEB1          | 319.8318523 | 0.488057382 | 0.123606393 | 3.948480084 | 0.000078649  | 0.000755649 |
| ENSG00000188596.5  | C12orf55      | 19.6123435  | 0.891043715 | 0.22568358  | 3.948199126 | 7.87413E-05  | 0.000756245 |
| ENSG00000175832.8  | ETV4          | 27.42191814 | 0.788249398 | 0.199688394 | 3.947397158 | 7.90054E-05  | 0.000758196 |
| ENSG00000116285.8  | ERRF1         | 435.6939331 | 0.621331661 | 0.157507896 | 3.944765165 | 7.98782E-05  | 0.000765687 |
| ENSG00000150556.12 | LYPD6B        | 12.50986204 | 1.320401035 | 0.334810031 | 3.94373201  | 8.02233E-05  | 0.000768107 |
| ENSG00000267534.1  | S1PR2         | 17.54888023 | 0.846048392 | 0.214547324 | 3.943411533 | 8.03306E-05  | 0.000768249 |
| ENSG00000134697.8  | GNL2          | 356.3874405 | 0.287873331 | 0.07302746  | 3.941987431 | 8.08092E-05  | 0.000771936 |
| ENSG00000159261.6  | CLDN14        | 1.541897303 | 1.989934694 | 0.504801952 | 3.942010693 | 8.08014E-05  | 0.000771936 |
| ENSG00000169604.15 | ANTXR1        | 398.8736896 | 0.536109689 | 0.136034096 | 3.940994965 | 8.11443E-05  | 0.000774332 |
| ENSG00000201955.1  | RNY3P1        | 9.044480304 | 0.916254944 | 0.232494881 | 3.940968253 | 8.11534E-05  | 0.000774332 |
| ENSG00000058262.5  | SEC61A1       | 2144.465484 | 0.352489971 | 0.089519589 | 3.937573623 | 8.23097E-05  | 0.000784463 |
| ENSG00000037897.12 | METTL1        | 25.09934839 | 0.589396818 | 0.14972202  | 3.936607455 | 8.26416E-05  | 0.000786935 |
| ENSG00000175065.7  | DSG4          | 4.165676015 | 1.056634471 | 0.268416865 | 3.936542776 | 8.26639E-05  | 0.000786935 |
| ENSG00000234602.3  | MCIDAS        | 0.791993636 | 2.464568759 | 0.626289399 | 3.935191565 | 8.31304E-05  | 0.000790771 |
| ENSG00000240671.1  | IGKV1-8       | 9.194485899 | 1.403169036 | 0.356769573 | 3.932984038 | 8.38978E-05  | 0.000797462 |
| ENSG00000135074.11 | ADAM19        | 372.3827686 | 0.803361062 | 0.204354961 | 3.931204103 | 8.45215E-05  | 0.000802777 |
| ENSG00000151468.9  | CCDC3         | 40.71495223 | 0.864139032 | 0.219911721 | 3.929481459 | 8.51292E-05  | 0.000807933 |
| ENSG00000186188.6  | FFAR4         | 167.0328221 | 0.889481604 | 0.226653997 | 3.924402907 | 8.69451E-05  | 0.000824224 |
| ENSG00000197272.2  | IL27          | 1.521819614 | 2.593843567 | 0.661033908 | 3.923919083 | 0.000087512  | 0.000825567 |
| ENSG00000178033.5  | FAM26E        | 48.03330488 | 0.558904292 | 0.142541683 | 3.920988457 | 8.81865E-05  | 0.000834583 |
| ENSG00000219438.4  | FAM19A5       | 8.812091782 | 0.909310658 | 0.231967988 | 3.919983382 | 8.85551E-05  | 0.000837572 |
| ENSG00000170027.5  | YWHAG         | 1001.938645 | 0.27556119  | 0.070305048 | 3.91950791  | 8.87299E-05  | 0.000838752 |
| ENSG00000047849.17 | MAP4          | 1170.0226   | 0.203721705 | 0.052052113 | 3.913802817 | 9.08538E-05  | 0.000857035 |
| ENSG00000136560.9  | TANK          | 468.2070748 | 0.289564633 | 0.074025988 | 3.911661856 | 9.16632E-05  | 0.000864342 |
| ENSG00000204899.5  | MZT1          | 109.8867651 | 0.365982991 | 0.093572871 | 3.911208322 | 9.18355E-05  | 0.000865639 |
| ENSG00000004700.11 | RECQL         | 365.7600487 | 0.398735431 | 0.101970954 | 3.91028441  | 9.21875E-05  | 0.0008683   |
| ENSG00000256391.1  | SDIM1         | 0.861365072 | 2.657900814 | 0.679704714 | 3.910375723 | 9.21527E-05  | 0.0008683   |
| ENSG00000198604.6  | BAZ1A         | 845.3968947 | 0.298285618 | 0.076290536 | 3.909863989 | 9.23481E-05  | 0.000869483 |
| ENSG00000214049.6  | UCA1          | 8.928830147 | 1.929890953 | 0.493699785 | 3.909037461 | 9.26646E-05  | 0.000872133 |
| ENSG00000211638.2  | IGLV8-61      | 178.2734256 | 2.104982046 | 0.53861571  | 3.908133402 | 9.30119E-05  | 0.000874741 |
| ENSG00000158485.6  | CD1B          | 2.360143093 | 1.730829489 | 0.443028292 | 3.9068148   | 9.35208E-05  | 0.000878641 |
| ENSG00000267881.1  | CEA           | 13.54213269 | 1.177757099 | 0.301545966 | 3.905729912 | 9.39414E-05  | 0.000882149 |
| ENSG00000116288.8  | PARK7         | 468.1381362 | 0.316359083 | 0.081011668 | 3.905105152 | 9.41844E-05  | 0.000884098 |
| ENSG00000171444.13 | MCC           | 199.1551334 | 0.512200846 | 0.131260447 | 3.902172047 | 9.53334E-05  | 0.000893199 |
| ENSG00000110218.4  | PANX1         | 164.0088407 | 0.388488379 | 0.099562774 | 3.901944092 | 9.54232E-05  | 0.000893405 |
| ENSG00000063587.12 | ZNF275        | 186.9326503 | 0.367229106 | 0.094120464 | 3.901692473 | 9.55225E-05  | 0.000893754 |
| ENSG00000131669.5  | NINJ1         | 166.1010817 | 0.503574205 | 0.129084289 | 3.901126998 | 9.57459E-05  | 0.000895043 |
| ENSG00000254709.2  | IGLL5         | 546.1716793 | 1.115237818 | 0.285981558 | 3.899684393 | 9.63182E-05  | 0.000899379 |
| ENSG00000199347.1  | RNU5E-1       | 56.90199502 | 0.958661353 | 0.246019262 | 3.896692256 | 9.75154E-05  | 0.000909535 |
| ENSG00000118113.7  | MMP8          | 0.930685871 | 3.852739582 | 0.98916112  | 3.894956549 | 9.82163E-05  | 0.000914702 |
| ENSG00000146094.9  | DOK3          | 79.96095491 | 0.996044322 | 0.255995748 | 3.890862761 | 9.98884E-05  | 0.000928884 |
| ENSG00000149557.8  | FEZ1          | 26.63923328 | 0.644064236 | 0.165610353 | 3.889033653 | 0.0000934864 | 0.000934864 |
| ENSG00000115828.11 | QPCT          | 64.55203362 | 0.669103609 | 0.172143013 | 3.886905406 | 0.00010153   | 0.000942041 |
| ENSG00000126759.8  | CFP           | 43.18765066 | 0.831510022 | 0.213935419 | 3.886733789 | 0.000101602  | 0.000942355 |
| ENSG00000100365.10 | NCF4          | 156.3607795 | 0.587915172 | 0.151373803 | 3.883863405 | 0.00010281   | 0.000952137 |
| ENSG00000163486.8  | SRGAP2        | 111.3059244 | 0.479624607 | 0.123533119 | 3.882558878 | 0.000103363  | 0.000956549 |
| ENSG00000077585.9  | GPR137B       | 105.3068049 | 0.524134259 | 0.135057088 | 3.880834885 | 0.000104099  | 0.000962998 |
| ENSG00000074800.9  | ENO1          | 4491.596684 | 0.401873749 | 0.103571344 | 3.880163483 | 0.000104386  | 0.000965302 |
| ENSG00000172123.8  | SLFN12        | 61.1614196  | 0.513988591 | 0.132469214 | 3.880060704 | 0.00010443   | 0.000965319 |
| ENSG00000197872.7  | FAM49A        | 126.3791904 | 0.677086068 | 0.174507686 | 3.879978487 | 0.000104466  | 0.000965319 |
| ENSG00000185897.6  | FFAR3         | 2.562781661 | 2.173579217 | 0.560337534 | 3.879053399 | 0.000104864  | 0.000968278 |
| ENSG00000130816.10 | DNMT1         | 483.428522  | 0.439554398 | 0.113319621 | 3.878890483 | 0.000104934  | 0.000968568 |
| ENSG00000076043.5  | REXO2         | 182.0767991 | 0.341649315 | 0.088146048 | 3.875945917 | 0.000106211  | 0.000978543 |
| ENSG00000105948.9  | TTC26         | 32.85950464 | 0.461543008 | 0.119116749 | 3.874711274 | 0.000106751  | 0.000983154 |
| ENSG00000115204.10 | MPV17         | 139.700292  | 0.230383874 | 0.059461977 | 3.874473859 | 0.000106855  | 0.000983385 |
| ENSG00000143110.7  | C1orf162      | 59.07555817 | 0.83605113  | 0.215805399 | 3.87409738  | 0.000107021  | 0.000984542 |
| ENSG00000044574.7  | HSPA5         | 1884.747372 | 0.651132587 | 0.168087066 | 3.873781617 | 0.000107159  | 0.000985399 |
| ENSG00000089041.12 | P2RX7         | 34.25067343 | 0.88434606  | 0.228294776 | 3.873702569 | 0.000107194  | 0.000985399 |
| ENSG00000187024.9  | PTRH1         | 22.8449709  | 0.560578441 | 0.144738467 | 3.873043932 | 0.000107484  | 0.00098735  |
| ENSG00000248329.1  | RP11-         |             |             |             |             |              |             |

upreg\_DEGs

|                    |                  |             |             |             |             |             |             |
|--------------------|------------------|-------------|-------------|-------------|-------------|-------------|-------------|
| ENSG00000163931.11 | TKT              | 844.3009698 | 0.362041884 | 0.093876086 | 3.856593294 | 0.000114978 | 0.001046151 |
| ENSG00000225614.2  | ZNF469           | 34.82978459 | 0.776692152 | 0.201436646 | 3.855763921 | 0.000115369 | 0.001048554 |
| ENSG00000241755.1  | IGKV1-9          | 143.3837261 | 1.427714795 | 0.370266862 | 3.855907566 | 0.000115301 | 0.001048554 |
| ENSG00000113070.6  | HBEGF            | 161.2136851 | 1.090546142 | 0.282851348 | 3.855545151 | 0.000115472 | 0.00104911  |
| ENSG00000106511.5  | MEOX2            | 8.622263217 | 1.364450016 | 0.353911034 | 3.855347488 | 0.000115565 | 0.001049575 |
| ENSG00000232810.3  | TNF              | 44.48478737 | 0.991044455 | 0.257085463 | 3.854922196 | 0.000115766 | 0.001050634 |
| ENSG00000155115.6  | GTF3C6           | 158.0074151 | 0.368759302 | 0.09572943  | 3.852099645 | 0.000117109 | 0.001060502 |
| ENSG00000173821.15 | RNF213           | 5555.372035 | 0.627415399 | 0.16289358  | 3.851688938 | 0.000117306 | 0.001061896 |
| ENSG00000144118.9  | RALB             | 597.2799929 | 0.432417776 | 0.112286399 | 3.851025417 | 0.000117624 | 0.001064391 |
| ENSG00000239855.1  | IGKV1-6          | 39.64327687 | 1.347705649 | 0.350144627 | 3.848997086 | 0.000118602 | 0.001072852 |
| ENSG00000180198.11 | RCC1             | 217.8981554 | 0.3512446   | 0.091259931 | 3.84883703  | 0.00011868  | 0.001072949 |
| ENSG00000108179.9  | PPIF             | 317.3991893 | 0.445770857 | 0.115839879 | 3.848164051 | 0.000119006 | 0.001074554 |
| ENSG00000110651.7  | CD81             | 610.7679525 | 0.457949054 | 0.119048338 | 3.846748834 | 0.000119696 | 0.001079011 |
| ENSG00000184220.6  | CMSS1            | 56.19716783 | 0.381608491 | 0.099206007 | 3.846626847 | 0.000119755 | 0.001079011 |
| ENSG00000234362.1  | AC104654.2       | 0.589619007 | 2.186021114 | 0.568297084 | 3.846616808 | 0.00011976  | 0.001079011 |
| ENSG00000184979.9  | USP18            | 39.21708364 | 0.828442628 | 0.215418669 | 3.845732733 | 0.000120193 | 0.001082517 |
| ENSG00000005001.5  | PRSS22           | 11.75287073 | 1.647857258 | 0.428567731 | 3.845033443 | 0.000120536 | 0.001085216 |
| ENSG00000237513.1  | RP11-325F22.2    | 11.96547852 | 1.001268471 | 0.260449108 | 3.844392017 | 0.000120852 | 0.001087665 |
| ENSG00000164949.3  | GEM              | 145.7119529 | 0.850675891 | 0.221289847 | 3.844170458 | 0.000120961 | 0.001088255 |
| ENSG00000138496.12 | PARP9            | 839.8849271 | 0.748410435 | 0.194719324 | 3.843534484 | 0.000121275 | 0.001090398 |
| ENSG00000172269.12 | DPAGT1           | 185.3355012 | 0.341394669 | 0.088823659 | 3.843510547 | 0.000121287 | 0.001090398 |
| ENSG00000184988.4  | TMEM106A         | 102.4740769 | 0.470686162 | 0.122472935 | 3.843185129 | 0.000121448 | 0.001091058 |
| ENSG00000204131.6  | NHSL2            | 32.08814624 | 0.666894714 | 0.173526345 | 3.843190005 | 0.000121445 | 0.001091058 |
| ENSG00000103202.8  | NME4             | 94.29054319 | 0.443718021 | 0.115464785 | 3.842886148 | 0.000121596 | 0.001091994 |
| ENSG00000162804.9  | SNED1            | 148.6571785 | 0.623041084 | 0.162167267 | 3.841965731 | 0.000122053 | 0.001095308 |
| ENSG00000120262.8  | CCDC170          | 47.89715429 | 0.753061853 | 0.196014323 | 3.841871563 | 0.000122121 | 0.001095334 |
| ENSG00000117395.6  | EBNA1BP2         | 214.1754567 | 0.327556667 | 0.085270591 | 3.841379119 | 0.000122345 | 0.001097138 |
| ENSG00000107937.14 | GTBPB4           | 332.9067324 | 0.267009857 | 0.069516769 | 3.840941678 | 0.000122563 | 0.001098304 |
| ENSG00000072401.10 | UBE2D1           | 259.991266  | 0.385555472 | 0.100464552 | 3.837726495 | 0.000124179 | 0.001110382 |
| ENSG00000158042.8  | MRPL17           | 175.9932347 | 0.334974492 | 0.087304178 | 3.836866702 | 0.000124614 | 0.001113875 |
| ENSG00000141314.8  | RHBDL3           | 6.777067169 | 1.004348862 | 0.26179128  | 3.836448875 | 0.000124826 | 0.001114197 |
| ENSG00000133131.10 | MORC4            | 152.0084675 | 0.345470852 | 0.090058705 | 3.836062861 | 0.000125022 | 0.001115523 |
| ENSG00000163393.8  | SLC22A15         | 30.59995627 | 0.5187839   | 0.135236557 | 3.836121771 | 0.000124993 | 0.001115523 |
| ENSG00000259856.1  | RAB43P1          | 24.76725515 | 0.611393022 | 0.159374781 | 3.836196786 | 0.000124954 | 0.001115523 |
| ENSG00000236452.1  | AC123023.1       | 0.872940758 | 1.901761101 | 0.496130738 | 3.833185395 | 0.000126495 | 0.001127446 |
| ENSG00000230006.3  | ANKRD36BP2       | 386.4058073 | 1.028821511 | 0.268499182 | 3.831749151 | 0.000127235 | 0.001133643 |
| ENSG0000015475.14  | BID              | 202.2906272 | 0.366623895 | 0.095730416 | 3.829753483 | 0.000128272 | 0.001140427 |
| ENSG00000203883.5  | SOX18            | 13.25730683 | 0.909470268 | 0.237627409 | 3.827295309 | 0.000129559 | 0.001149409 |
| ENSG00000207834.1  | D86994.2         | 8.53406829  | 1.592215682 | 0.416210615 | 3.825504743 | 0.000130504 | 0.001156566 |
| ENSG00000142684.7  | ZNF593           | 46.16381471 | 0.418693364 | 0.109494958 | 3.823859744 | 0.000131379 | 0.001163479 |
| ENSG00000101361.10 | NOP56            | 432.1209194 | 0.343900463 | 0.09000284  | 3.820995702 | 0.000132914 | 0.001175403 |
| ENSG00000075131.5  | TIPIN            | 37.49457294 | 0.46693354  | 0.122304217 | 3.817804107 | 0.000134645 | 0.001188598 |
| ENSG00000184445.7  | KNTC1            | 495.9706395 | 0.32264349  | 0.084515736 | 3.81755525  | 0.000134781 | 0.001188954 |
| ENSG00000111012.5  | CYP27B1          | 12.13148738 | 1.074670626 | 0.281549573 | 3.816985454 | 0.000135092 | 0.001191189 |
| ENSG00000198053.7  | SIRPA            | 268.3895825 | 0.504719424 | 0.132232231 | 3.816916809 | 0.00013513  | 0.001191189 |
| ENSG00000101447.9  | FAM83D           | 96.0456267  | 0.690354977 | 0.180929987 | 3.815591805 | 0.000135857 | 0.001197176 |
| ENSG00000261295.1  | RP11-524D16__A.3 | 1.955606723 | 1.598522056 | 0.419189304 | 3.813365566 | 0.000137087 | 0.001207162 |
| ENSG00000148541.8  | FAM13C           | 58.40341893 | 0.616556245 | 0.161688063 | 3.813245301 | 0.000137154 | 0.001207323 |
| ENSG00000153292.11 | GPR110           | 31.24388149 | 1.72971038  | 0.453793348 | 3.811669753 | 0.000138031 | 0.001213758 |
| ENSG00000152229.14 | PSTPIP2          | 102.128678  | 0.806146093 | 0.211646109 | 3.808934145 | 0.000139567 | 0.001224237 |
| ENSG00000130303.8  | BST2             | 195.7636059 | 0.829485282 | 0.21778368  | 3.808757758 | 0.000139667 | 0.001224679 |
| ENSG00000133874.1  | RNF122           | 31.0144592  | 0.587541385 | 0.154271583 | 3.808487441 | 0.000139819 | 0.001225155 |
| ENSG00000211968.2  | IGHV1-58         | 9.847827997 | 2.10781097  | 0.553564091 | 3.807708994 | 0.00014026  | 0.001228585 |
| ENSG00000176826.11 | FKBP9L           | 6.325585491 | 0.908306287 | 0.238607207 | 3.806700971 | 0.000140833 | 0.001232733 |
| ENSG00000213500.3  | LAP3P2           | 13.71419879 | 1.095549446 | 0.287963921 | 3.804467735 | 0.000142109 | 0.001243033 |
| ENSG00000272914.1  | RP11-330O11.3    | 2.773535265 | 0.92592076  | 0.243394688 | 3.804194612 | 0.000142266 | 0.001243968 |
| ENSG00000166562.4  | SEC11C           | 412.0146263 | 0.449641685 | 0.118290279 | 3.801171894 | 0.000144013 | 0.001257919 |
| ENSG00000049249.4  | TNFRSF9          | 19.719295   | 1.403860337 | 0.369341975 | 3.800976962 | 0.000144127 | 0.001258467 |
| ENSG00000110852.4  | CLECS2B          | 110.3711163 | 0.57585799  | 0.151535204 | 3.800159806 | 0.000144603 | 0.001262182 |
| ENSG00000167693.12 | NXN              | 60.17466628 | 0.656070449 | 0.172712201 | 3.798634058 | 0.000145496 | 0.001268641 |
| ENSG00000123685.4  | BATF3            | 13.09878392 | 0.814016078 | 0.214313965 | 3.798240957 | 0.000145727 | 0.001269449 |
| ENSG00000224367.2  | OACYLP           | 0.804669051 | 2.621968836 | 0.690325467 | 3.798163273 | 0.000145772 | 0.001269449 |
| ENSG00000099250.13 | NRP1             | 647.4851491 | 0.412241372 | 0.108592524 | 3.796222404 | 0.000146918 | 0.001278354 |
| ENSG00000123219.8  | CENPK            | 88.71614444 | 0.476353643 | 0.125568372 | 3.793579819 | 0.000148491 | 0.001291139 |
| ENSG00000239713.3  | APOBEC3G         | 110.1731497 | 0.721302745 | 0.190175708 | 3.79282272  | 0.000148945 | 0.001294631 |
| ENSG00000149798.3  | CDC42EP2         | 82.38907795 | 0.59320481  | 0.156411871 | 3.792581769 | 0.000149089 | 0.001295436 |
| ENSG00000186094.12 | AGBL4            | 2.132581208 | 1.30040822  | 0.342953901 | 3.791787218 | 0.000149567 | 0.001299135 |
| ENSG00000128262.4  | POM121L9P        | 5.921669643 | 1.177772558 | 0.310798475 | 3.789505595 | 0.000150947 | 0.001308842 |
| ENSG00000196154.7  | S100A4           | 203.9094573 | 0.615978695 | 0.162563269 | 3.78916283  | 0.000151156 | 0.001309737 |
| ENSG00000087263.12 | OGFOD1           | 255.0514291 | 0.285201769 | 0.07528704  | 3.788192071 | 0.000151748 | 0.001313949 |
| ENSG00000212747.3  | FAM127C          | 13.97387406 | 0.58121601  | 0.153436715 | 3.787985223 | 0.000151874 | 0.001314586 |
| ENSG00000072864.8  | NDE1             | 165.8752463 | 0.395461569 | 0.104430361 | 3.786844803 | 0.000152572 | 0.001319714 |
| ENSG00000060656.15 | PTPRU            | 20.31628103 | 0.988488507 | 0.261056683 | 3.786489956 | 0.00015279  | 0.001320508 |
| ENSG00000033170.12 | FUT8             | 631.176047  | 0.415403748 | 0.109771334 | 3.784264357 | 0.000154164 | 0.001331168 |
| ENSG00000109320.7  | NFKB1            | 637.9154462 | 0.239246032 | 0.063220604 | 3.78430475  | 0.000154139 | 0.001331168 |
| ENSG00000106628.6  | POLD2            | 219.2206508 | 0.344110452 | 0.090951247 | 3.783460516 | 0.000154663 | 0.001333626 |
| ENSG00000122970.11 | IFT81            | 63.441461   | 0.421682559 | 0.111452883 | 3.783505166 | 0.000154635 | 0.001333626 |
| ENSG00000137440.3  | FGFBP1           | 81.09735304 | 1.153127074 | 0.304869482 | 3.782363079 | 0.000155337 | 0.001338187 |
| ENSG00000206538.3  | VGLL3            | 59.54544968 | 0.823723307 | 0.217780681 | 3.782352521 | 0.000155353 | 0.001338187 |
| ENSG00000204301.5  | NOTCH4           | 62.94894331 | 0.635428533 | 0.16802273  | 3.781801036 | 0.000155698 | 0.001340692 |
| ENSG00000140464.15 | PML              | 302.968985  | 0.656850762 | 0.173755174 | 3.780323463 | 0.000156625 | 0.001347742 |
| ENSG00000304063.9  | UHRF1            | 51.14910177 | 0.653013577 | 0.172751162 | 3.780082112 | 0.000156777 | 0.001348117 |
| ENSG00000255248.2  | RP11-166D19.1    | 58.91243436 | 0.916933446 | 0.242642904 | 3.778941948 | 0.000157496 | 0.001353369 |
| ENSG00000197956.5  | S100A6           | 4837.743393 | 0.509698548 | 0.134885876 | 3.778739215 | 0.000157624 | 0.001354003 |
| ENSG00000156802.8  | ATAD2            | 371.6431916 | 0.390636866 | 0.103391697 | 3.778222806 | 0.000157952 | 0.001355878 |
| ENSG00000135148.7  | TRAFD1           | 327.5350783 | 0.489498916 | 0.1295675   | 3.77794522  | 0.000158128 | 0.001356922 |
| ENSG00000235649.2  | MXRA5P1          | 3.955312256 | 1.206025855 | 0.319286367 | 3.777254463 | 0.000158567 | 0.00136022  |
| ENSG00000102048.11 | ASB9             | 11.01577379 | 0.621822529 | 0.164704625 | 3.775379901 | 0.000159764 | 0.001368605 |
| ENSG00000137699.12 | TRIM29           | 39.00205232 | 1.395803087 | 0.369759722 | 3.774892192 | 0.000160077 | 0.001370813 |
| ENSG00000061273.13 | HDAC7            | 197.8323209 | 0.677139168 | 0.17942654  | 3.77390752  | 0.00016071  | 0.001375292 |
| ENSG00000258399.2  | MEG8             | 6.566464214 | 0.8264389   | 0.219034788 | 3.773094256 | 0.000161235 | 0.00137931  |
| ENSG00000105509.6  | HAS1             | 2.965998989 | 3.403558581 | 0.902181858 | 3.772585928 | 0.000161564 | 0.00138165  |
| ENSG00000123700.4  | KCNJ2            | 268.9640772 | 0.794336698 | 0.210623688 | 3.771355002 | 0.000162364 | 0.001387531 |
| ENSG00000260078.3  | RP11-44F14.1     | 2.870509491 | 1.603590114 | 0.425253931 | 3.770900154 | 0.000162666 | 0.001389585 |
| ENSG00000102524.7  | TNFSF13B         | 153.2982334 | 0.85785617  | 0.227624245 | 3.768738118 | 0.0001      |             |

## upreg\_DEGs

|                    |               |             |             |             |             |             |             |
|--------------------|---------------|-------------|-------------|-------------|-------------|-------------|-------------|
| ENSG00000147224.6  | PRPS1         | 96.35674216 | 0.432376609 | 0.115485247 | 3.743998657 | 0.000181115 | 0.00152063  |
| ENSG00000269071.1  | AC138517.1    | 6.441294877 | 0.922874142 | 0.246770148 | 3.739812739 | 0.000184157 | 0.001543655 |
| ENSG00000132746.10 | ALDH3B2       | 1.061471946 | 2.208404336 | 0.590558342 | 3.739519332 | 0.000184373 | 0.001544682 |
| ENSG00000116260.12 | QSOX1         | 1330.091476 | 0.533849481 | 0.142799551 | 3.738453507 | 0.000185156 | 0.001549854 |
| ENSG00000071462.7  | WBSCR22       | 179.6375618 | 0.268140773 | 0.071757023 | 3.736787854 | 0.000186386 | 0.001559628 |
| ENSG00000155099.3  | TMEM55A       | 54.92735575 | 0.506639114 | 0.135629933 | 3.735452057 | 0.000187378 | 0.001566878 |
| ENSG00000075702.12 | WDR62         | 29.84404969 | 0.72343438  | 0.193711767 | 3.734591813 | 0.00018802  | 0.001571187 |
| ENSG00000183831.6  | ANKRD45       | 2.613733727 | 1.873798623 | 0.501730578 | 3.73467097  | 0.000187961 | 0.001571187 |
| ENSG00000111711.5  | GOLT1B        | 399.8381861 | 0.40734203  | 0.10907819  | 3.734404023 | 0.00018816  | 0.001571833 |
| ENSG00000167851.9  | CD300A        | 115.6561953 | 0.607998803 | 0.162925439 | 3.731761015 | 0.000190146 | 0.001586291 |
| ENSG00000166592.7  | RRAD          | 12.26195379 | 0.745283346 | 0.199754463 | 3.730997213 | 0.000190723 | 0.00158951  |
| ENSG00000185022.7  | MAFF          | 117.7104569 | 0.794752124 | 0.213058666 | 3.730203235 | 0.000191325 | 0.001593994 |
| ENSG00000109079.5  | TNFAIP1       | 348.0339065 | 0.264646808 | 0.070953425 | 3.729866586 | 0.000191581 | 0.001595591 |
| ENSG00000091129.15 | NRCAM         | 30.78267175 | 1.041218654 | 0.279185758 | 3.72948341  | 0.000191873 | 0.001596501 |
| ENSG00000244038.5  | DDOST         | 1435.662125 | 0.293876743 | 0.078798379 | 3.729477011 | 0.000191878 | 0.001596501 |
| ENSG00000206075.9  | SERPINB5      | 367.5901065 | 1.166467484 | 0.312865997 | 3.728329362 | 0.000192753 | 0.001602811 |
| ENSG00000244682.3  | FCGR2C        | 42.61177091 | 0.89709071  | 0.240645448 | 3.727852402 | 0.000193118 | 0.001604636 |
| ENSG00000134686.12 | PHC2          | 373.6360495 | 0.326916249 | 0.087751185 | 3.72549098  | 0.000194935 | 0.001616563 |
| ENSG00000198729.4  | PPP1R14C      | 100.4211311 | 0.822107737 | 0.220664136 | 3.72560649  | 0.000194846 | 0.001616563 |
| ENSG00000223749.3  | MIR503HG      | 3.019002819 | 1.075703962 | 0.288800738 | 3.724727189 | 0.000195527 | 0.001620859 |
| ENSG00000006125.12 | AP2B1         | 1597.19643  | 0.327796774 | 0.08801766  | 3.724215957 | 0.000195923 | 0.001623528 |
| ENSG00000213886.3  | UBD           | 93.22044142 | 1.797507438 | 0.482663249 | 3.724143994 | 0.000195979 | 0.001623528 |
| ENSG00000136630.11 | HLX           | 31.46258993 | 0.799637472 | 0.214762477 | 3.723357459 | 0.000196591 | 0.001628055 |
| ENSG00000128294.11 | TPST2         | 147.0515085 | 0.405592362 | 0.108984029 | 3.72157613  | 0.000197983 | 0.00163904  |
| ENSG00000048991.12 | R3HDM1        | 201.1558367 | 0.278451356 | 0.074831432 | 3.721048077 | 0.000198398 | 0.001640391 |
| ENSG00000137710.10 | RDX           | 289.6729832 | 0.461932484 | 0.124138559 | 3.721103955 | 0.000198354 | 0.001640391 |
| ENSG00000091831.17 | ESR1          | 15.22755242 | 0.786919515 | 0.21161067  | 3.718713786 | 0.00020024  | 0.001652775 |
| ENSG00000035862.8  | TIMP2         | 744.5676425 | 0.438299375 | 0.117913121 | 3.717138269 | 0.000201492 | 0.00166201  |
| ENSG00000161091.8  | MFSD12        | 203.2611211 | 0.429629156 | 0.115597919 | 3.716582093 | 0.000201936 | 0.001664568 |
| ENSG00000203995.5  | ZYG11A        | 3.397305886 | 1.448193317 | 0.389652296 | 3.716629754 | 0.000201898 | 0.001664568 |
| ENSG00000198792.8  | TMEM184B      | 248.1604745 | 0.419141236 | 0.11278692  | 3.716222011 | 0.000202224 | 0.001666389 |
| ENSG00000135334.8  | AKIRIN2       | 101.0955807 | 0.425849894 | 0.114597784 | 3.716039519 | 0.00020237  | 0.001667041 |
| ENSG00000234389.1  | AC007278.3    | 3.03906108  | 1.251668304 | 0.336978309 | 3.71438834  | 0.000203696 | 0.001676853 |
| ENSG00000169756.12 | LIMS1         | 520.0458439 | 0.307829116 | 0.082885708 | 3.71389864  | 0.000204091 | 0.001679547 |
| ENSG00000182827.8  | ACBD3         | 696.0960191 | 0.324134674 | 0.087286491 | 3.713457509 | 0.000204447 | 0.001681923 |
| ENSG00000163083.5  | INHBB         | 8.187483705 | 1.035100726 | 0.278808134 | 3.71259157  | 0.000205148 | 0.001686262 |
| ENSG00000213406.3  | ANXA2P1       | 24.0018673  | 0.60855508  | 0.163921822 | 3.712471422 | 0.000205245 | 0.001686262 |
| ENSG00000111700.8  | SLCO1B3       | 5.711327099 | 3.413598143 | 0.919831127 | 3.711113967 | 0.000206349 | 0.001693872 |
| ENSG000000011201.6 | KAL1          | 25.87656053 | 0.748683919 | 0.201844247 | 3.709216033 | 0.000207902 | 0.001704153 |
| ENSG00000161649.8  | CD300LG       | 1.640633327 | 1.497852401 | 0.403817117 | 3.709234545 | 0.000207887 | 0.001704153 |
| ENSG00000169071.10 | ROR2          | 44.89563978 | 0.673801968 | 0.181665915 | 3.709017002 | 0.000208066 | 0.001704931 |
| ENSG00000131386.13 | GALNT15       | 32.79568547 | 1.164489078 | 0.314098388 | 3.707402279 | 0.000209396 | 0.001713579 |
| ENSG00000131019.6  | ULBP3         | 3.563507745 | 0.995961989 | 0.268718085 | 3.70634522  | 0.000210272 | 0.001720178 |
| ENSG00000108771.8  | DHX58         | 95.20932034 | 0.428655471 | 0.115675571 | 3.705669825 | 0.000210833 | 0.001723947 |
| ENSG00000165271.12 | NOL6          | 222.7350002 | 0.376677831 | 0.101650309 | 3.705624079 | 0.000210871 | 0.001723947 |
| ENSG00000120725.8  | SIL1          | 216.722743  | 0.430866667 | 0.116293799 | 3.704984011 | 0.000211404 | 0.001726605 |
| ENSG00000146242.5  | TPBG          | 130.4617186 | 0.406097081 | 0.10963568  | 3.704059501 | 0.000212177 | 0.001731777 |
| ENSG00000212743.1  | DKFZP667F0711 | 4.753707114 | 0.892107918 | 0.240886357 | 3.703438949 | 0.000212696 | 0.001735452 |
| ENSG00000206337.6  | HCP5          | 610.8761633 | 0.453920743 | 0.122591145 | 3.702711255 | 0.000213308 | 0.001738729 |
| ENSG00000185989.9  | RASA3         | 156.9601558 | 0.576746763 | 0.1558367   | 3.700968793 | 0.000214778 | 0.001749568 |
| ENSG00000064886.9  | CHI3L2        | 50.52696908 | 1.269734509 | 0.343168969 | 3.700027173 | 0.000215576 | 0.001754924 |
| ENSG00000137692.7  | DCUN1D5       | 86.06514851 | 0.353965572 | 0.095668677 | 3.699910817 | 0.000215675 | 0.001755155 |
| ENSG00000102226.5  | USP11         | 147.3257509 | 0.36154449  | 0.097739749 | 3.699052797 | 0.000216406 | 0.001759948 |
| ENSG00000108829.9  | LRRC59        | 1246.615892 | 0.397658963 | 0.107547712 | 3.697512083 | 0.000217723 | 0.001770083 |
| ENSG00000142173.10 | COL6A2        | 1898.114368 | 0.760087355 | 0.205572733 | 3.697413287 | 0.000217808 | 0.001770193 |
| ENSG00000223806.3  | LINC00114     | 4.274317068 | 1.134766101 | 0.306919253 | 3.697278981 | 0.000217923 | 0.001770552 |
| ENSG00000211650.2  | IGLV5-45      | 61.31145642 | 1.267331567 | 0.342784595 | 3.697166054 | 0.00021802  | 0.001770761 |
| ENSG00000169710.6  | FASN          | 496.1914905 | 0.73771994  | 0.199552618 | 3.696869263 | 0.000218275 | 0.001771676 |
| ENSG00000103042.4  | SLC38A7       | 89.55253897 | 0.284650029 | 0.077017823 | 3.69589813  | 0.000219111 | 0.001777304 |
| ENSG00000105538.4  | RASIP1        | 26.5221359  | 0.665399515 | 0.18004742  | 3.695690363 | 0.00021929  | 0.001778178 |
| ENSG00000144554.6  | FANCD2        | 202.2752755 | 0.375412102 | 0.101583408 | 3.695604514 | 0.000219364 | 0.0017782   |
| ENSG00000239264.4  | TXNDC5        | 203.9137064 | 0.548254539 | 0.148375337 | 3.695051695 | 0.000219842 | 0.001780914 |
| ENSG00000181381.9  | DDX60L        | 727.4078903 | 0.447526417 | 0.121125684 | 3.694727691 | 0.000220123 | 0.001782026 |
| ENSG00000102837.6  | OLFM4         | 19718.08488 | 1.654523419 | 0.447837183 | 3.694475315 | 0.000220341 | 0.001783217 |
| ENSG00000173950.11 | XXYL1         | 65.27621935 | 0.344062248 | 0.093161134 | 3.693195157 | 0.000221454 | 0.001790476 |
| ENSG0000006788.8   | MYH13         | 3.573324116 | 1.330584131 | 0.360295185 | 3.69303889  | 0.00022159  | 0.001790995 |
| ENSG00000139370.6  | SLC15A4       | 169.6619944 | 0.330720784 | 0.089588296 | 3.691562377 | 0.000222881 | 0.001799394 |
| ENSG00000198892.6  | SHISA4        | 9.346493361 | 0.625143696 | 0.169383046 | 3.690709967 | 0.000223629 | 0.001803376 |
| ENSG00000108883.8  | EFTUD2        | 545.5252047 | 0.210403452 | 0.057046284 | 3.688293714 | 0.000225763 | 0.00181764  |
| ENSG00000160326.9  | SLC2A6        | 45.26527762 | 1.008832617 | 0.273535811 | 3.68811898  | 0.000225918 | 0.00181813  |
| ENSG00000173275.8  | ZNF449        | 75.18706207 | 0.290682954 | 0.078850016 | 3.686530041 | 0.000227333 | 0.001827323 |
| ENSG00000131037.10 | EPS8L1        | 110.062928  | 0.870993898 | 0.236272099 | 3.686401834 | 0.000227447 | 0.001827653 |
| ENSG00000140749.7  | IGSF6         | 123.6261959 | 0.707616588 | 0.191967008 | 3.686136472 | 0.000227684 | 0.001828968 |
| ENSG00000196968.6  | FUT11         | 132.8795401 | 0.37817481  | 0.102634261 | 3.684683917 | 0.000228987 | 0.001838244 |
| ENSG00000101084.12 | C20orf24      | 190.9060131 | 0.449226416 | 0.121941673 | 3.683945007 | 0.000229652 | 0.001842395 |
| ENSG00000103064.9  | SLC7A6        | 320.6715455 | 0.384631969 | 0.104460491 | 3.682080791 | 0.000231338 | 0.001854131 |
| ENSG00000136026.9  | CKAP4         | 606.1504361 | 0.488845878 | 0.132761953 | 3.682123284 | 0.0002313   | 0.001854131 |
| ENSG00000162511.7  | LAPTM5        | 1062.065047 | 0.652433463 | 0.177225195 | 3.681380986 | 0.000231974 | 0.00185863  |
| ENSG0000042493.11  | CAPG          | 369.379087  | 0.503744151 | 0.136848674 | 3.681030562 | 0.000232293 | 0.001860588 |
| ENSG00000153714.5  | LURAP1L       | 110.8867477 | 0.374485146 | 0.101754961 | 3.680264248 | 0.000232992 | 0.001865588 |
| ENSG000000031081.6 | ARHGAP31      | 372.9290304 | 0.368155025 | 0.100062054 | 3.679267117 | 0.000233905 | 0.001871091 |
| ENSG00000134001.8  | EIF2S1        | 567.5235322 | 0.28499099  | 0.077468511 | 3.678797852 | 0.000234336 | 0.001873935 |
| ENSG000000003137.4 | CYP26B1       | 31.49820901 | 0.974968374 | 0.265134067 | 3.677265558 | 0.000235748 | 0.001882804 |
| ENSG00000159147.13 | DONSON        | 78.9583415  | 0.345480529 | 0.094055563 | 3.673153593 | 0.000239575 | 0.001910311 |
| ENSG00000091622.11 | PITPNM3       | 130.3844448 | 0.495737316 | 0.134969707 | 3.672952455 | 0.000239764 | 0.001911203 |
| ENSG00000203697.7  | CAPN8         | 191.6622118 | 0.777873942 | 0.211793373 | 3.672796416 | 0.000239911 | 0.001911626 |
| ENSG00000112699.6  | GMD5          | 552.2447164 | 0.565346592 | 0.153952616 | 3.672211675 | 0.00024046  | 0.001914302 |
| ENSG00000162078.7  | ZG16B         | 118.478392  | 0.768572172 | 0.209290917 | 3.672267202 | 0.000240408 | 0.001914302 |
| ENSG00000105131.3  | EPHX3         | 1.537626255 | 1.881442419 | 0.512429967 | 3.671608882 | 0.000241028 | 0.00191821  |
| ENSG00000224083.1  | RP11-39K24.4  | 10.10440219 | 0.754927549 | 0.20565418  | 3.670859259 | 0.000241736 | 0.001922081 |
| ENSG00000007933.8  | FMO3          | 10.20349804 | 1.535226851 | 0.418666251 | 3.666946758 | 0.000245464 | 0.001947905 |
| ENSG00000116489.8  | CAPZA1        | 1783.827125 | 0.344671791 | 0.094003189 | 3.666596793 | 0.0002458   | 0.00194995  |
| ENSG00000115415.14 | STAT1         | 2357.811908 | 0.92222744  | 0.251613329 | 3.665256695 | 0.000247091 | 0.001957071 |
| ENSG00000163485.11 | ADORA1        | 8.136205065 | 0.76006528  | 0.192616723 | 3.665343889 | 0.000247006 | 0.001957071 |
| ENSG00000168872.11 | DDX19A        | 198.9175717 | 0.21550225  | 0.058793183 | 3.665429189 | 0.000246924 | 0.001957071 |
| ENSG00000136167.9  |               |             |             |             |             |             |             |



## upreg\_DEGs

|                    |               |             |             |             |             |             |             |
|--------------------|---------------|-------------|-------------|-------------|-------------|-------------|-------------|
| ENSG00000200314.1  | Y_RNA         | 5.039909507 | 0.758162611 | 0.207433148 | 3.654973275 | 0.000257209 | 0.002021135 |
| ENSG00000116106.7  | EPHA4         | 155.3181799 | 0.383009192 | 0.104805558 | 3.654474044 | 0.000257771 | 0.002024171 |
| ENSG00000224287.2  | MSL3P1        | 33.88554225 | 0.365676762 | 0.10006407  | 3.654426216 | 0.000257758 | 0.002024171 |
| ENSG00000127423.6  | AUNIP         | 13.4007052  | 0.77459448  | 0.211995964 | 3.653817098 | 0.00025837  | 0.002027702 |
| ENSG00000136950.9  | ARPC5L        | 166.3794299 | 0.325624289 | 0.089147614 | 3.652641659 | 0.000259556 | 0.002035085 |
| ENSG00000232894.1  | MRPS31P2      | 1.352376361 | 2.129253723 | 0.583137818 | 3.651373067 | 0.000260842 | 0.002043878 |
| ENSG00000008086.6  | CDKL5         | 45.09150824 | 0.366472896 | 0.100407747 | 3.649846812 | 0.000262397 | 0.002053869 |
| ENSG00000124772.7  | CPNE5         | 76.8023139  | 0.88673279  | 0.242987994 | 3.649286431 | 0.00026297  | 0.002057313 |
| ENSG00000155755.14 | TMEM237       | 52.4210186  | 0.430614725 | 0.118012262 | 3.648898168 | 0.000263368 | 0.002059777 |
| ENSG00000211652.2  | IGLV7-43      | 37.28096445 | 1.278346816 | 0.350434285 | 3.647893121 | 0.0002644   | 0.00206655  |
| ENSG00000074590.9  | NUAK1         | 77.3112751  | 0.4881281   | 0.133818434 | 3.647689518 | 0.000264609 | 0.002067064 |
| ENSG00000269952.1  | RP11-324I22.3 | 1.21711421  | 1.804043115 | 0.494882989 | 3.645393266 | 0.000266983 | 0.002082168 |
| ENSG00000164604.8  | GPR85         | 6.273003067 | 0.98090482  | 0.269090325 | 3.645262317 | 0.000267119 | 0.002082576 |
| ENSG00000175899.10 | A2M           | 5159.862621 | 0.469681668 | 0.128915585 | 3.643327274 | 0.000269136 | 0.002097645 |
| ENSG00000169122.7  | FAM110B       | 16.19979316 | 0.60023908  | 0.164772082 | 3.64284455  | 0.000269642 | 0.002100927 |
| ENSG00000143603.14 | KCNN3         | 97.56960305 | 0.699402318 | 0.192262905 | 3.637739261 | 0.000275042 | 0.00214099  |
| ENSG00000236480.1  | PKMP1         | 6.243267316 | 0.810472763 | 0.222820138 | 3.637340724 | 0.000275467 | 0.002143634 |
| ENSG00000140575.8  | IQGAP1        | 4911.791183 | 0.235597059 | 0.064796011 | 3.635980899 | 0.000276925 | 0.002154302 |
| ENSG00000156140.4  | ADAMTS3       | 10.94458788 | 0.719666201 | 0.19799829  | 3.634709175 | 0.000278294 | 0.002162254 |
| ENSG00000106992.13 | AK1           | 55.23553871 | 0.801099969 | 0.220477716 | 3.633473642 | 0.000279631 | 0.002171283 |
| ENSG00000182534.9  | MXRA7         | 171.624409  | 0.484754796 | 0.133442466 | 3.632687632 | 0.000280485 | 0.002176553 |
| ENSG00000223960.2  | AC009948.5    | 38.68960313 | 0.500834486 | 0.137974305 | 3.629911269 | 0.000283519 | 0.002196674 |
| ENSG00000202354.1  | RNY3          | 6.246216249 | 0.909797866 | 0.250732737 | 3.628556359 | 0.000285011 | 0.002207546 |
| ENSG00000139625.8  | MAP3K12       | 61.19758331 | 0.568017467 | 0.156546227 | 3.628432803 | 0.000285147 | 0.002207915 |
| ENSG00000196584.2  | XRCC2         | 52.82658987 | 0.449080143 | 0.123799901 | 3.627467719 | 0.000286215 | 0.002214804 |
| ENSG00000122877.9  | EGR2          | 41.41400667 | 1.287794543 | 0.355025225 | 3.627332512 | 0.000286364 | 0.002215275 |
| ENSG00000070404.5  | FSTL3         | 49.11924054 | 0.831998833 | 0.229412534 | 3.626649418 | 0.000287123 | 0.002219762 |
| ENSG00000117899.6  | MESDC2        | 461.988435  | 0.191558318 | 0.052842733 | 3.62506454  | 0.000288889 | 0.00223134  |
| ENSG00000270933.1  | CTD-222E11.1  | 14.94645562 | 0.615141543 | 0.169717723 | 3.624497981 | 0.000289523 | 0.002234636 |
| ENSG00000271811.1  | RP1-79C4.4    | 2.023434008 | 1.623969105 | 0.448060367 | 3.62444265  | 0.000290585 | 0.002234636 |
| ENSG00000154328.11 | NEIL2         | 44.95195541 | 0.396517531 | 0.109455913 | 3.622623221 | 0.000291631 | 0.002247631 |
| ENSG00000130513.6  | GDF15         | 70.28861793 | 1.006663808 | 0.277970488 | 3.62147728  | 0.000292926 | 0.002256914 |
| ENSG00000179593.11 | ALOX15B       | 9.317978074 | 1.320832811 | 0.364900401 | 3.619707756 | 0.000294936 | 0.002270295 |
| ENSG00000158050.4  | DUSP2         | 38.87918307 | 1.208001364 | 0.333940255 | 3.617417623 | 0.000297557 | 0.002288348 |
| ENSG00000257221.1  | RP11-689B22.2 | 3.300545758 | 1.31583882  | 0.363772567 | 3.617201898 | 0.000297805 | 0.002289548 |
| ENSG00000227115.2  | RP11-267C16.1 | 0.64096527  | 3.988103568 | 1.102658923 | 3.616806146 | 0.000298261 | 0.002292342 |
| ENSG00000140853.11 | NLRC5         | 726.2135724 | 0.687752415 | 0.19018349  | 3.616257198 | 0.000298893 | 0.002296498 |
| ENSG00000256540.1  | RP11-598F7.6  | 0.75076933  | 2.069002069 | 0.57222114  | 3.615738607 | 0.000299493 | 0.002298972 |
| ENSG00000115598.5  | IL1RL2        | 6.397386837 | 0.776987394 | 0.214934439 | 3.614997199 | 0.000300351 | 0.002304347 |
| ENSG00000131355.10 | EMR3          | 29.90069053 | 1.077494968 | 0.298290721 | 3.612230924 | 0.000303574 | 0.002324718 |
| ENSG00000162512.11 | SDC3          | 354.5808438 | 0.549557573 | 0.1521387   | 3.612214208 | 0.000303594 | 0.002324718 |
| ENSG00000090863.7  | GLG1          | 1381.401371 | 0.182054022 | 0.050406981 | 3.611682676 | 0.000304217 | 0.002328773 |
| ENSG00000211964.2  | IGHV3-48      | 178.0709209 | 1.194739411 | 0.330855725 | 3.611058602 | 0.00030495  | 0.002333667 |
| ENSG00000161714.7  | PLCD3         | 444.9785028 | 0.556771918 | 0.15419435  | 3.610845123 | 0.000305201 | 0.002334871 |
| ENSG00000132958.13 | TPTE2         | 2.058665955 | 1.525879206 | 0.422615225 | 3.61056374  | 0.000305532 | 0.00233597  |
| ENSG00000110911.10 | SLC11A2       | 476.0293002 | 0.356340134 | 0.098705937 | 3.610118556 | 0.000306057 | 0.002339265 |
| ENSG00000120709.6  | FAM53C        | 235.8140866 | 0.222395232 | 0.061612072 | 3.609604814 | 0.000306664 | 0.002342579 |
| ENSG00000069482.6  | GAL           | 1.822887041 | 2.215698639 | 0.613995108 | 3.608658455 | 0.000307785 | 0.002349582 |
| ENSG00000108654.7  | DDX5          | 4086.960106 | 0.25391003  | 0.070422992 | 3.605499029 | 0.000311554 | 0.002373987 |
| ENSG00000173193.9  | PARP14        | 3372.358138 | 0.541803854 | 0.150295278 | 3.604929324 | 0.000312238 | 0.002378074 |
| ENSG00000143297.14 | FCRL5         | 296.0285982 | 1.295074637 | 0.359394659 | 3.603488824 | 0.000313974 | 0.002389135 |
| ENSG00000160285.10 | LSS           | 332.2835068 | 0.492476747 | 0.136672418 | 3.603336756 | 0.000314158 | 0.002389135 |
| ENSG00000188133.5  | TMEM215       | 1.978834813 | 1.565755032 | 0.434529125 | 3.603337368 | 0.000314157 | 0.002389135 |
| ENSG00000159110.15 | IFNAR2        | 197.4763469 | 0.446761248 | 0.124023812 | 3.602221538 | 0.000315509 | 0.002396728 |
| ENSG00000261997.1  | RP11-212I21.4 | 17.28500475 | 0.603340353 | 0.167510671 | 3.601802503 | 0.000316018 | 0.002399929 |
| ENSG00000110944.4  | IL23A         | 5.042250412 | 1.589385609 | 0.441334453 | 3.601317776 | 0.000316608 | 0.002403674 |
| ENSG00000090520.6  | DNAJB11       | 654.471062  | 0.366445285 | 0.101765323 | 3.600885584 | 0.000317135 | 0.00240694  |
| ENSG00000168610.10 | STAT3         | 2479.967345 | 0.37701538  | 0.104734499 | 3.599724855 | 0.000318554 | 0.002416972 |
| ENSG00000134375.6  | TIMM17A       | 349.4449038 | 0.320462585 | 0.08902982  | 3.599497182 | 0.000318833 | 0.002418352 |
| ENSG00000213190.2  | MLLT11        | 8.268699537 | 0.77982055  | 0.216669092 | 3.599131486 | 0.000319282 | 0.002421017 |
| ENSG00000240382.1  | IGKV1-17      | 85.68532726 | 1.499690268 | 0.416838784 | 3.597770472 | 0.000320957 | 0.002431496 |
| ENSG00000111231.4  | GNP3          | 65.53460248 | 0.29543155  | 0.08214971  | 3.596257995 | 0.000322828 | 0.002442696 |
| ENSG00000197977.3  | ELOVL2        | 4.775294831 | 1.274224175 | 0.354335126 | 3.596098955 | 0.000323025 | 0.002443447 |
| ENSG00000164332.6  | UBLCP1        | 251.5061537 | 0.332724998 | 0.092536766 | 3.595597868 | 0.000323647 | 0.002447412 |
| ENSG00000065600.8  | TMEM206       | 46.95821776 | 0.49244681  | 0.137092263 | 3.592083155 | 0.000328045 | 0.002476115 |
| ENSG00000196369.6  | SRGAP2B       | 29.86216969 | 0.463116901 | 0.128929797 | 3.592008312 | 0.000328139 | 0.002476115 |
| ENSG00000105556.6  | MIER2         | 61.2113958  | 0.428199582 | 0.119214847 | 3.591830997 | 0.000328363 | 0.002476299 |
| ENSG00000106852.11 | LHX6          | 15.99604874 | 0.796377626 | 0.221783209 | 3.590793147 | 0.000329673 | 0.002484676 |
| ENSG00000092607.9  | TBX15         | 1.534480409 | 2.014955981 | 0.561185679 | 3.5905335   | 0.000330002 | 0.002485648 |
| ENSG00000249437.3  | NAIP          | 55.25727816 | 0.574395933 | 0.159975043 | 3.590534663 | 0.000330033 | 0.002485648 |
| ENSG00000078900.10 | TP73          | 5.637885015 | 1.002105241 | 0.279166507 | 3.589632769 | 0.000331144 | 0.002493497 |
| ENSG00000111252.6  | SH2B3         | 405.117232  | 0.420429433 | 0.11714404  | 3.588995509 | 0.000331955 | 0.002497334 |
| ENSG00000234130.2  | RP13-88F20.1  | 14.09808025 | 0.529480519 | 0.147576758 | 3.587831362 | 0.00033344  | 0.002506992 |
| ENSG00000104447.7  | TRPS1         | 230.1070906 | 0.571843988 | 0.159411558 | 3.587217867 | 0.000334225 | 0.002512137 |
| ENSG00000142347.12 | MYO1F         | 259.179932  | 0.640992189 | 0.17882536  | 3.584459103 | 0.000337778 | 0.002534247 |
| ENSG00000254166.1  | RP11-255B23.4 | 0.632074578 | 2.448059287 | 0.682981761 | 3.584369931 | 0.000337893 | 0.002534349 |
| ENSG00000225968.4  | ELFN1         | 3.726231936 | 0.965887343 | 0.269593048 | 3.582760577 | 0.000339982 | 0.002547717 |
| ENSG00000127124.9  | HIVEP3        | 87.03033391 | 0.56230006  | 0.156966132 | 3.582301831 | 0.00034058  | 0.002551429 |
| ENSG00000166750.5  | SLFN5         | 738.9357997 | 0.591690769 | 0.165221855 | 3.581189476 | 0.000342034 | 0.002560776 |
| ENSG00000111229.11 | ARPC3         | 733.1936306 | 0.279205334 | 0.07797934  | 3.580503949 | 0.000342932 | 0.002566733 |
| ENSG00000087586.13 | AURKA         | 159.5378884 | 0.499751346 | 0.139579617 | 3.580403468 | 0.000343064 | 0.002566948 |
| ENSG00000235531.5  | RP11-383H13.1 | 23.32627049 | 0.589678617 | 0.16473495  | 3.57955988  | 0.000344173 | 0.002574475 |
| ENSG00000223609.3  | HBD           | 0.942681608 | 2.19859765  | 0.614485812 | 3.577946974 | 0.000346304 | 0.002588077 |
| ENSG00000168807.12 | SNTB2         | 678.2281136 | 0.228348391 | 0.063826272 | 3.57765517  | 0.00034669  | 0.002590189 |
| ENSG00000166845.9  | C18orf54      | 46.72972499 | 0.438738968 | 0.122719026 | 3.575150333 | 0.000350027 | 0.002611666 |
| ENSG00000211669.2  | IGLV3-10      | 54.6625164  | 1.52566172  | 0.426746185 | 3.575103359 | 0.00035009  | 0.002611666 |
| ENSG00000146233.3  | CYP39A1       | 33.54197142 | 0.587239087 | 0.164273756 | 3.574758992 | 0.000350551 | 0.002614322 |
| ENSG00000109046.10 | WSB1          | 1062.423557 | 0.274930715 | 0.076912727 | 3.574580261 | 0.00035079  | 0.002615325 |
| ENSG00000135842.12 | FAM129A       | 371.8465219 | 0.67190463  | 0.187991577 | 3.574120936 | 0.000351407 | 0.002617568 |
| ENSG00000225205.1  | AC093818.1    | 16.32395467 | 0.733080924 | 0.205125085 | 3.573823864 | 0.000351806 | 0.002618974 |
| ENSG00000153012.7  | LG12          | 26.83098169 | 1.279985552 | 0.358170463 | 3.573677017 | 0.000352003 | 0.002619661 |
| ENSG00000121005.4  | CRISPLD1      | 9.289977162 | 1.027090538 | 0.287505841 | 3.572416245 | 0.000353703 | 0.002631522 |
| ENSG00000108688.7  | CCL7          | 2.593427821 | 1.775183929 | 0.496959482 | 3.572089865 | 0.000354144 | 0.002634018 |
| ENSG00000106415.8  | GLCC1         | 197.532904  | 0.577036509 | 0.161553786 | 3.571791934 | 0.000354547 | 0.002636137 |
| ENSG00000240024.1  | LINC00888     | 22.5179008  | 0.467322968 | 0.130839651 | 3.571722837 |             |             |

## upreg\_DEGs

|                    |                |             |             |             |             |             |             |
|--------------------|----------------|-------------|-------------|-------------|-------------|-------------|-------------|
| ENSG00000189369.7  | GSPT2          | 71.6761995  | 0.420982818 | 0.118271225 | 3.559469495 | 0.000371605 | 0.002736902 |
| ENSG00000232450.1  | RP4-730K3.3    | 2.20791494  | 1.161097489 | 0.326245979 | 3.558963368 | 0.000372322 | 0.00274137  |
| ENSG00000243398.2  | RN7SL141P      | 1.267610161 | 1.495278891 | 0.420183848 | 3.558630102 | 0.000372794 | 0.002744038 |
| ENSG00000245648.1  | RP11-277P12.20 | 5.380476281 | 0.939570676 | 0.264129687 | 3.557232389 | 0.000374783 | 0.00275623  |
| ENSG00000155966.9  | AFF2           | 26.01615767 | 1.331501346 | 0.37433884  | 3.556941477 | 0.000375198 | 0.002758468 |
| ENSG00000119917.9  | IFIT3          | 436.3165752 | 0.995936147 | 0.280025136 | 3.556595529 | 0.000375692 | 0.002761286 |
| ENSG00000251442.1  | RP11-792D21.2  | 9.163415212 | 0.71774138  | 0.201848624 | 3.555839847 | 0.000376774 | 0.002768418 |
| ENSG00000120279.6  | MYCT1          | 59.10322569 | 0.47226533  | 0.132836799 | 3.555229674 | 0.000377649 | 0.002772362 |
| ENSG00000171223.4  | JUNB           | 821.6337495 | 0.770240997 | 0.216660367 | 3.55506181  | 0.00037789  | 0.002772532 |
| ENSG00000146457.10 | WTAP           | 645.6374902 | 0.220619982 | 0.062085358 | 3.553494563 | 0.000380149 | 0.002787461 |
| ENSG00000157693.10 | C9orf91        | 121.8984358 | 0.387406968 | 0.109028156 | 3.553274519 | 0.000380467 | 0.002788152 |
| ENSG00000100078.3  | PLA2G3         | 5.396095234 | 2.654203317 | 0.74701093  | 3.553098369 | 0.000380722 | 0.002789198 |
| ENSG00000112655.11 | PTK7           | 184.8901506 | 0.445533865 | 0.125436973 | 3.551854411 | 0.000382527 | 0.002800769 |
| ENSG00000109321.6  | AREG           | 1.57535046  | 1.536920233 | 0.432773882 | 3.551323909 | 0.000383298 | 0.002804771 |
| ENSG00000121211.3  | MND1           | 16.74487283 | 0.460826425 | 0.129792709 | 3.550480062 | 0.000384529 | 0.002812951 |
| ENSG00000144655.10 | CSRNP1         | 215.2529085 | 0.607625381 | 0.171156024 | 3.550125601 | 0.000385047 | 0.002815914 |
| ENSG00000118418.10 | HMG3           | 208.5274328 | 0.284976154 | 0.080285283 | 3.549544099 | 0.000385899 | 0.002820483 |
| ENSG00000144401.10 | METTL21A       | 96.95202198 | 0.344335489 | 0.097030737 | 3.548725883 | 0.0003871   | 0.002828431 |
| ENSG00000065923.5  | SLC9A7         | 61.38484509 | 0.756792207 | 0.213365081 | 3.546935627 | 0.00038974  | 0.002842714 |
| ENSG00000254612.2  | RP11-676M6.1   | 125.2613985 | 0.242323087 | 0.068317087 | 3.547034852 | 0.000389593 | 0.002842714 |
| ENSG00000187079.10 | TEAD1          | 637.3761332 | 0.27116748  | 0.076473046 | 3.545922317 | 0.000391242 | 0.002851161 |
| ENSG00000198700.5  | IPO9           | 434.1260038 | 0.177313468 | 0.050023155 | 3.54462781  | 0.000393168 | 0.002862685 |
| ENSG00000212588.1  | SNORA26        | 14.58853612 | 0.799237793 | 0.225524223 | 3.543911077 | 0.000394238 | 0.00286688  |
| ENSG00000157617.12 | C2CD2          | 235.6933104 | 0.284433693 | 0.080269157 | 3.54349919  | 0.000394855 | 0.002872446 |
| ENSG00000086189.5  | DIMT1          | 103.0051455 | 0.313737257 | 0.088543461 | 3.543313696 | 0.000395132 | 0.002873203 |
| ENSG00000135899.12 | SP110          | 305.9479483 | 0.519226116 | 0.146600168 | 3.541783922 | 0.000397431 | 0.00288697  |
| ENSG00000254098.1  | IGKV2-26       | 0.887766385 | 2.111647969 | 0.596502782 | 3.540047143 | 0.000400056 | 0.002903494 |
| ENSG00000010539.7  | ZNF200         | 114.1315473 | 0.256848042 | 0.072568932 | 3.539366446 | 0.000401089 | 0.002909295 |
| ENSG00000076685.14 | NT5C2          | 657.2857641 | 0.287293224 | 0.081177613 | 3.539069606 | 0.00040154  | 0.002910872 |
| ENSG00000175054.10 | ATR            | 587.2936012 | 0.271252012 | 0.076673035 | 3.537775861 | 0.000403512 | 0.002924232 |
| ENSG00000102316.12 | MAGED2         | 504.9003743 | 0.230322893 | 0.065124953 | 3.536630487 | 0.000405266 | 0.002935321 |
| ENSG00000265078.1  | RN7SL664P      | 1.274796489 | 1.473814086 | 0.416793037 | 3.536081356 | 0.00040611  | 0.002940574 |
| ENSG00000151746.9  | BICD1          | 76.01387608 | 0.58229268  | 0.164712216 | 3.535212479 | 0.000407447 | 0.002948545 |
| ENSG00000177337.3  | DLGAP1-AS1     | 40.07454847 | 0.476954134 | 0.134936116 | 3.534666237 | 0.000408291 | 0.002953788 |
| ENSG00000163599.10 | CTLA4          | 25.96702722 | 1.271165657 | 0.359807988 | 3.532900048 | 0.000411028 | 0.002971001 |
| ENSG00000108622.6  | ICAM2          | 105.6825113 | 0.592958992 | 0.167853176 | 3.532605134 | 0.000411487 | 0.002973453 |
| ENSG00000161647.14 | MPP3           | 12.3893672  | 0.667484918 | 0.189013496 | 3.531414065 | 0.000413344 | 0.002984278 |
| ENSG00000225101.3  | OR52K3P        | 0.925472052 | 2.55682692  | 0.724134838 | 3.530871305 | 0.000414193 | 0.002989541 |
| ENSG00000096996.11 | IL12RB1        | 72.61744441 | 0.647584427 | 0.183462324 | 3.529795173 | 0.000415882 | 0.002996514 |
| ENSG00000136997.10 | MYC            | 254.6861142 | 0.454112307 | 0.128676162 | 3.529109822 | 0.00041696  | 0.003002547 |
| ENSG00000039560.9  | RAI14          | 251.4328782 | 0.437380648 | 0.123942381 | 3.528903058 | 0.000417286 | 0.003004025 |
| ENSG00000131788.11 | PIAS3          | 97.46188482 | 0.253561353 | 0.071859201 | 3.52858577  | 0.000417787 | 0.003006759 |
| ENSG00000104267.5  | CA2            | 3550.915371 | 0.831273006 | 0.235588527 | 3.528495282 | 0.000417929 | 0.003006918 |
| ENSG00000162139.5  | NEU3           | 86.1816039  | 0.303390382 | 0.085992005 | 3.528123144 | 0.000418517 | 0.003010278 |
| ENSG0000010818.4   | HIVEP2         | 576.6649884 | 0.350511777 | 0.099407528 | 3.526008387 | 0.000421874 | 0.003029167 |
| ENSG00000170458.9  | CD14           | 296.3047718 | 0.553398821 | 0.156971215 | 3.525479625 | 0.000422717 | 0.00303179  |
| ENSG00000188404.4  | SELL           | 216.9008272 | 1.41497961  | 0.40135871  | 3.525473781 | 0.000422726 | 0.003033179 |
| ENSG00000198844.6  | ARHGEF15       | 28.09039108 | 0.581207613 | 0.164854307 | 3.525583434 | 0.000422551 | 0.00303179  |
| ENSG00000109956.8  | B3GAT1         | 4.323289934 | 1.166289042 | 0.330863674 | 3.524980631 | 0.000423514 | 0.00303569  |
| ENSG00000072694.14 | FCGR2B         | 50.72088369 | 1.038591902 | 0.294662737 | 3.524680162 | 0.000423994 | 0.003038063 |
| ENSG00000164520.7  | RAET1E         | 2.654386165 | 1.378050937 | 0.390978461 | 3.524621107 | 0.000424089 | 0.003038063 |
| ENSG00000128590.4  | DNAJB9         | 453.6923694 | 0.437260527 | 0.124081718 | 3.523972233 | 0.000425129 | 0.003043761 |
| ENSG00000234883.2  | MIR155HG       | 33.551062   | 0.927592168 | 0.263416415 | 3.521390901 | 0.000429289 | 0.003065613 |
| ENSG00000084110.6  | HAL            | 8.721967002 | 0.954528352 | 0.271080163 | 3.521203249 | 0.000429593 | 0.003066904 |
| ENSG00000010295.15 | IFFO1          | 69.19683966 | 0.526439091 | 0.149541788 | 3.520347708 | 0.000430981 | 0.003075051 |
| ENSG00000179218.9  | CALR           | 6174.084982 | 0.445209158 | 0.12647102  | 3.520246443 | 0.000431146 | 0.003075343 |
| ENSG00000204472.8  | AIF1           | 186.7816202 | 0.494954426 | 0.140613508 | 3.51996357  | 0.000431606 | 0.003077743 |
| ENSG00000135763.5  | URB2           | 151.6102049 | 0.345885665 | 0.098278084 | 3.519458782 | 0.000432428 | 0.003082723 |
| ENSG00000173898.7  | SPTBN2         | 59.15391696 | 0.76845885  | 0.218451322 | 3.517757838 | 0.000435209 | 0.003098999 |
| ENSG00000253234.1  | IGLV2-5        | 1.374553522 | 2.052248566 | 0.583413394 | 3.517657611 | 0.000435374 | 0.003099283 |
| ENSG00000105246.5  | EBI3           | 19.9256238  | 0.825149162 | 0.234605296 | 3.51718045  | 0.000436157 | 0.003103973 |
| ENSG00000170445.8  | HARS           | 320.4478783 | 0.250757947 | 0.071310727 | 3.516412729 | 0.00043742  | 0.003112073 |
| ENSG00000109805.5  | NCAPG          | 168.8038766 | 0.529723613 | 0.150690972 | 3.515297617 | 0.000439261 | 0.003124278 |
| ENSG00000131620.13 | ANO1           | 87.8229312  | 0.739694874 | 0.210439107 | 3.515006721 | 0.000439743 | 0.003126809 |
| ENSG00000114850.2  | SSR3           | 1723.639056 | 0.365931455 | 0.104146599 | 3.513618864 | 0.000442047 | 0.003137056 |
| ENSG00000211598.2  | IGKV4-1        | 1230.951574 | 1.026282997 | 0.292088146 | 3.513607143 | 0.000442066 | 0.003137056 |
| ENSG00000133740.6  | E2F5           | 94.5434054  | 0.678289456 | 0.193181047 | 3.511159439 | 0.000446157 | 0.00316338  |
| ENSG00000180340.5  | FZD2           | 11.3745301  | 0.63787643  | 0.181944198 | 3.505890468 | 0.000455083 | 0.003218416 |
| ENSG00000100968.9  | NFATC4         | 87.88153427 | 0.526991753 | 0.150348143 | 3.50514309  | 0.000456362 | 0.003224716 |
| ENSG00000260916.1  | CCEP1          | 235.0155215 | 0.283908495 | 0.081012506 | 3.50450206  | 0.000457462 | 0.003230655 |
| ENSG00000156110.9  | ADK            | 106.9148121 | 0.293390565 | 0.083726356 | 3.504160185 | 0.000458505 | 0.003233888 |
| ENSG00000123094.11 | RASSF8         | 93.21712682 | 0.5860261   | 0.167251651 | 3.503858393 | 0.000458569 | 0.00323572  |
| ENSG00000236739.3  | RP11-370B11.1  | 15.38387245 | 0.495879917 | 0.141568994 | 3.502743797 | 0.000460492 | 0.003247448 |
| ENSG00000110427.10 | KIAA1549L      | 3.895263845 | 1.425640142 | 0.407036786 | 3.502484762 | 0.00046094  | 0.003249687 |
| ENSG00000181631.6  | P2RY13         | 123.9865574 | 0.615822818 | 0.175892341 | 3.501134925 | 0.000463281 | 0.003265267 |
| ENSG00000143942.4  | CHAC2          | 44.5390191  | 0.476383916 | 0.13607438  | 3.500908216 | 0.000463676 | 0.003266385 |
| ENSG00000153551.9  | CMTM7          | 65.85963819 | 0.665796533 | 0.190183165 | 3.500817405 | 0.000463834 | 0.003266385 |
| ENSG00000223648.2  | IGHV3-64       | 12.45493462 | 1.50891278  | 0.431016557 | 3.500823241 | 0.000463828 | 0.003266385 |
| ENSG0000011837.7   | MAK            | 1.260586804 | 2.093325885 | 0.598053533 | 3.500231615 | 0.000464854 | 0.003270796 |
| ENSG00000171711.2  | DEFB4A         | 1.209721967 | 5.762186179 | 1.646523923 | 3.499606717 | 0.000465945 | 0.003277546 |
| ENSG00000102898.7  | NUTF2          | 236.6837265 | 0.284624113 | 0.081360665 | 3.498301215 | 0.000468232 | 0.003291773 |
| ENSG00000105501.7  | SIGLEC5        | 4.161567164 | 1.306697421 | 0.373656985 | 3.497050704 | 0.000470432 | 0.003304443 |
| ENSG00000143753.8  | DEGS1          | 308.8020758 | 0.273215795 | 0.078126613 | 3.497089992 | 0.000470363 | 0.003304443 |
| ENSG00000162692.6  | VCAM1          | 589.9140913 | 0.666286836 | 0.190551502 | 3.496623381 | 0.000471187 | 0.003308806 |
| ENSG00000070501.7  | POLB           | 88.98728668 | 0.252255052 | 0.072172328 | 3.495176871 | 0.000473748 | 0.00332117  |
| ENSG00000224126.2  | UBE2SP2        | 6.719532842 | 0.766867679 | 0.219444817 | 3.494580954 | 0.000474807 | 0.00332672  |
| ENSG00000053372.4  | MRTO4          | 144.376002  | 0.334682256 | 0.095851853 | 3.491661827 | 0.000480026 | 0.003355731 |
| ENSG00000197498.8  | RPF2           | 155.2944022 | 0.331921332 | 0.095093262 | 3.490482137 | 0.00048215  | 0.003369635 |
| ENSG00000100364.14 | KIAA0930       | 394.1250558 | 0.30852334  | 0.088401745 | 3.49001413  | 0.000482995 | 0.003371979 |
| ENSG00000172819.12 | RARG           | 73.27976933 | 0.508586076 | 0.145729949 | 3.489921444 | 0.000483163 | 0.003371979 |
| ENSG00000174799.6  | CEP135         | 154.2841767 | 0.363458804 | 0.104141697 | 3.490041109 | 0.000482946 | 0.003371979 |
| ENSG0000007306.10  | CEACAM7        | 9512.422113 | 1.035133659 | 0.296826321 | 3.487337831 | 0.000487855 | 0.003401323 |
| ENSG00000240929.2  | HIST2H2BB      | 1.955437704 | 1.744478827 | 0.500419666 | 3.486031714 | 0.000490243 | 0.003415647 |
| ENSG00000139515.5  | PDX1           | 2.149373724 | 1.96069093  | 0.562455414 | 3.485949078 | 0.000490394 | 0.003415746 |
| ENSG00000184922.9  | FMNL1          | 158.6006393 | 0.767131463 | 0.220091842 | 3.485506116 | 0.000491207 | 0.00342045  |
| ENSG00000169174.9  |                |             |             |             |             |             |             |

upreg\_DEGs

|                    |               |             |             |             |             |             |             |
|--------------------|---------------|-------------|-------------|-------------|-------------|-------------|-------------|
| ENSG00000132256.14 | TRIM5         | 296.9707048 | 0.283861239 | 0.081841506 | 3.468426408 | 0.000523516 | 0.003603819 |
| ENSG00000117399.9  | CDC20         | 105.0582296 | 0.565740141 | 0.163121202 | 3.468219549 | 0.000523919 | 0.003604876 |
| ENSG00000159131.12 | GART          | 541.7367363 | 0.276849334 | 0.079843341 | 3.467406663 | 0.000525506 | 0.003613799 |
| ENSG00000147119.3  | CHST7         | 16.16710107 | 0.588070513 | 0.169628613 | 3.466812012 | 0.00052667  | 0.003619803 |
| ENSG00000164318.13 | EGFLAM        | 27.19021109 | 0.580661734 | 0.167561927 | 3.465356024 | 0.00052953  | 0.00363745  |
| ENSG00000184602.5  | SNN           | 130.2537909 | 0.595893945 | 0.172027012 | 3.463955675 | 0.000532294 | 0.00365543  |
| ENSG0000004897.7   | CDC27         | 624.2539637 | 0.276020725 | 0.079719754 | 3.46238808  | 0.000535405 | 0.003674762 |
| ENSG00000158517.9  | NCF1          | 55.67425374 | 0.847702706 | 0.244865585 | 3.461910365 | 0.000536356 | 0.003680276 |
| ENSG00000183520.7  | UTP11L        | 158.304292  | 0.260781748 | 0.075344929 | 3.461171842 | 0.000537829 | 0.00368937  |
| ENSG00000128641.13 | MYO1B         | 1103.248699 | 0.370417983 | 0.107055314 | 3.460061625 | 0.000540052 | 0.003702575 |
| ENSG00000100906.6  | NFKBIA        | 895.8917065 | 0.438971639 | 0.126881689 | 3.459692594 | 0.000540792 | 0.003704592 |
| ENSG00000172346.10 | CSDC2         | 2.394841766 | 1.377367405 | 0.39820264  | 3.458961012 | 0.000542263 | 0.003712625 |
| ENSG00000198795.6  | ZNF521        | 91.00790546 | 0.512299116 | 0.148133204 | 3.458367902 | 0.000543459 | 0.003719786 |
| ENSG00000103522.11 | IL21R         | 62.70712662 | 1.14839767  | 0.332082156 | 3.458173379 | 0.000543851 | 0.003721016 |
| ENSG00000125089.12 | SH3TC1        | 110.7972013 | 0.632355832 | 0.182893706 | 3.457504619 | 0.000545203 | 0.003728649 |
| ENSG00000240809.1  | RP11-550F7.1  | 84.53927721 | 0.354875005 | 0.102685861 | 3.455928616 | 0.000548401 | 0.003745373 |
| ENSG00000100234.11 | TIMP3         | 681.8023083 | 0.629830172 | 0.182316616 | 3.454595569 | 0.000551119 | 0.003762905 |
| ENSG00000100228.8  | RAB36         | 9.053768003 | 0.534464353 | 0.154746235 | 3.453811686 | 0.000552723 | 0.00377179  |
| ENSG00000105639.14 | JAK3          | 257.5875288 | 0.920337741 | 0.266590892 | 3.452247504 | 0.000555938 | 0.003790608 |
| ENSG00000152377.8  | SPOCK1        | 19.98398748 | 0.910010318 | 0.26361729  | 3.452013028 | 0.000556421 | 0.003792864 |
| ENSG00000103196.7  | CRISPLD2      | 400.0414454 | 0.611334355 | 0.177185067 | 3.450258898 | 0.000560049 | 0.003815507 |
| ENSG00000106799.8  | TGFBR1        | 785.7196196 | 0.258155227 | 0.074827156 | 3.450020562 | 0.000560544 | 0.003817833 |
| ENSG00000128342.4  | LIF           | 92.26379539 | 0.479468172 | 0.138993321 | 3.449577056 | 0.000561466 | 0.003822018 |
| ENSG00000226380.3  | MIR29B1       | 111.6285075 | 0.547764195 | 0.158832665 | 3.448687294 | 0.000563319 | 0.003830444 |
| ENSG00000197043.9  | ANXA6         | 709.1259051 | 0.508986054 | 0.147635379 | 3.447588626 | 0.000565615 | 0.003843957 |
| ENSG00000167100.10 | SAMD14        | 9.467768589 | 0.768691208 | 0.222987817 | 3.447234104 | 0.000566358 | 0.003847322 |
| ENSG00000241644.2  | INMT          | 52.49406486 | 0.642114489 | 0.18627504  | 3.447131125 | 0.000566574 | 0.003847322 |
| ENSG00000136811.12 | ODF2          | 242.6409674 | 0.256009247 | 0.074273164 | 3.446860681 | 0.000567141 | 0.003848026 |
| ENSG00000179934.5  | CCR8          | 2.916876359 | 1.349490565 | 0.391497665 | 3.446995182 | 0.000566859 | 0.003848026 |
| ENSG00000243753.1  | HLA-L         | 16.94887167 | 0.788576734 | 0.228778146 | 3.446905867 | 0.000567046 | 0.003848026 |
| ENSG00000136295.10 | TTYH3         | 301.1854984 | 0.531848795 | 0.154321364 | 3.446371784 | 0.000568168 | 0.003853945 |
| ENSG00000136840.15 | ST6GALNAC4    | 110.7353508 | 0.471708945 | 0.136882725 | 3.446080906 | 0.00056878  | 0.003856676 |
| ENSG00000174442.7  | ZWILCH        | 154.3756247 | 0.389464449 | 0.113038593 | 3.445411322 | 0.000570191 | 0.003863455 |
| ENSG00000137310.7  | TCF19         | 142.9067491 | 0.364253976 | 0.10574148  | 3.444759561 | 0.000571568 | 0.003871239 |
| ENSG00000112078.9  | KCTD20        | 753.9513097 | 0.206412202 | 0.059937464 | 3.443792736 | 0.000573615 | 0.003883486 |
| ENSG00000152128.13 | TMEM163       | 16.1029475  | 1.485695361 | 0.431464179 | 3.44338055  | 0.000574449 | 0.003888353 |
| ENSG00000154582.12 | TCEB1         | 118.837474  | 0.279334084 | 0.081123865 | 3.443303459 | 0.000574654 | 0.003888404 |
| ENSG00000177432.6  | NAP1L5        | 15.64485188 | 0.569124258 | 0.165304928 | 3.442875332 | 0.000575565 | 0.003891392 |
| ENSG00000101144.8  | BMP7          | 39.44242421 | 0.796083961 | 0.231275337 | 3.442148096 | 0.000577114 | 0.003899751 |
| ENSG00000131831.13 | RAI2          | 34.48790236 | 0.456387842 | 0.132591031 | 3.442071766 | 0.000577277 | 0.003899793 |
| ENSG00000180672.4  | AC007362.1    | 20.97574314 | 0.687410117 | 0.199717494 | 3.441912391 | 0.000577617 | 0.003901032 |
| ENSG00000124067.12 | SLC12A4       | 136.0755175 | 0.482190951 | 0.140187247 | 3.43962067  | 0.00058253  | 0.003928026 |
| ENSG00000202695.12 | BTN3A1        | 595.2544496 | 0.450744867 | 0.131069419 | 3.43897814  | 0.000583914 | 0.003936086 |
| ENSG00000110900.10 | TSPAN11       | 148.9566087 | 0.56599654  | 0.164640832 | 3.437765294 | 0.000586536 | 0.003952686 |
| ENSG00000136286.10 | MYO1G         | 149.7450435 | 0.638881685 | 0.185857937 | 3.437473234 | 0.000587169 | 0.00395481  |
| ENSG00000146021.10 | KLHL3         | 69.92147112 | 0.453517909 | 0.131933392 | 3.437476315 | 0.000587162 | 0.00395481  |
| ENSG00000257605.1  | RP11-680A11.5 | 0.595030604 | 2.019313914 | 0.587763294 | 3.43559037  | 0.000591264 | 0.003978592 |
| ENSG00000124783.8  | SSR1          | 1911.077633 | 0.255211272 | 0.074286945 | 3.435479458 | 0.000591506 | 0.003978643 |
| ENSG00000196632.6  | WNK3          | 14.58788058 | 0.622784402 | 0.181295114 | 3.435196832 | 0.000592124 | 0.003981719 |
| ENSG00000164134.8  | NAA15         | 609.5461843 | 0.298766062 | 0.087008448 | 3.433759225 | 0.000595273 | 0.003998575 |
| ENSG00000106477.14 | CEP41         | 72.03977114 | 0.285278382 | 0.083083055 | 3.43365302  | 0.000595506 | 0.003999063 |
| ENSG00000115457.5  | IGFBP2        | 349.9906075 | 0.704115873 | 0.205108323 | 3.432912251 | 0.000597135 | 0.004008923 |
| ENSG00000231047.1  | GCNT1P3       | 0.733773101 | 1.884720861 | 0.549063023 | 3.432612982 | 0.000597795 | 0.004011187 |
| ENSG00000169241.13 | SLC50A1       | 381.7891496 | 0.461632577 | 0.134500081 | 3.432210392 | 0.000598683 | 0.004016064 |
| ENSG00000240065.3  | PSMB9         | 317.0657716 | 0.785529649 | 0.228880176 | 3.432056295 | 0.000599023 | 0.004017264 |
| ENSG00000166839.12 | ANKDD1A       | 20.60669979 | 0.729214634 | 0.212479012 | 3.431937238 | 0.000599286 | 0.004017945 |
| ENSG00000221818.4  | EBF2          | 1.504520575 | 1.565860409 | 0.456411237 | 3.430810378 | 0.000601781 | 0.004031415 |
| ENSG00000167552.9  | TUBA1A        | 343.1162795 | 0.442790661 | 0.129095852 | 3.429937166 | 0.000603721 | 0.004040537 |
| ENSG00000145632.10 | PLK2          | 310.795305  | 0.442960003 | 0.129194098 | 3.428639627 | 0.000606614 | 0.004057243 |
| ENSG00000131055.4  | COX4I2        | 3.044006676 | 0.991053675 | 0.289158779 | 3.427368445 | 0.000609462 | 0.00407191  |
| ENSG00000130635.11 | COL5A1        | 767.8365795 | 0.76373767  | 0.222849423 | 3.427146728 | 0.000609959 | 0.00407305  |
| ENSG00000091986.11 | CCDC80        | 224.7713494 | 0.763381401 | 0.222820221 | 3.425996965 | 0.000612547 | 0.004089233 |
| ENSG00000197299.6  | BLM           | 132.1842988 | 0.474704406 | 0.138601311 | 3.424963317 | 0.000614882 | 0.004101523 |
| ENSG00000152856    | WAS           | 82.43216841 | 0.667336303 | 0.194884114 | 3.424272456 | 0.000616448 | 0.004109762 |
| ENSG00000166974.8  | MAPRE2        | 469.000314  | 0.18369422  | 0.053653145 | 3.423736305 | 0.000617665 | 0.004116776 |
| ENSG00000111328.2  | CDK2AP1       | 193.0741357 | 0.367566025 | 0.107361002 | 3.423645632 | 0.000617871 | 0.004117048 |
| ENSG00000173039.14 | RELA          | 290.4419785 | 0.321598352 | 0.093956375 | 3.42284759  | 0.000619688 | 0.004126944 |
| ENSG00000163132.6  | MSX1          | 2.158145105 | 1.137207146 | 0.332248652 | 3.422759244 | 0.00061989  | 0.004127181 |
| ENSG00000130589.12 | HELZ2         | 441.9211685 | 0.704357968 | 0.205859061 | 3.421554357 | 0.000622643 | 0.004142189 |
| ENSG00000246022.2  | ALDH1L1-AS2   | 0.605281716 | 2.783850223 | 0.813709794 | 3.421183134 | 0.000623493 | 0.004146739 |
| ENSG00000153956.11 | CACNA2D1      | 95.17161748 | 0.471285162 | 0.137764708 | 3.420942629 | 0.000624045 | 0.00414805  |
| ENSG00000160183.9  | TMPRSS3       | 21.93263222 | 0.992284753 | 0.290067167 | 3.420879254 | 0.00062419  | 0.00414805  |
| ENSG00000248810.1  | RP11-362F19.1 | 1.097958358 | 1.9017352   | 0.555914972 | 3.420910202 | 0.000624119 | 0.00414805  |
| ENSG00000186074.14 | CD300LF       | 45.04649198 | 0.552941554 | 0.161728213 | 3.41895545  | 0.00062862  | 0.004173032 |
| ENSG00000113368.7  | LMNB1         | 498.3077966 | 0.391986473 | 0.114660088 | 3.418682835 | 0.00062925  | 0.004176101 |
| ENSG00000185862.5  | EVII2B        | 246.314097  | 0.637958946 | 0.186684164 | 3.417316884 | 0.000632416 | 0.004193759 |
| ENSG00000197057.4  | LYAR          | 23.94806425 | 0.817731613 | 0.239395774 | 3.415814734 | 0.000635915 | 0.004214714 |
| ENSG00000145220.9  | LYAR          | 82.79448412 | 0.384974514 | 0.112718001 | 3.415377422 | 0.000636937 | 0.004219241 |
| ENSG00000176390.10 | CRLF3         | 252.163653  | 0.404080798 | 0.118358025 | 3.414054935 | 0.000640037 | 0.004236393 |
| ENSG00000198498.5  | TMA16         | 127.8141165 | 0.268581266 | 0.078696905 | 3.412856801 | 0.000642857 | 0.00425393  |
| ENSG00000136731.8  | UGT1          | 1783.264785 | 0.239845883 | 0.070283099 | 3.412568431 | 0.000643573 | 0.004257302 |
| ENSG00000135912.6  | TLL4          | 196.9004783 | 0.228444204 | 0.066958659 | 3.411720125 | 0.000645544 | 0.004266785 |
| ENSG00000143119.8  | CD53          | 560.5996751 | 0.700173044 | 0.205219998 | 3.411816827 | 0.000645315 | 0.004266785 |
| ENSG00000211970.2  | IGHV4-61      | 6.755852807 | 1.549983658 | 0.454317852 | 3.411672362 | 0.000645657 | 0.004266785 |
| ENSG00000162733.12 | DDR2          | 614.3303208 | 0.431069091 | 0.126393637 | 3.41052841  | 0.000648371 | 0.00428245  |
| ENSG00000160991.11 | ORAI2         | 197.1392611 | 0.672605827 | 0.197219403 | 3.410444498 | 0.000648571 | 0.004282632 |
| ENSG00000237643.1  | RP11-462G2.1  | 33.11121174 | 0.768145504 | 0.225310272 | 3.409278664 | 0.000651349 | 0.004299837 |
| ENSG00000091136.9  | LAMB1         | 1649.619627 | 0.399919775 | 0.117319622 | 3.408805534 | 0.00065248  | 0.004306159 |
| ENSG00000258915.1  | RP11-114N19.2 | 1.152973919 | 1.761679329 | 0.516977831 | 3.407649659 | 0.00065525  | 0.004320991 |
| ENSG00000179862.5  | CITED4        | 6.656074656 | 0.931937396 | 0.27350519  | 3.407384683 | 0.000655886 | 0.004322452 |
| ENSG00000132768.9  | DPH2          | 132.6775563 | 0.277813935 | 0.081602606 | 3.404473807 | 0.000662917 | 0.004362317 |
| ENSG00000169504.10 | CLIC4         | 957.0246767 | 0.439705257 | 0.129196843 | 3.403374635 | 0.00066559  | 0.00437528  |
| ENSG00000174004.5  | NRROS         | 27.82567522 | 0.737312133 | 0.216660947 | 3.40306892  | 0.000666335 | 0.004379022 |
| ENSG00000103187.6  | COTL1         | 584.241447  | 0.423812269 | 0.124592073 | 3.401598996 | 0.000669929 | 0.004401479 |
| ENSG0000003249.9   | DBNDD1        | 15.59907272 | 0.872353574 | 0.256501283 | 3.400971583 | 0.000671468 | 0.004410429 |

## upreg\_DEGs

|                    |               |             |             |             |             |             |             |
|--------------------|---------------|-------------|-------------|-------------|-------------|-------------|-------------|
| ENSG00000175898.4  | CTD-2369P2.2  | 39.45030799 | 0.606905438 | 0.179259723 | 3.385620756 | 0.000710175 | 0.004628033 |
| ENSG00000253417.1  | RP11-109J4.1  | 1.953934094 | 1.632225785 | 0.482165717 | 3.385196679 | 0.000711273 | 0.004633976 |
| ENSG00000258947.2  | TUBB3         | 2.886311324 | 1.356426053 | 0.400716345 | 3.385003056 | 0.000711775 | 0.00463482  |
| ENSG00000169607.8  | CKAP2L        | 73.56662272 | 0.462282249 | 0.136647432 | 3.383029174 | 0.00071691  | 0.004662163 |
| ENSG00000249267.2  | LINC00939     | 2.096678271 | 1.819065527 | 0.538034387 | 3.380946592 | 0.000722366 | 0.004692739 |
| ENSG00000177885.9  | GRB2          | 778.785091  | 0.169520669 | 0.050143893 | 3.380684248 | 0.000723056 | 0.004695996 |
| ENSG00000126561.12 | STAT5A        | 244.1753176 | 0.477503053 | 0.141268903 | 3.380100238 | 0.000724594 | 0.004702305 |
| ENSG00000165757.8  | KIAA1462      | 112.0591224 | 0.608664226 | 0.180163052 | 3.378407607 | 0.000729069 | 0.004727651 |
| ENSG00000147454.9  | SLC25A37      | 444.7291826 | 0.448509771 | 0.132793183 | 3.377506006 | 0.000731464 | 0.004740707 |
| ENSG00000124508.12 | BTN2A2        | 143.3805017 | 0.556795147 | 0.164904592 | 3.376468419 | 0.000734228 | 0.004756147 |
| ENSG00000163406.6  | SLC15A2       | 62.82550449 | 0.60837714  | 0.18021404  | 3.375858726 | 0.000735857 | 0.004760505 |
| ENSG00000181773.6  | GPR3          | 0.81097206  | 2.011435648 | 0.595817757 | 3.375924304 | 0.000735682 | 0.004760505 |
| ENSG00000068878.10 | PSME4         | 699.4011177 | 0.325211738 | 0.096341697 | 3.375607313 | 0.00073653  | 0.004763619 |
| ENSG00000137076.14 | TLN1          | 2729.282511 | 0.254893919 | 0.075520492 | 3.375162307 | 0.000737722 | 0.004768851 |
| ENSG00000151304.5  | SRFBP1        | 181.2470138 | 0.217120951 | 0.064338756 | 3.374652603 | 0.000739089 | 0.004775211 |
| ENSG00000180398.7  | MCFD2         | 767.5754366 | 0.255446445 | 0.075703929 | 3.374282545 | 0.000740084 | 0.004780395 |
| ENSG00000198216.6  | CACNA1E       | 9.492622487 | 1.008873064 | 0.299022419 | 3.373904425 | 0.000741101 | 0.004780764 |
| ENSG00000203710.6  | CR1           | 144.7393237 | 1.128951949 | 0.334593277 | 3.374102306 | 0.000740568 | 0.004780764 |
| ENSG00000157654.13 | PALM2-AKAP2   | 1.286160653 | 1.66431208  | 0.493395716 | 3.373179027 | 0.000743056 | 0.004791716 |
| ENSG00000163507.9  | KIAA1524      | 95.12576043 | 0.39051985  | 0.11577367  | 3.373131819 | 0.000743184 | 0.004791716 |
| ENSG00000106462.6  | EZH2          | 133.8762007 | 0.387810392 | 0.114985058 | 3.372702504 | 0.000744343 | 0.004796708 |
| ENSG00000108592.12 | FTSJ3         | 295.3693474 | 0.274842927 | 0.081509722 | 3.37190361  | 0.000746506 | 0.004809398 |
| ENSG00000115091.7  | ACTR3         | 2925.176379 | 0.304293743 | 0.090267863 | 3.371008614 | 0.000748935 | 0.004822554 |
| ENSG00000187764.7  | SEMA4D        | 439.4486793 | 0.565554297 | 0.167810848 | 3.370189131 | 0.000751166 | 0.00483192  |
| ENSG00000187479.4  | C11orf96      | 90.48773158 | 0.87708963  | 0.260265266 | 3.369983409 | 0.000751727 | 0.004834279 |
| ENSG00000123136.10 | DDX39A        | 246.9253657 | 0.289085925 | 0.085805356 | 3.369089502 | 0.000754169 | 0.004846931 |
| ENSG00000138385.11 | SSB           | 327.3405478 | 0.258022737 | 0.076587827 | 3.36897843  | 0.000754473 | 0.004846931 |
| ENSG00000158077.4  | NLRP14        | 5.712338572 | 1.041812671 | 0.309273811 | 3.368577074 | 0.000755573 | 0.004847849 |
| ENSG00000163947.7  | ARHGEF3       | 203.7090664 | 0.443171004 | 0.131563318 | 3.368499769 | 0.000755785 | 0.004847849 |
| ENSG00000187800.9  | PEAR1         | 36.75437011 | 0.506561609 | 0.150372051 | 3.368721817 | 0.000755176 | 0.004847849 |
| ENSG00000162430.12 | SEPN1         | 275.6386649 | 0.434133628 | 0.128902958 | 3.367910505 | 0.000757402 | 0.00485572  |
| ENSG00000168899.4  | VAMP5         | 30.29565592 | 0.764855653 | 0.227175774 | 3.366801127 | 0.000760455 | 0.004871531 |
| ENSG00000006634.3  | DBF4          | 108.6934921 | 0.317075097 | 0.09420572  | 3.365773314 | 0.000763294 | 0.00488846  |
| ENSG00000204592.5  | HLA-E         | 5794.295366 | 0.380151564 | 0.113009161 | 3.363900418 | 0.000768493 | 0.004912906 |
| ENSG00000169047.5  | IRS1          | 233.4754639 | 0.580760729 | 0.172784626 | 3.361182891 | 0.000776094 | 0.004958955 |
| ENSG00000233912.1  | AC026202.3    | 4.878658928 | 0.939169224 | 0.279429791 | 3.361020382 | 0.000776551 | 0.0049606   |
| ENSG00000154978.8  | VOPP1         | 419.6950574 | 0.244161165 | 0.072657072 | 3.360459749 | 0.000778129 | 0.004969404 |
| ENSG00000180353.6  | HCLS1         | 366.325592  | 0.692814189 | 0.206184557 | 3.360165282 | 0.000778959 | 0.004972152 |
| ENSG00000231528.2  | FAM225A       | 2.247346368 | 1.47801043  | 0.439855912 | 3.360214993 | 0.000778818 | 0.004972152 |
| ENSG00000196628.9  | TCF4          | 955.376967  | 0.586929128 | 0.174768344 | 3.358326306 | 0.00078416  | 0.005000224 |
| ENSG00000237683.5  | AL627309.1    | 7.891626004 | 0.889875012 | 0.265038268 | 3.357534064 | 0.000786411 | 0.005012008 |
| ENSG00000166840.9  | GLYATL1       | 4.964231664 | 1.072276872 | 0.319496308 | 3.356147929 | 0.000790363 | 0.005035908 |
| ENSG00000120820.8  | GLT8D2        | 53.84704027 | 0.518354299 | 0.154525126 | 3.354498475 | 0.00079509  | 0.005063435 |
| ENSG00000005302.13 | MSL3          | 238.7117811 | 0.287401155 | 0.085705617 | 3.353352614 | 0.000798389 | 0.005081828 |
| ENSG00000107651.8  | SEC23IP       | 558.5046613 | 0.238894742 | 0.071242049 | 3.353282844 | 0.000798591 | 0.005081828 |
| ENSG00000132589.11 | FLOT2         | 325.3813252 | 0.310436297 | 0.092605708 | 3.352237163 | 0.000801613 | 0.005098456 |
| ENSG00000142871.11 | CYR61         | 116.9213537 | 1.303805342 | 0.388928951 | 3.352296963 | 0.00080144  | 0.005098456 |
| ENSG00000151023.12 | ENK1          | 18.34024391 | 1.194774796 | 0.356420784 | 3.352146819 | 0.000801875 | 0.005098818 |
| ENSG00000223559.1  | RP11-700P18.1 | 40.66389127 | 0.312046137 | 0.09312553  | 3.350811913 | 0.00080575  | 0.005120843 |
| ENSG00000149256.10 | TENM4         | 33.15599194 | 0.879992964 | 0.262649305 | 3.350448478 | 0.000806808 | 0.005126259 |
| ENSG00000111602.7  | TIMELESS      | 119.8437862 | 0.406971908 | 0.121479942 | 3.350116094 | 0.000807777 | 0.005129969 |
| ENSG00000125869.5  | LAMP5         | 8.497820046 | 0.811787957 | 0.24231704  | 3.350106774 | 0.000808004 | 0.005129969 |
| ENSG00000173083.10 | HPSE          | 158.093383  | 0.37948466  | 0.113316733 | 3.348884588 | 0.000811376 | 0.00514871  |
| ENSG00000169992.5  | NLGN2         | 38.59491488 | 0.608959779 | 0.181860343 | 3.348502319 | 0.000812496 | 0.005154505 |
| ENSG00000049540.12 | ELN           | 65.62456562 | 0.669728235 | 0.200045737 | 3.347875568 | 0.000814336 | 0.005164859 |
| ENSG00000055130.11 | CUL1          | 502.4763132 | 0.1892837   | 0.056551049 | 3.347129812 | 0.00081653  | 0.005177455 |
| ENSG00000154240.12 | CEP112        | 37.85779467 | 0.426298966 | 0.127376743 | 3.346756669 | 0.00081763  | 0.005181789 |
| ENSG00000243063.1  | IGKV3-7       | 0.918608276 | 1.987087542 | 0.593898413 | 3.345837431 | 0.000820345 | 0.005196352 |
| ENSG00000189233.7  | NUCGC         | 68.54931842 | 0.768233112 | 0.22963384  | 3.34546996  | 0.000821433 | 0.005200596 |
| ENSG00000124802.7  | EEF1E1        | 52.15505576 | 0.412346902 | 0.123265442 | 3.345194693 | 0.000822248 | 0.005204437 |
| ENSG00000120280.5  | CXorf21       | 53.09460482 | 0.564487592 | 0.168782985 | 3.344457929 | 0.000824435 | 0.005216953 |
| ENSG00000158710.10 | TAGLN2        | 1001.197631 | 0.27546439  | 0.082394089 | 3.343254256 | 0.00082802  | 0.005235644 |
| ENSG00000183748.4  | MRC1L1        | 23.35132162 | 0.728916474 | 0.218058688 | 3.342753638 | 0.000829515 | 0.005241104 |
| ENSG00000207142.1  | Y_RNA         | 9.256921622 | 0.826942911 | 0.247408164 | 3.342423707 | 0.000830502 | 0.005243346 |
| ENSG00000012048.15 | BRCA1         | 223.8967619 | 0.346549416 | 0.10372843  | 3.340929938 | 0.000834983 | 0.005266295 |
| ENSG00000183625.10 | CCR3          | 16.57269666 | 1.101884075 | 0.329821497 | 3.34084978  | 0.000835224 | 0.005266442 |
| ENSG00000213985.4  | AC078899.1    | 78.6242994  | 0.348937304 | 0.104452445 | 3.340633197 | 0.000835876 | 0.005266588 |
| ENSG00000146112.7  | PPP1R18       | 328.3694439 | 0.624328583 | 0.186926868 | 3.339961725 | 0.000837899 | 0.005276839 |
| ENSG00000147400.8  | CETN2         | 130.4963975 | 0.339070959 | 0.101519688 | 3.339952721 | 0.000837927 | 0.005276839 |
| ENSG00000131467.6  | PSME3         | 466.5664579 | 0.21368863  | 0.06401782  | 3.337955428 | 0.000843973 | 0.005312228 |
| ENSG00000067369.9  | TP53BP1       | 460.2471909 | 0.221962349 | 0.066498471 | 3.337856441 | 0.000844274 | 0.005312777 |
| ENSG00000197085.7  | NPSR1-AS1     | 0.901689891 | 2.413499248 | 0.723153378 | 3.33746522  | 0.000845463 | 0.005318918 |
| ENSG00000116819.6  | TFAP2E        | 2.910093341 | 0.847852231 | 0.254098988 | 3.336700542 | 0.000847792 | 0.005332224 |
| ENSG00000110777.7  | POU2AF1       | 151.2935027 | 1.041541177 | 0.312407259 | 3.333921177 | 0.000856309 | 0.005381712 |
| ENSG00000196510.8  | ANAPC7        | 236.1829796 | 0.192139919 | 0.057698974 | 3.330040464 | 0.000868334 | 0.005454529 |
| ENSG00000129467.9  | ADCY4         | 57.55121101 | 0.491485409 | 0.147601001 | 3.329824353 | 0.000869008 | 0.005457387 |
| ENSG00000086991.8  | NOX4          | 4.364927547 | 0.997618954 | 0.299609669 | 3.329728837 | 0.000869306 | 0.005457882 |
| ENSG00000118162.9  | KPTN          | 14.77931087 | 0.48188961  | 0.144762848 | 3.328816531 | 0.000872158 | 0.00547303  |
| ENSG00000113758.9  | DBN1          | 86.93549821 | 0.521778863 | 0.156805518 | 3.327554226 | 0.000876119 | 0.005496501 |
| ENSG00000127564.12 | PKMYT1        | 34.27291004 | 0.662073046 | 0.199013506 | 3.326774438 | 0.000878575 | 0.00551     |
| ENSG00000211592.2  | IGKC          | 3719.544761 | 1.066456451 | 0.320571958 | 3.326730314 | 0.000878414 | 0.00551     |
| ENSG00000163630.6  | SYNPR         | 2.23163025  | 1.52911782  | 0.45968172  | 3.326470801 | 0.000879532 | 0.005513744 |
| ENSG00000184304.10 | PRKD1         | 28.60846476 | 0.504308827 | 0.151616221 | 3.326219475 | 0.000880326 | 0.005517329 |
| ENSG00000174255.5  | ZNF80         | 3.282075414 | 1.371080375 | 0.412325235 | 3.325240028 | 0.000883424 | 0.005533963 |
| ENSG00000196507.6  | TCEAL3        | 32.37746024 | 0.448676331 | 0.134933544 | 3.325165239 | 0.000883662 | 0.005534055 |
| ENSG00000103356.11 | EARS2         | 223.5610419 | 0.278536882 | 0.08378404  | 3.32446229  | 0.000885892 | 0.005546348 |
| ENSG00000120158.7  | RCL1          | 91.07355172 | 0.288235891 | 0.086737939 | 3.323065955 | 0.000890339 | 0.005567468 |
| ENSG00000265185.2  | SNORD3B-1     | 15.30484251 | 0.927390806 | 0.279131685 | 3.322413241 | 0.000892424 | 0.005576307 |
| ENSG00000211937.2  | IGHV2-5       | 141.3620486 | 1.239315053 | 0.373041249 | 3.322193068 | 0.000893129 | 0.005579309 |
| ENSG00000224689.3  | ZNF812        | 1.050336698 | 1.991886925 | 0.599707763 | 3.321429285 | 0.000895577 | 0.005593198 |
| ENSG00000146918.15 | NCAPG2        | 158.5159957 | 0.33689431  | 0.101434835 | 3.321288098 | 0.00089603  | 0.005594625 |
| ENSG00000129219.9  | PLD2          | 135.78541   | 0.222222255 | 0.066917071 | 3.32086047  | 0.000897404 | 0.005600394 |
| ENSG00000265451.1  | RP11-204L24.2 | 0.677909824 | 1.739306784 | 0.523861531 | 3.320165122 | 0.000899642 | 0.005611549 |
| ENSG00000144893.8  | MED12L        | 8.814455398 | 0.934714935 | 0.281611747 | 3.319161729 | 0.000902881 | 0.005630342 |
| ENSG00000152556.11 | PFKM          | 219.4911751 | 0.222207491 | 0.066972247 | 3.317904055 | 0.000906956 | 0.005654338 |
| ENSG00000120800.4  | UTP20         | 146.0828194 | 0.296006122 | 0.089296222 | 3.31487844  | 0.00        |             |



## upreg\_DEGs

|                    |               |             |             |             |             |             |             |
|--------------------|---------------|-------------|-------------|-------------|-------------|-------------|-------------|
| ENSG00000258791.3  | LINC00520     | 2.376938059 | 1.793721468 | 0.542932712 | 3.303763855 | 0.000953962 | 0.005892998 |
| ENSG00000134294.9  | SLC38A2       | 1694.874633 | 0.311065904 | 0.094205043 | 3.30200903  | 0.00095995  | 0.005925363 |
| ENSG00000058091.12 | CDK14         | 115.5266774 | 0.758391274 | 0.229701003 | 3.301645469 | 0.000961195 | 0.005928887 |
| ENSG00000155287.6  | SLC25A28      | 115.1107243 | 0.317533983 | 0.096212824 | 3.300329111 | 0.000965715 | 0.005953569 |
| ENSG00000088325.11 | TPX2          | 291.3041263 | 0.441096454 | 0.133693676 | 3.299306788 | 0.000969239 | 0.005972337 |
| ENSG00000142178.7  | SIK1          | 204.112533  | 1.076784364 | 0.326376707 | 3.299207151 | 0.000969583 | 0.005972979 |
| ENSG00000113742.8  | CPEB4         | 915.7128636 | 0.31446436  | 0.09531955  | 3.299054198 | 0.000970112 | 0.005974756 |
| ENSG00000125977.6  | EIF2S2        | 307.5270997 | 0.26549987  | 0.080496897 | 3.298262161 | 0.000972853 | 0.005987192 |
| ENSG00000131378.9  | RFTN1         | 299.5788071 | 0.609398508 | 0.18477894  | 3.297986819 | 0.000973807 | 0.005988625 |
| ENSG00000154783.6  | FGD5          | 162.7129756 | 0.428218517 | 0.129868045 | 3.29733552  | 0.000976068 | 0.005999566 |
| ENSG00000235513.1  | RP4-756G23.5  | 3.681590492 | 1.141994826 | 0.346386927 | 3.296876228 | 0.000977666 | 0.006006419 |
| ENSG00000128513.10 | POT1          | 151.6621824 | 0.32610998  | 0.098920753 | 3.296679124 | 0.000978352 | 0.006007671 |
| ENSG00000099860.4  | GADD45B       | 130.192224  | 0.493247682 | 0.149645102 | 3.29611644  | 0.000980314 | 0.006018232 |
| ENSG00000163902.7  | RPN1          | 2314.825908 | 0.3362713   | 0.10205592  | 3.294971028 | 0.000984318 | 0.006038349 |
| ENSG00000120694.15 | HSPH1         | 769.3865089 | 0.313592878 | 0.095212598 | 3.293606974 | 0.000989107 | 0.00606175  |
| ENSG00000125744.7  | RTN2          | 17.78223642 | 0.475499258 | 0.14436999  | 3.293615642 | 0.000989077 | 0.00606175  |
| ENSG00000152104.7  | PTPN14        | 175.2106528 | 0.423374308 | 0.128541571 | 3.29367616  | 0.000988864 | 0.00606175  |
| ENSG00000143621.12 | ILF2          | 788.6114059 | 0.238130089 | 0.07232531  | 3.29248625  | 0.000993058 | 0.00608147  |
| ENSG00000177663.9  | IL17RA        | 390.1495431 | 0.347634006 | 0.105617659 | 3.29143829  | 0.000996765 | 0.006099672 |
| ENSG00000145912.4  | NHP2          | 134.2525745 | 0.271542548 | 0.082513452 | 3.290888218 | 0.000998716 | 0.006108608 |
| ENSG00000136144.7  | RCBTB1        | 180.4026306 | 0.261578506 | 0.079495835 | 3.290468059 | 0.001000209 | 0.006114733 |
| ENSG00000002079.8  | MYH16         | 0.56647377  | 2.084885895 | 0.633699884 | 3.29002095  | 0.001001799 | 0.006122954 |
| ENSG00000173786.12 | CNP           | 366.3752842 | 0.279384376 | 0.084947217 | 3.28891735  | 0.001005736 | 0.006141814 |
| ENSG00000225670.3  | CTA-134P22.2  | 6.86150955  | 0.819623547 | 0.249238322 | 3.288513335 | 0.00100718  | 0.006146787 |
| ENSG00000116852.10 | KIF21B        | 167.5756635 | 0.571602697 | 0.173928293 | 3.286427347 | 0.001014669 | 0.006187943 |
| ENSG00000068489.8  | PRR11         | 95.41332947 | 0.443556633 | 0.134976203 | 3.286183963 | 0.001015547 | 0.006190259 |
| ENSG00000224543.3  | ACO12318.3    | 8.593459669 | 0.516525519 | 0.157195054 | 3.285889128 | 0.00101661  | 0.006195225 |
| ENSG00000197217.8  | ENTPD4        | 830.5785143 | 0.175002649 | 0.053262215 | 3.285680992 | 0.001017362 | 0.006198287 |
| ENSG00000100263.9  | RHBDD3        | 61.10411382 | 0.374327713 | 0.113948719 | 3.285054151 | 0.001019628 | 0.006209054 |
| ENSG00000239636.1  | RP4-728D4.2   | 2.298932606 | 1.110702488 | 0.338225688 | 3.283909321 | 0.001023779 | 0.006227664 |
| ENSG00000214185.3  | XPOTP1        | 33.82090633 | 0.353731482 | 0.107734748 | 3.283355554 | 0.001025792 | 0.006235914 |
| ENSG00000125900.8  | SIRPD         | 1.226722804 | 1.523116768 | 0.463939171 | 3.28300963  | 0.001027052 | 0.006239952 |
| ENSG00000173432.6  | SAA1          | 10.84975793 | 2.918389291 | 0.889182448 | 3.282104025 | 0.001030356 | 0.006257546 |
| ENSG00000133110.10 | POSTN         | 685.2099508 | 0.849011289 | 0.258696329 | 3.281883791 | 0.001031161 | 0.006260207 |
| ENSG00000204261.4  | TAPSAR1       | 119.9661296 | 0.374899639 | 0.114236753 | 3.281777796 | 0.001031549 | 0.006260207 |
| ENSG00000167264.13 | DUS2          | 86.46357288 | 0.340772887 | 0.103890764 | 3.280107628 | 0.001037675 | 0.006295811 |
| ENSG00000094755.12 | GABRP         | 34.03173348 | 1.266434657 | 0.386348552 | 3.277958857 | 0.001045606 | 0.006339339 |
| ENSG00000197147.8  | LRRRC8B       | 356.9367874 | 0.29135561  | 0.088882533 | 3.277984986 | 0.00104551  | 0.006339339 |
| ENSG00000151835.9  | SACS          | 391.0899589 | 0.488353623 | 0.148988836 | 3.277786683 | 0.001046244 | 0.006341662 |
| ENSG00000136982.5  | DSCC1         | 34.50668479 | 0.519515706 | 0.158543817 | 3.276795752 | 0.001049923 | 0.006356221 |
| ENSG00000141968.3  | VAV1          | 152.6371427 | 0.6074443   | 0.185377019 | 3.276804773 | 0.001049889 | 0.006356221 |
| ENSG00000185507.15 | IRF7          | 175.2615012 | 0.526521251 | 0.16067757  | 3.276880842 | 0.001049607 | 0.006356221 |
| ENSG00000244405.3  | ETV5          | 83.46654925 | 0.365972005 | 0.111692572 | 3.276601107 | 0.001050647 | 0.006359058 |
| ENSG00000168701.14 | TMEM208       | 120.8930318 | 0.29124083  | 0.088894883 | 3.276238403 | 0.001051997 | 0.006365683 |
| ENSG0000013392.6   | RWDD2A        | 67.14788135 | 0.29844252  | 0.091108093 | 3.275697152 | 0.001054015 | 0.006376344 |
| ENSG00000163131.6  | CTSS          | 3978.516591 | 0.3603874   | 0.110026628 | 3.275456189 | 0.001054915 | 0.006377304 |
| ENSG00000224789.1  | ACO12363.4    | 1.256462733 | 1.394993304 | 0.42588151  | 3.275543249 | 0.00105459  | 0.006377304 |
| ENSG00000089195.10 | TRMT6         | 95.42512338 | 0.291255868 | 0.089043452 | 3.270940878 | 0.001071903 | 0.006468838 |
| ENSG00000253626.2  | EIF5A1        | 197.7368991 | 0.342084903 | 0.10458773  | 3.27079383  | 0.001072461 | 0.006470634 |
| ENSG00000143878.8  | RHOB          | 488.535139  | 0.587910969 | 0.179750035 | 3.27071408  | 0.001072763 | 0.006470891 |
| ENSG00000142512.10 | SIGLEC10      | 179.1123558 | 0.698167701 | 0.213483259 | 3.270362765 | 0.001074096 | 0.006477364 |
| ENSG00000113460.8  | BRIX1         | 164.7473645 | 0.253115614 | 0.077407398 | 3.269915022 | 0.001075798 | 0.006486054 |
| ENSG00000196411.5  | EPHB4         | 322.2401027 | 0.400359076 | 0.122498332 | 3.268281852 | 0.001082026 | 0.00652202  |
| ENSG00000075213.6  | SEMA3A        | 117.8720569 | 0.510853455 | 0.15638933  | 3.266549283 | 0.001088669 | 0.006557299 |
| ENSG00000171840.7  | NINJ2         | 14.27737978 | 0.520379605 | 0.159309158 | 3.266476392 | 0.001089949 | 0.0065574   |
| ENSG00000214063.6  | TSPAN4        | 97.79515506 | 0.396781043 | 0.121506675 | 3.265508189 | 0.001092679 | 0.006578268 |
| ENSG00000240972.1  | MIF           | 200.6321573 | 0.443901009 | 0.135943864 | 3.265325807 | 0.001093382 | 0.006580914 |
| ENSG00000244642.2  | RN7SL396P     | 5.188202686 | 0.956361623 | 0.292944211 | 3.264654452 | 0.001095977 | 0.006594936 |
| ENSG00000157470.7  | FAM81A        | 43.35219697 | 0.47558765  | 0.145739969 | 3.263261638 | 0.001101378 | 0.006624233 |
| ENSG00000234231.2  | ACO93616.4    | 4.576523411 | 1.098555869 | 0.336683326 | 3.262875778 | 0.001102879 | 0.006631656 |
| ENSG00000132530.12 | XAF1          | 497.9613497 | 0.655363653 | 0.200869602 | 3.262632306 | 0.001103826 | 0.006635753 |
| ENSG00000128692.7  | EIF2S2P4      | 237.2188742 | 0.312084083 | 0.095727238 | 3.260138804 | 0.001113577 | 0.006689384 |
| ENSG00000161929.10 | SCIMP         | 83.31851209 | 0.707168225 | 0.216917693 | 3.260076282 | 0.001113823 | 0.006689384 |
| ENSG00000145358.2  | DDIT4L        | 4.307323711 | 0.921706981 | 0.282774473 | 3.259512689 | 0.001116038 | 0.006698086 |
| ENSG00000129680.11 | MAP7D3        | 71.56751006 | 0.445043363 | 0.136544151 | 3.259336697 | 0.001116731 | 0.006698769 |
| ENSG00000163872.11 | YEATS2        | 393.1458249 | 0.177760378 | 0.054546013 | 3.258906889 | 0.001118424 | 0.006704671 |
| ENSG00000228649.4  | ACO05682.5    | 8.591767577 | 0.751328429 | 0.230629545 | 3.257728448 | 0.001123078 | 0.006728739 |
| ENSG00000129048.6  | ACKR4         | 70.48765246 | 1.089132108 | 0.33434479  | 3.257511829 | 0.001123936 | 0.006732256 |
| ENSG00000243444.3  | PALM2         | 7.900588861 | 0.809356181 | 0.248533578 | 3.256526493 | 0.001127844 | 0.006752417 |
| ENSG00000107317.7  | PTGDS         | 142.5107085 | 1.224356086 | 0.376002963 | 3.25624053  | 0.001128981 | 0.006755972 |
| ENSG00000133069.10 | TMCC2         | 10.16784919 | 0.632710811 | 0.194383307 | 3.25496474  | 0.001134064 | 0.006778247 |
| ENSG00000138182.10 | KIF20B        | 364.1934807 | 0.365901322 | 0.112409652 | 3.255070317 | 0.001133643 | 0.006778247 |
| ENSG00000143545.4  | RAB13         | 89.72453525 | 0.433971049 | 0.13332497  | 3.254987038 | 0.001133975 | 0.006778247 |
| ENSG00000189058.4  | APOD          | 37.18937263 | 0.898416498 | 0.27617166  | 3.253108947 | 0.001141497 | 0.006814492 |
| ENSG00000153363.8  | LINC00467     | 26.81516745 | 0.435430206 | 0.133890049 | 3.252147628 | 0.001145365 | 0.006834305 |
| ENSG00000250565.2  | ATP6V1E2      | 21.3875038  | 0.573176015 | 0.176327859 | 3.25062652  | 0.00115151  | 0.00686768  |
| ENSG00000231407.1  | RP11-576I22.2 | 4.102969085 | 1.103537645 | 0.339496774 | 3.250509962 | 0.001151982 | 0.00686885  |
| ENSG00000143515.12 | ATP8B2        | 283.2485573 | 0.484980656 | 0.149206849 | 3.250391389 | 0.001152463 | 0.006870069 |
| ENSG00000183484.7  | GPR132        | 62.87862273 | 0.705488014 | 0.217060458 | 3.25019131  | 0.001153274 | 0.006873259 |
| ENSG00000139044.6  | B4GALNT3      | 473.9957394 | 0.600204538 | 0.184673288 | 3.25008855  | 0.001153691 | 0.006874097 |
| ENSG00000235884.2  | LINC00941     | 0.834830037 | 1.951953445 | 0.600802612 | 3.24890972  | 0.001158442 | 0.006900996 |
| ENSG0000008438.4   | PGLYRP1       | 1.598156807 | 1.811990411 | 0.557921794 | 3.247749832 | 0.001163215 | 0.006925781 |
| ENSG00000137288.5  | UQC2C         | 113.1881479 | 0.253043447 | 0.077928704 | 3.247114778 | 0.001165814 | 0.006938027 |
| ENSG00000226535.1  | RP11-417L14.1 | 3.664999197 | 0.772607153 | 0.237956142 | 3.246846867 | 0.001169912 | 0.006942901 |
| ENSG00000133026.8  | MYH10         | 137.3068915 | 0.566812101 | 0.174609669 | 3.246166737 | 0.001169703 | 0.006956185 |
| ENSG00000179041.2  | RRS1          | 68.29324469 | 0.426281565 | 0.131354391 | 3.24527838  | 0.001173359 | 0.006974591 |
| ENSG00000122786.15 | CALD1         | 1165.397211 | 0.467819879 | 0.144163326 | 3.245068577 | 0.001174223 | 0.0069764   |
| ENSG00000154429.6  | CCSAP         | 122.8519873 | 0.316525151 | 0.09753836  | 3.245135044 | 0.001173949 | 0.0069764   |
| ENSG00000184933.3  | ORGA2         | 1.3234935   | 1.229267605 | 0.378833339 | 3.244877044 | 0.001175014 | 0.006977764 |
| ENSG00000187634.6  | SAMD11        | 35.41377146 | 0.622011161 | 0.191772268 | 3.243488586 | 0.001180755 | 0.007009768 |
| ENSG00000197329.7  | PELL1         | 603.4355097 | 0.260916649 | 0.080444475 | 3.2434378   | 0.001180966 | 0.007009768 |
| ENSG00000248927.1  | CTD-2334D19.1 | 3.472891073 | 0.840384698 | 0.259179307 | 3.242483774 | 0.001184927 | 0.007029927 |
| ENSG00000181195.6  | PENK          | 0.472067266 | 3.264253158 | 1.006800567 | 3.242204329 | 0.00118609  | 0.007035147 |
| ENSG00000128059.4  | PPAT          | 122.1684055 | 0.331298314 | 0.102199838 | 3.241671606 | 0.001188309 | 0.007046631 |
| ENSG00000109047.7  | RCVRN         | 0.575910405 | 2.08437367  | 0.643065111 | 3.241310461 | 0.001189815 | 0.007053885 |
| ENSG000001         |               |             |             |             |             |             |             |

upreg\_DEGs

|                    |                |             |             |             |             |             |             |
|--------------------|----------------|-------------|-------------|-------------|-------------|-------------|-------------|
| ENSG00000163071.6  | SPATA18        | 85.39084023 | 0.455384969 | 0.140992739 | 3.22984695  | 0.001238565 | 0.007283921 |
| ENSG00000116885.14 | OSCP1          | 12.97491258 | 0.557772976 | 0.172701913 | 3.229686151 | 0.001239262 | 0.007286297 |
| ENSG00000133574.5  | GIMAP4         | 346.7837842 | 0.47261129  | 0.146351701 | 3.22929558  | 0.001240956 | 0.007292812 |
| ENSG00000198624.8  | CCDC69         | 324.0790335 | 0.50210563  | 0.155509705 | 3.2287736   | 0.001243223 | 0.00730441  |
| ENSG00000113657.8  | DPYSL3         | 492.3884718 | 0.487420963 | 0.151080467 | 3.226234148 | 0.001254307 | 0.007359113 |
| ENSG00000204839.4  | MROH6          | 60.50285542 | 0.857594625 | 0.265865513 | 3.22567081  | 0.001256778 | 0.007371875 |
| ENSG00000102312.16 | PORCN          | 21.33839425 | 0.405865649 | 0.125833066 | 3.225429242 | 0.001257839 | 0.007374623 |
| ENSG00000089154.6  | GCN1L1         | 1041.150592 | 0.25269216  | 0.078348644 | 3.225226977 | 0.001258728 | 0.007378098 |
| ENSG00000166452.7  | AKIP1          | 59.95536205 | 0.245950904 | 0.076302077 | 3.223384113 | 0.001266856 | 0.007417004 |
| ENSG0000052749.9   | RRP12          | 127.440235  | 0.462205837 | 0.143509406 | 3.220735488 | 0.001278621 | 0.007471829 |
| ENSG00000185070.6  | FLRT2          | 134.9946916 | 0.749271653 | 0.232734161 | 3.219431348 | 0.001284451 | 0.007497224 |
| ENSG00000144369.8  | FAM171B        | 95.59542961 | 0.494674711 | 0.153735687 | 3.217696042 | 0.001292247 | 0.007533769 |
| ENSG00000115380.14 | EFEMP1         | 292.7994407 | 0.606962432 | 0.18865127  | 3.217377925 | 0.001293681 | 0.007540362 |
| ENSG00000258082.1  | RP11-443B7.3   | 1.172284429 | 1.820295933 | 0.565907519 | 3.216596124 | 0.001297211 | 0.007557398 |
| ENSG00000123975.4  | CKS2           | 125.9902466 | 0.519739692 | 0.161599183 | 3.216227223 | 0.00129888  | 0.00756535  |
| ENSG00000139278.5  | GLIPR1         | 305.0437274 | 0.466895359 | 0.145187144 | 3.215817496 | 0.001300735 | 0.007574092 |
| ENSG00000261222.2  | CTD-2006K23.1  | 0.793602193 | 1.646986148 | 0.512160534 | 3.215761544 | 0.001300989 | 0.007574092 |
| ENSG00000224962.3  | PSAT1P4        | 0.460124604 | 2.500048836 | 0.777667949 | 3.214802462 | 0.001305343 | 0.007597665 |
| ENSG00000135446.12 | CDK4           | 283.6399923 | 0.217249917 | 0.067597808 | 3.213860382 | 0.001309633 | 0.007611957 |
| ENSG00000177494.5  | ZBED2          | 4.381662974 | 1.81921     | 0.56604329  | 3.213906129 | 0.001309425 | 0.007611957 |
| ENSG00000118193.7  | KIF14          | 114.6693868 | 0.461787522 | 0.14376453  | 3.212110256 | 0.001317638 | 0.007655618 |
| ENSG00000076662.5  | ICAM3          | 214.5489911 | 0.521335774 | 0.16231426  | 3.211891388 | 0.001318642 | 0.007658954 |
| ENSG00000188643.6  | S100A16        | 680.0735431 | 0.502856381 | 0.156584434 | 3.211407221 | 0.001320866 | 0.007668293 |
| ENSG00000158106.8  | RHPN1          | 23.80861335 | 0.610679602 | 0.190246397 | 3.20994044  | 0.001327625 | 0.007702142 |
| ENSG00000128228.4  | SDF2L1         | 108.9641977 | 0.577265024 | 0.179870699 | 3.209333296 | 0.001330432 | 0.007716628 |
| ENSG00000134363.7  | FST            | 14.37466951 | 1.058921635 | 0.329958252 | 3.209259443 | 0.001330774 | 0.007716813 |
| ENSG00000171236.9  | LRG1           | 181.49066   | 0.778252559 | 0.242538325 | 3.208781791 | 0.001332986 | 0.007726044 |
| ENSG00000183186.6  | C2CD4C         | 3.775146066 | 0.847377044 | 0.264109991 | 3.208424797 | 0.001334642 | 0.007732041 |
| ENSG00000185633.6  | NDUFA4L2       | 12.66930443 | 0.615660984 | 0.191898219 | 3.208268366 | 0.001335368 | 0.007734448 |
| ENSG00000086730.12 | LAT2           | 102.4062035 | 0.625192347 | 0.194895178 | 3.20783898  | 0.001337364 | 0.007740602 |
| ENSG00000241978.5  | AKAP2          | 14.61868722 | 0.633856572 | 0.197593426 | 3.207882899 | 0.001337159 | 0.007740602 |
| ENSG00000120738.7  | EGR1           | 308.9296453 | 1.166280911 | 0.363720528 | 3.206530346 | 0.001343461 | 0.007770824 |
| ENSG00000181234.8  | TMEM132C       | 5.482192683 | 0.918820071 | 0.286563595 | 3.20633914  | 0.001344354 | 0.00777376  |
| ENSG00000226887.3  | ERVMER34-1     | 6.209855719 | 0.737896321 | 0.230145323 | 3.206219062 | 0.001344916 | 0.00777376  |
| ENSG00000169255.9  | B3GALNT1       | 28.02377828 | 0.577528138 | 0.180142266 | 3.205955782 | 0.001346147 | 0.007778778 |
| ENSG00000177875.3  | C12orf68       | 2.414534602 | 1.042376834 | 0.325278056 | 3.204571645 | 0.001352636 | 0.007812651 |
| ENSG00000253214.1  | RP11-1149M10.2 | 2.190831459 | 1.100392846 | 0.343378805 | 3.20460328  | 0.001352488 | 0.007812651 |
| ENSG00000070540.8  | WIP1           | 335.8018231 | 0.366418288 | 0.114345927 | 3.204471715 | 0.001353106 | 0.007813551 |
| ENSG00000162434.7  | JAK1           | 2417.582844 | 0.185174132 | 0.057809922 | 3.203193727 | 0.001359125 | 0.00784649  |
| ENSG00000103811.11 | CTSH           | 652.826193  | 0.472162166 | 0.147558087 | 3.199839304 | 0.001375042 | 0.007923681 |
| ENSG00000089057.10 | SLC23A2        | 278.8998052 | 0.354258318 | 0.110727448 | 3.199372194 | 0.001377272 | 0.007931184 |
| ENSG00000120526.6  | NUDCD1         | 200.5354697 | 0.33212267  | 0.10380591  | 3.199458186 | 0.001376862 | 0.007931184 |
| ENSG00000171307.14 | ZDHHC16        | 189.9761595 | 0.204373868 | 0.063882301 | 3.199225223 | 0.001377975 | 0.007931184 |
| ENSG00000198900.5  | TOP1           | 512.9723346 | 0.325315384 | 0.101686541 | 3.199198042 | 0.001378105 | 0.007931184 |
| ENSG00000154319.10 | FAM167A        | 32.77121811 | 0.665812142 | 0.208240049 | 3.197329932 | 0.001387062 | 0.007971011 |
| ENSG00000167094.11 | TTC16          | 2.510582267 | 1.501162486 | 0.469643548 | 3.196386902 | 0.001391604 | 0.007993212 |
| ENSG00000110665.7  | C11orf21       | 17.18022623 | 0.882397771 | 0.276111276 | 3.195804909 | 0.001394414 | 0.008007505 |
| ENSG00000174842.12 | GLMN           | 63.25147199 | 0.254275994 | 0.079587603 | 3.194919601 | 0.001398698 | 0.008030256 |
| ENSG00000205413.3  | SAMD9          | 1422.084781 | 0.401299062 | 0.125631562 | 3.194253557 | 0.001401929 | 0.00803954  |
| ENSG00000237493.3  | RP11-603J24.7  | 52.84717671 | 0.332465805 | 0.104078937 | 3.194362046 | 0.001401403 | 0.00803954  |
| ENSG00000078114.14 | NEBL           | 341.0499551 | 0.506668183 | 0.158654372 | 3.193534326 | 0.001405426 | 0.008057734 |
| ENSG00000123989.9  | CHPF           | 272.7211206 | 0.404453161 | 0.126669053 | 3.192991123 | 0.001408073 | 0.008071048 |
| ENSG00000165029.11 | ABCA1          | 1129.96242  | 0.428435876 | 0.134209523 | 3.192291189 | 0.001411149 | 0.00808691  |
| ENSG00000115233.7  | PSMD14         | 406.9359788 | 0.345179917 | 0.108140377 | 3.191961478 | 0.001413102 | 0.008094283 |
| ENSG00000117090.10 | SLAMF1         | 79.04235969 | 0.645900137 | 0.202493741 | 3.189728896 | 0.001424063 | 0.008145825 |
| ENSG00000149403.7  | GRIK4          | 3.361080401 | 0.871842191 | 0.273323475 | 3.189781602 | 0.001423804 | 0.008145825 |
| ENSG00000251408.1  | RP11-586D19.2  | 1.61645809  | 1.298431427 | 0.407092762 | 3.189522263 | 0.001425082 | 0.008149778 |
| ENSG00000166803.6  | KIAA0101       | 84.26722809 | 0.486679225 | 0.152613348 | 3.188968932 | 0.001427812 | 0.008161644 |
| ENSG00000232004.1  | CAP1P2         | 20.58787052 | 0.40381474  | 0.126768655 | 3.185446285 | 0.001445309 | 0.008254079 |
| ENSG00000120318.11 | ARAP3          | 64.75873549 | 0.446431249 | 0.140164111 | 3.18506105  | 0.001447235 | 0.008263179 |
| ENSG00000136280.11 | CCM2           | 221.010057  | 0.322041556 | 0.101213727 | 3.181797223 | 0.001463643 | 0.008343466 |
| ENSG00000157796.13 | WDR19          | 98.25643796 | 0.390256603 | 0.122670744 | 3.18133395  | 0.001465985 | 0.00835457  |
| ENSG00000236603.1  | RANP1          | 132.411421  | 0.295785376 | 0.092994261 | 3.180684198 | 0.001469277 | 0.008367921 |
| ENSG00000115806.8  | GORASP2        | 492.1899744 | 0.267460046 | 0.084104477 | 3.180092848 | 0.001472279 | 0.008379265 |
| ENSG00000137312.10 | FLOT1          | 596.6985314 | 0.199998775 | 0.062915883 | 3.17882805  | 0.001478718 | 0.008412066 |
| ENSG00000213514.2  | RP11-428P16.2  | 5.196641742 | 0.722412766 | 0.22733692  | 3.177718631 | 0.001484387 | 0.008434681 |
| ENSG00000065882.11 | TBC1D1         | 577.3127833 | 0.172381389 | 0.054248265 | 3.17763876  | 0.001484796 | 0.008435079 |
| ENSG00000164330.12 | EBF1           | 71.28454588 | 0.763171243 | 0.240194389 | 3.177306705 | 0.001486497 | 0.008442817 |
| ENSG00000128944.9  | KNSTRN         | 108.2733099 | 0.359778614 | 0.113277807 | 3.176073251 | 0.001492833 | 0.008474931 |
| ENSG00000168658.14 | VWA3B          | 8.961433822 | 0.622795693 | 0.196102588 | 3.175866771 | 0.001493895 | 0.008475167 |
| ENSG00000255521.1  | RP4-60717.1    | 0.600579985 | 1.701078163 | 0.535618831 | 3.175911793 | 0.001493664 | 0.008475167 |
| ENSG00000126453.5  | BCL2L12        | 19.68897983 | 0.596158835 | 0.187726527 | 3.175677104 | 0.001494872 | 0.008476846 |
| ENSG00000033100.10 | CHPF2          | 378.5841481 | 0.301396683 | 0.094917246 | 3.175362694 | 0.001496493 | 0.008480242 |
| ENSG00000138944.7  | KIAA1644       | 63.12799283 | 0.659396316 | 0.207658808 | 3.175383321 | 0.001496387 | 0.008480242 |
| ENSG00000068650.14 | ATP11A         | 284.4387413 | 0.378014552 | 0.119144459 | 3.172737857 | 0.001510088 | 0.008543666 |
| ENSG00000185222.7  | WBP5           | 194.0282568 | 0.386882894 | 0.122075143 | 3.169219253 | 0.00152849  | 0.008634046 |
| ENSG00000111913.11 | FAM65B         | 301.7655093 | 1.045503558 | 0.32990231  | 3.169130757 | 0.001528956 | 0.008634716 |
| ENSG00000170779.10 | CDC4A          | 71.38295332 | 0.284656625 | 0.089850702 | 3.168106857 | 0.001534351 | 0.00866322  |
| ENSG0000011376.5   | LARS2          | 284.5482644 | 0.26111723  | 0.08242491  | 3.167940755 | 0.001535228 | 0.008666206 |
| ENSG00000126787.8  | DLGAP5         | 161.0588391 | 0.523040281 | 0.165167717 | 3.166722233 | 0.001541675 | 0.00869365  |
| ENSG00000150594.5  | ADRA2A         | 108.4255485 | 0.521000674 | 0.164532598 | 3.166549855 | 0.001542589 | 0.00869365  |
| ENSG00000219682.3  | RP3-425P12.4   | 66.59173753 | 0.276104504 | 0.087193881 | 3.166558266 | 0.001542544 | 0.00869365  |
| ENSG00000230154.1  | ACO18463.4     | 9.26329239  | 0.475430185 | 0.150144402 | 3.166494309 | 0.001542884 | 0.00869365  |
| ENSG00000169258.6  | GPRIN1         | 16.19233754 | 0.659250136 | 0.208236294 | 3.16587529  | 0.001546171 | 0.0087102   |
| ENSG00000179978.10 | RP11-1319K7.1  | 16.66917976 | 0.479380752 | 0.151428179 | 3.165730148 | 0.001546942 | 0.008712575 |
| ENSG00000168995.9  | SIGLEC7        | 19.1891939  | 0.584477771 | 0.184644756 | 3.165417665 | 0.001548605 | 0.008719966 |
| ENSG00000109670.9  | FBXW7          | 569.6580585 | 0.282700512 | 0.089334119 | 3.164530124 | 0.001553336 | 0.008738699 |
| ENSG00000183741.7  | CBX6           | 379.4632309 | 0.44878062  | 0.141822707 | 3.164377751 | 0.001554149 | 0.008739326 |
| ENSG00000266835.1  | RP11-838N2.4   | 1.759073112 | 1.226064917 | 0.387491851 | 3.164105034 | 0.001555606 | 0.008745544 |
| ENSG00000234506.1  | RP11-274B18.2  | 0.58870292  | 2.295043324 | 0.725413896 | 3.163770831 | 0.001557394 | 0.008751639 |
| ENSG00000139687.9  | RB1            | 708.6967195 | 0.243409374 | 0.076965637 | 3.162572087 | 0.00156382  | 0.008781804 |
| ENSG00000168502.13 | SOGA2          | 87.61639228 | 0.691749417 | 0.218744787 | 3.162358413 | 0.001564968 | 0.008786269 |
| ENSG00000204103.2  | MAFB           | 116.7426123 | 0.548069783 | 0.17340719  | 3.160594338 | 0.001574476 | 0.008825717 |
| ENSG00000119900.7  | OGFRL1         | 359.2599344 | 0.402197489 | 0.127310261 | 3.159191458 | 0.001582075 | 0.008866317 |
| ENSG00000134046.7  | MBD2           | 513.3623499 | 0.20210881  | 0.063979348 |             |             |             |

## upreg\_DEGs

|                    |               |             |             |             |             |             |             |
|--------------------|---------------|-------------|-------------|-------------|-------------|-------------|-------------|
| ENSG00000175354.14 | PTPN2         | 283.8916981 | 0.210840188 | 0.066911333 | 3.151038524 | 0.00162691  | 0.009065449 |
| ENSG00000196542.4  | SPTSSB        | 8.509389161 | 0.772911993 | 0.245305435 | 3.150814791 | 0.001628157 | 0.009069443 |
| ENSG00000154760.9  | SLFN13        | 109.9685547 | 0.441201703 | 0.140069315 | 3.149881207 | 0.001633369 | 0.009094404 |
| ENSG00000161896.6  | IP6K3         | 4.776010875 | 0.996235631 | 0.316392018 | 3.148738191 | 0.00163977  | 0.009124444 |
| ENSG00000231878.1  | SNRFPF1       | 10.00903451 | 0.527000883 | 0.167435889 | 3.147478637 | 0.001646851 | 0.00915514  |
| ENSG00000248632.1  | RP11-366M4.11 | 3.744589506 | 0.928712347 | 0.295073471 | 3.147393579 | 0.001647331 | 0.00915576  |
| ENSG00000142627.9  | EPHA2         | 295.7130208 | 0.561807185 | 0.178512689 | 3.147155472 | 0.001648673 | 0.009161174 |
| ENSG00000163938.12 | GNL3          | 527.3503676 | 0.30800661  | 0.09787575  | 3.146914423 | 0.001650033 | 0.009163436 |
| ENSG00000180370.6  | PAK2          | 984.7272836 | 0.207201227 | 0.065844315 | 3.146835484 | 0.001650478 | 0.009163436 |
| ENSG00000198833.6  | UBE2J1        | 1559.342782 | 0.283355892 | 0.090061991 | 3.146231707 | 0.001653889 | 0.009177869 |
| ENSG0000028277.16  | POU2F2        | 88.1894089  | 1.02340996  | 0.325351321 | 3.145553419 | 0.001657729 | 0.009190982 |
| ENSG00000006606.4  | CCL26         | 2.293990633 | 1.520453194 | 0.483408896 | 3.14527351  | 0.001659316 | 0.009195685 |
| ENSG00000105374.5  | NKG7          | 45.94091615 | 0.763239576 | 0.242811582 | 3.143340894 | 0.001670312 | 0.009248386 |
| ENSG00000166278.10 | C2            | 280.0266463 | 0.711404215 | 0.226355888 | 3.142857128 | 0.001673075 | 0.009257507 |
| ENSG00000105137.8  | SYDE1         | 44.79376217 | 0.537634606 | 0.171091424 | 3.142381965 | 0.001675793 | 0.009268425 |
| ENSG00000249859.3  | PVT1          | 41.32752819 | 0.637829427 | 0.203048827 | 3.141261327 | 0.001682219 | 0.009298318 |
| ENSG00000132109.8  | TRIM21        | 274.5185134 | 0.344125864 | 0.109559296 | 3.141001064 | 0.001683714 | 0.009303969 |
| ENSG00000246430.2  | LINC00968     | 0.662816993 | 1.959462233 | 0.624257045 | 3.138870839 | 0.001696002 | 0.009365632 |
| ENSG00000165304.3  | MELK          | 123.9852995 | 0.466013513 | 0.148628528 | 3.135424402 | 0.001716057 | 0.009457496 |
| ENSG00000105254.7  | TBCB          | 190.2147208 | 0.201553008 | 0.064298772 | 3.134632334 | 0.001720696 | 0.00947887  |
| ENSG00000101955.10 | SRPX          | 41.79390404 | 0.652958757 | 0.208337007 | 3.134146775 | 0.001723546 | 0.009490369 |
| ENSG00000100077.10 | ADRBK2        | 219.6681789 | 0.543180815 | 0.173352098 | 3.13339626  | 0.00172796  | 0.009508363 |
| ENSG00000200156.1  | RNU5B-1       | 226.1916754 | 0.693814187 | 0.221423205 | 3.133430341 | 0.001727759 | 0.009508363 |
| ENSG00000006530.11 | AGK           | 164.5669054 | 0.20633467  | 0.065895323 | 3.131249103 | 0.001740645 | 0.0095697   |
| ENSG00000181163.9  | NPM1          | 860.066401  | 0.276747098 | 0.088446099 | 3.128991556 | 0.001754074 | 0.009631804 |
| ENSG00000175595.10 | ERCC4         | 149.4205238 | 0.227069554 | 0.072580588 | 3.128516331 | 0.001756913 | 0.009643711 |
| ENSG00000090686.11 | USP48         | 475.5130778 | 0.228849699 | 0.073153804 | 3.128336271 | 0.001757989 | 0.00964376  |
| ENSG00000163661.3  | PTX3          | 8.232533512 | 0.746433654 | 0.238619884 | 3.128128468 | 0.001759233 | 0.009647973 |
| ENSG00000158161.11 | EYA3          | 414.5886728 | 0.170130886 | 0.054403431 | 3.127208777 | 0.001764746 | 0.009670169 |
| ENSG00000260604.1  | RP1-140K8.5   | 0.860595043 | 1.949541023 | 0.623433808 | 3.127101864 | 0.001765388 | 0.009671557 |
| ENSG00000152784.11 | PRDM8         | 21.90205418 | 0.667004605 | 0.213365793 | 3.126108426 | 0.001771362 | 0.00970002  |
| ENSG00000134057.10 | CCNB1         | 254.4889095 | 0.522227435 | 0.167069254 | 3.125814125 | 0.001773136 | 0.009707597 |
| ENSG00000166788.5  | SAAL1         | 78.87627326 | 0.247431345 | 0.079199752 | 3.124142927 | 0.001783238 | 0.009754324 |
| ENSG00000170606.9  | HSPA4         | 1095.845574 | 0.206281477 | 0.066047107 | 3.123247729 | 0.001788671 | 0.009781894 |
| ENSG00000211974.2  | IGHV2-70      | 48.74374761 | 1.380173571 | 0.442026417 | 3.122378029 | 0.001793964 | 0.009806532 |
| ENSG00000229083.1  | PSMA6P2       | 6.553730144 | 0.604083885 | 0.193465667 | 3.12243456  | 0.00179362  | 0.009806532 |
| ENSG00000101298.9  | SNPH          | 37.83472543 | 0.652966059 | 0.209217452 | 3.120992315 | 0.001802427 | 0.009847603 |
| ENSG00000136404.11 | TM6SF1        | 23.13675567 | 0.485463161 | 0.155571018 | 3.120524413 | 0.001805293 | 0.009857638 |
| ENSG00000197780.5  | TAF13         | 220.8038541 | 0.349401253 | 0.111979191 | 3.120233764 | 0.001807076 | 0.009860491 |
| ENSG00000264964.1  | RP11-888D10.3 | 0.462486106 | 2.025166613 | 0.649022987 | 3.120331105 | 0.001806479 | 0.009860491 |
| ENSG00000136770.6  | DNAJC1        | 297.2179799 | 0.238596877 | 0.076484614 | 3.119540862 | 0.001811331 | 0.009877609 |
| ENSG00000161921.10 | CXCL16        | 245.8979936 | 0.402209917 | 0.128930467 | 3.119587846 | 0.001811043 | 0.009877609 |
| ENSG00000164509.9  | IL31RA        | 4.447805385 | 1.361834593 | 0.436653359 | 3.118800225 | 0.00181589  | 0.009900301 |
| ENSG00000174996.7  | KLC2          | 57.04731004 | 0.397651038 | 0.127537849 | 3.117906111 | 0.001821408 | 0.009926037 |
| ENSG00000136147.12 | PHF11         | 186.2627584 | 0.257071806 | 0.08246505  | 3.117342524 | 0.001824894 | 0.009942857 |
| ENSG00000121621.6  | KIF18A        | 86.28704638 | 0.466194737 | 0.149629291 | 3.115664941 | 0.001835307 | 0.009990843 |
| ENSG00000106952.3  | TNFSF8        | 25.74576363 | 0.740544553 | 0.237714843 | 3.115264259 | 0.001837802 | 0.009997867 |
