# Supplementary material for: Uncoupling of mucosal gene regulation, mRNA splicing and adherent microbiota signatures in inflammatory bowel disease
Source: PubMed Central journal article supplement — Gut. 2016 Sep 30;66(12):2087–97. doi: 10.1136/gutjnl-2016-311651 (PMC5749366; doi:10.1136/gutjnl-2016-311651), 2016-09-30
Supplement: gutjnl-2016-311651supp004.pdf [file gutjnl-2016-311651supp004.pdf]

## UPreg\_DRAS

| GENE     | EVENT              | First Cond. Vs Second C | mean_PSI/F | mean_PSI/PIR/PSU | secr dPSI/PIR/PSU | Status       |
|----------|--------------------|-------------------------|------------|------------------|-------------------|--------------|
| ACLY     | HsaEX0001940       | SIGMA vs TILE           | 77.571071  | 60.40103448      | 17.1700369        | Up-regulated |
| APLP2    | HsaEX0005149       | SIGMA vs TILE           | 48.234839  | 34.49375         | 13.7410887        | Up-regulated |
| APRT     | HsaALTA0000575-1/2 | SIGMA vs TILE           | 42.523548  | 31.0453125       | 11.4782359        | Up-regulated |
| CIDEB    | HsaINT0035425      | SIGMA vs TILE           | 69.328966  | 16.595           | 52.7339655        | Up-regulated |
| CYP4F12  | HsaALTD0001778-2/2 | SIGMA vs TILE           | 87.566333  | 75.67290323      | 11.8934301        | Up-regulated |
| DNM2     | HsaEX0020455       | SIGMA vs TILE           | 69.682258  | 56.46166667      | 13.2205914        | Up-regulated |
| ENY2     | HsaALTD0002242-1/3 | SIGMA vs TILE           | 36.478387  | 25.40064516      | 11.0777419        | Up-regulated |
| EPB41    | HsaEX0022618       | SIGMA vs TILE           | 50.411724  | 28.11            | 22.3017241        | Up-regulated |
| EPB41    | HsaEX0022625       | SIGMA vs TILE           | 32.217     | 20.27166667      | 11.9453333        | Up-regulated |
| FLNB     | HsaEX0025938       | SIGMA vs TILE           | 26.502903  | 15.635625        | 10.8672782        | Up-regulated |
| FRYL     | HsaEX0026474       | SIGMA vs TILE           | 91.055806  | 79.97580645      | 11.08             | Up-regulated |
| GPR160   | HsaALTD0002862-1/2 | SIGMA vs TILE           | 78.927419  | 64.7253125       | 14.2021069        | Up-regulated |
| HLA-DMB  | HsaEX0030104       | SIGMA vs TILE           | 79.234667  | 35.6525          | 43.5821667        | Up-regulated |
| MGLL     | HsaEX0039129       | SIGMA vs TILE           | 39.295484  | 18.56206897      | 20.7334149        | Up-regulated |
| NCOA2    | HsaEX0042057       | SIGMA vs TILE           | 80.828621  | 70.55433333      | 10.2742874        | Up-regulated |
| PTPRF    | HsaEX0051138       | SIGMA vs TILE           | 21.917     | 9.721290323      | 12.1957097        | Up-regulated |
| RPS24    | HsaEX0055568       | SIGMA vs TILE           | 65.994839  | 55.560625        | 10.4342137        | Up-regulated |
| SLK      | HsaEX0060174       | SIGMA vs TILE           | 72.071613  | 52.17551724      | 19.8960957        | Up-regulated |
| STXBP5   | HsaEX0062777       | SIGMA vs TILE           | 30.540345  | 16.68068966      | 13.8596552        | Up-regulated |
| TPM1     | HsaEX0066682       | SIGMA vs TILE           | 75.457097  | 45.69266667      | 29.7644301        | Up-regulated |
| UAP1     | HsaEX0068590       | SIGMA vs TILE           | 71.949677  | 39.5290625       | 32.4206149        | Up-regulated |
| UGP2     | HsaEX0069181       | SIGMA vs TILE           | 60.313548  | 15.979           | 44.3345484        | Up-regulated |
| USO1     | HsaEX0069561       | SIGMA vs TILE           | 44.526129  | 20.48548387      | 24.0406452        | Up-regulated |
| AKAP9    | HsaEX0003428       | INF vs NoINF            | 32.988095  | 21.71452381      | 11.2735714        | Up-regulated |
| CCDC68   | HsaEX0013408       | INF vs NoINF            | 96.679     | 85.92575         | 10.75325          | Up-regulated |
| CIDEB    | HsaINT0035423      | INF vs NoINF            | 45.054737  | 30.06184211      | 14.9928947        | Up-regulated |
| CIDEB    | HsaINT0035425      | INF vs NoINF            | 50.242     | 37.48146341      | 12.7605366        | Up-regulated |
| CIDEB    | HsaINT0035426      | INF vs NoINF            | 43.4785    | 32.37358974      | 11.1049103        | Up-regulated |
| MT1G     | HsaALTA0005394-1/2 | INF vs NoINF            | 35.941053  | 25.59            | 10.3510526        | Up-regulated |
| PACSIN2  | HsaEX0045197       | INF vs NoINF            | 83.370476  | 72.2615          | 11.1089762        | Up-regulated |
| PCBP2    | HsaALTA0006106-2/3 | INF vs NoINF            | 75.52      | 64.71404762      | 10.8059524        | Up-regulated |
| PLOD2    | HsaEX0048471       | INF vs NoINF            | 42.117895  | 31.8095          | 10.3083947        | Up-regulated |
| SLC39A14 | HsaEX0059640       | INF vs NoINF            | 48.881905  | 38.20292683      | 10.6789779        | Up-regulated |
| SYK      | HsaEX0063119       | INF vs NoINF            | 56.5545    | 39.43170732      | 17.1227927        | Up-regulated |
| CAST     | HsaEX0012625       | UC vs Ct-Dct            | 63.000588  | 50.74555556      | 12.2550327        | Up-regulated |
| GBP3     | HsaEX0027164       | UC vs Ct-Dct            | 95.460588  | 81.54038462      | 13.9202036        | Up-regulated |
| TMPRSS4  | HsaALTA0008827-2/2 | UC vs Ct-Dct            | 48.929412  | 25.64407407      | 23.2853377        | Up-regulated |
| GBP3     | HsaEX0027164       | CD vs Ct-Dct            | 94.171667  | 81.54038462      | 12.6312821        | Up-regulated |
| HLA-C    | HsaALTA0004015-2/2 | CD vs Ct-Dct            | 16.941053  | 2.176666667      | 14.764386         | Up-regulated |
| PARP4    | HsaINT0120516      | CD vs Ct-Dct            | 20.778333  | 9.553333333      | 11.225            | Up-regulated |
| TMPRSS4  | HsaALTA0008827-2/2 | CD vs Ct-Dct            | 40.383684  | 25.64407407      | 14.7396101        | Up-regulated |
| ABLIM1   | HsaEX0000723       | CdbTILEvsCDnbTILE       | 98.304     | 87.67333333      | 10.6306667        | Up-regulated |
| ACIN1    | HsaALTA0000160-1/2 | CdbTILEvsCDnbTILE       | 25.158     | 12.47333333      | 12.6846667        | Up-regulated |
| AFTPH    | HsaALTA0000272-1/2 | CdbTILEvsCDnbTILE       | 33.778     | 22.00833333      | 11.7696667        | Up-regulated |
| AKAP13   | HsaEX0003375       | CdbTILEvsCDnbTILE       | 29.88      | 13.21833333      | 16.6616667        | Up-regulated |
| AKAP9    | HsaEX0003428       | CdbTILEvsCDnbTILE       | 42.72      | 19.86833333      | 22.8516667        | Up-regulated |
| ANKHD1   | HsaEX0004213       | CdbTILEvsCDnbTILE       | 88.432     | 77.18666667      | 11.2453333        | Up-regulated |
| APP      | HsaEX0005197       | CdbTILEvsCDnbTILE       | 34.322     | 23.48            | 10.842            | Up-regulated |
| ARHGAP5  | HsaALTA0000616-2/2 | CdbTILEvsCDnbTILE       | 82.346     | 71.33666667      | 11.0093333        | Up-regulated |
| ASL      | HsaEX0006287       | CdbTILEvsCDnbTILE       | 93.932     | 82.98            | 10.952            | Up-regulated |
| BACE2    | HsaALTD0000641-2/2 | CdbTILEvsCDnbTILE       | 91.288     | 75.29166667      | 15.9963333        | Up-regulated |
| BCAP31   | HsaALTD0000673-1/2 | CdbTILEvsCDnbTILE       | 96.128     | 81.30666667      | 14.8213333        | Up-regulated |
| BPTF     | HsaEX0008352       | CdbTILEvsCDnbTILE       | 53.44      | 38.03166667      | 15.4083333        | Up-regulated |
| CIDEB    | HsaINT0035425      | CdbTILEvsCDnbTILE       | 27.722     | 12.36            | 15.362            | Up-regulated |
| CIDEB    | HsaINT0035426      | CdbTILEvsCDnbTILE       | 22.488     | 10.70666667      | 11.7813333        | Up-regulated |
| COL6A3   | HsaEX0016637       | CdbTILEvsCDnbTILE       | 22.098     | 9.388333333      | 12.7096667        | Up-regulated |
| CTDSP1   | HsaALTA0002230-2/2 | CdbTILEvsCDnbTILE       | 50.398     | 39.63666667      | 10.7613333        | Up-regulated |
| CTTN     | HsaEX0017945       | CdbTILEvsCDnbTILE       | 68.138     | 53.56833333      | 14.5696667        | Up-regulated |
| DAZAP1   | HsaEX0018546       | CdbTILEvsCDnbTILE       | 89.732     | 77.81166667      | 11.9203333        | Up-regulated |
| DCAF11   | HsaALTA0002350-2/2 | CdbTILEvsCDnbTILE       | 92.546     | 82.14333333      | 10.4026667        | Up-regulated |
| DNM2     | HsaALTA0002577-1/2 | CdbTILEvsCDnbTILE       | 30.682     | 16.22333333      | 14.4586667        | Up-regulated |
| EPB41    | HsaEX0022618       | CdbTILEvsCDnbTILE       | 32.424     | 21.815           | 10.609            | Up-regulated |
| FAM160A2 | HsaALTD0002401-2/2 | CdbTILEvsCDnbTILE       | 26.198     | 10.78666667      | 15.4113333        | Up-regulated |
| HLA-DMB  | HsaEX0030104       | CdbTILEvsCDnbTILE       | 53.526     | 23.625           | 29.901            | Up-regulated |
| HNRNPH1  | HsaALTD0003092-1/3 | CdbTILEvsCDnbTILE       | 59.966     | 47.76166667      | 12.2043333        | Up-regulated |
| LRRFIP2  | HsaEX0036752       | CdbTILEvsCDnbTILE       | 22.458     | 9.901666667      | 12.5563333        | Up-regulated |
| MACF1    | HsaEX0037171       | CdbTILEvsCDnbTILE       | 61.486     | 46.27833333      | 15.2076667        | Up-regulated |
| MACF1    | HsaEX0037173       | CdbTILEvsCDnbTILE       | 58.194     | 47.64333333      | 10.5506667        | Up-regulated |
| MACF1    | HsaEX0037174       | CdbTILEvsCDnbTILE       | 56.466     | 41.82666667      | 14.6393333        | Up-regulated |
| MBNL1    | HsaEX0038106       | CdbTILEvsCDnbTILE       | 75.758     | 61.09666667      | 14.6613333        | Up-regulated |
| MIER3    | HsaALTA0005207-1/2 | CdbTILEvsCDnbTILE       | 33.574     | 19.57666667      | 13.9973333        | Up-regulated |
| MT1G     | HsaALTA0005394-1/2 | CdbTILEvsCDnbTILE       | 34.062     | 17.48            | 16.582            | Up-regulated |
| NCOA2    | HsaEX0042057       | CdbTILEvsCDnbTILE       | 83.64      | 59.45833333      | 24.1816667        | Up-regulated |
| OSBPL8   | HsaALTA0005982-2/2 | CdbTILEvsCDnbTILE       | 72.862     | 62.75166667      | 10.1103333        | Up-regulated |
| PACSIN2  | HsaEX0045197       | CdbTILEvsCDnbTILE       | 87.572     | 70.15833333      | 17.4136667        | Up-regulated |
| PCBP2    | HsaEX0045776       | CdbTILEvsCDnbTILE       | 88.434     | 77.27166667      | 11.1623333        | Up-regulated |
| PCNP     | HsaALTA0006126-2/3 | CdbTILEvsCDnbTILE       | 67.328     | 54.01333333      | 13.3146667        | Up-regulated |

## UPreg\_DRAS

|          |                    |                   |         |             |            |              |
|----------|--------------------|-------------------|---------|-------------|------------|--------------|
| PEX19    | HsaEX0046648       | CdbTILEvsCDnbTILE | 90.17   | 79.12333333 | 11.0466667 | Up-regulated |
| PTBP1    | HsaEX0050725       | CdbTILEvsCDnbTILE | 74.4    | 62.28166667 | 12.1183333 | Up-regulated |
| REPIN1   | HsaALTA0007104-2/3 | CdbTILEvsCDnbTILE | 90.854  | 80.65333333 | 10.2006667 | Up-regulated |
| SPINT1   | HsaALTD0006179-1/2 | CdbTILEvsCDnbTILE | 73.902  | 59.31166667 | 14.5903333 | Up-regulated |
| SSFA2    | HsaALTD0006216-2/2 | CdbTILEvsCDnbTILE | 84.766  | 73.07666667 | 11.6893333 | Up-regulated |
| STUB1    | HsaINT0161252      | CdbTILEvsCDnbTILE | 54.354  | 43.53666667 | 10.8173333 | Up-regulated |
| SYK      | HsaEX0063119       | CdbTILEvsCDnbTILE | 60.998  | 30.27833333 | 30.7196667 | Up-regulated |
| SYNE2    | HsaEX0063188       | CdbTILEvsCDnbTILE | 20.42   | 10.02666667 | 10.3933333 | Up-regulated |
| TMEM106C | HsaALTD0006585-1/2 | CdbTILEvsCDnbTILE | 81.584  | 63.23666667 | 18.3473333 | Up-regulated |
| TMPRSS4  | HsaALTA0008827-2/2 | CdbTILEvsCDnbTILE | 43.7    | 31.07333333 | 12.6266667 | Up-regulated |
| TPM1     | HsaEX0066682       | CdbTILEvsCDnbTILE | 46.246  | 35.355      | 10.891     | Up-regulated |
| UAP1     | HsaEX0068590       | CdbTILEvsCDnbTILE | 48.416  | 36.12166667 | 12.2943333 | Up-regulated |
| VPS13D   | HsaALTA0009424-1/2 | CdbTILEvsCDnbTILE | 81.264  | 61.50166667 | 19.7623333 | Up-regulated |
| WIPI2    | HsaALTD0007227-1/3 | CdbTILEvsCDnbTILE | 49.572  | 35.24333333 | 14.3286667 | Up-regulated |
| ZC3H14   | HsaALTA0009631-2/2 | CdbTILEvsCDnbTILE | 65.902  | 54.68166667 | 11.2203333 | Up-regulated |
| ABCE1    | HsaALTA0000053-1/2 | UcbSIGvsUCnbSIG   | 13.315  | 2.202       | 11.113     | Up-regulated |
| AKAP9    | HsaEX0003428       | UcbSIGvsUCnbSIG   | 30.8075 | 18.492      | 12.3155    | Up-regulated |
| ARFRP1   | HsaINT0011199      | UcbSIGvsUCnbSIG   | 15.59   | 1.068       | 14.522     | Up-regulated |
| ARHGEF2  | HsaALTA0000630-2/2 | UcbSIGvsUCnbSIG   | 73.0725 | 59.572      | 13.5005    | Up-regulated |
| ASRGL1   | HsaEX0006364       | UcbSIGvsUCnbSIG   | 91.9075 | 79.556      | 12.3515    | Up-regulated |
| BCL2L1   | HsaALTA0000926-1/2 | UcbSIGvsUCnbSIG   | 47.845  | 37.412      | 10.433     | Up-regulated |
| CASP8    | HsaEX0012593       | UcbSIGvsUCnbSIG   | 87.4125 | 75.37       | 12.0425    | Up-regulated |
| CCNL1    | HsaEX0013664       | UcbSIGvsUCnbSIG   | 51.6725 | 39.866      | 11.8065    | Up-regulated |
| CD44     | HsaEX0013860       | UcbSIGvsUCnbSIG   | 60.635  | 50.226      | 10.409     | Up-regulated |
| CD44     | HsaEX0013868       | UcbSIGvsUCnbSIG   | 20.3975 | 10.192      | 10.2055    | Up-regulated |
| CNIH4    | HsaEX0015932       | UcbSIGvsUCnbSIG   | 94.5925 | 82.784      | 11.8085    | Up-regulated |
| COPS2    | HsaALTA0002079-2/2 | UcbSIGvsUCnbSIG   | 47.895  | 35.926      | 11.969     | Up-regulated |
| CORO1C   | HsaEX0016862       | UcbSIGvsUCnbSIG   | 21.2525 | 11.104      | 10.1485    | Up-regulated |
| DAP3     | HsaALTD0001799-2/2 | UcbSIGvsUCnbSIG   | 38.115  | 22.522      | 15.593     | Up-regulated |
| EIF3B    | HsaALTA0002813-2/2 | UcbSIGvsUCnbSIG   | 58.36   | 45.216      | 13.144     | Up-regulated |
| ENOPH1   | HsaALTD0002229-1/2 | UcbSIGvsUCnbSIG   | 31.9275 | 12.402      | 19.5255    | Up-regulated |
| ENOSF1   | HsaEX0022477       | UcbSIGvsUCnbSIG   | 93.3275 | 80.508      | 12.8195    | Up-regulated |
| ENOSF1   | HsaEX0022478       | UcbSIGvsUCnbSIG   | 92.42   | 80.148      | 12.272     | Up-regulated |
| ENOSF1   | HsaEX0022479       | UcbSIGvsUCnbSIG   | 95.7325 | 82.056      | 13.6765    | Up-regulated |
| EPS8L3   | HsaEX0022896       | UcbSIGvsUCnbSIG   | 93.61   | 81.222      | 12.388     | Up-regulated |
| EXOSC8   | HsaINT0058855      | UcbSIGvsUCnbSIG   | 18.8575 | 7.098       | 11.7595    | Up-regulated |
| GBF1     | HsaINT0068051      | UcbSIGvsUCnbSIG   | 30.15   | 12.366      | 17.784     | Up-regulated |
| GPR160   | HsaALTD0002862-1/2 | UcbSIGvsUCnbSIG   | 85.2725 | 75.048      | 10.2245    | Up-regulated |
| GRHPR    | HsaALTD0002884-2/3 | UcbSIGvsUCnbSIG   | 27.65   | 12.692      | 14.958     | Up-regulated |
| H2AFY    | HsaEX0029172       | UcbSIGvsUCnbSIG   | 78.49   | 68.16       | 10.33      | Up-regulated |
| HMGCS1   | HsaEX0030208       | UcbSIGvsUCnbSIG   | 71.2325 | 58.196      | 13.0365    | Up-regulated |
| KCTD20   | HsaEX0033177       | UcbSIGvsUCnbSIG   | 93.88   | 82.502      | 11.378     | Up-regulated |
| KIAA1109 | HsaALTD0003451-1/2 | UcbSIGvsUCnbSIG   | 80.165  | 66.094      | 14.071     | Up-regulated |
| KITLG    | HsaEX0034675       | UcbSIGvsUCnbSIG   | 84.2475 | 72.806      | 11.4415    | Up-regulated |
| MACF1    | HsaEX0037170       | UcbSIGvsUCnbSIG   | 54.155  | 42.63       | 11.525     | Up-regulated |
| MACF1    | HsaEX0037171       | UcbSIGvsUCnbSIG   | 57.71   | 43.254      | 14.456     | Up-regulated |
| MACF1    | HsaEX0037172       | UcbSIGvsUCnbSIG   | 54.2225 | 41.906      | 12.3165    | Up-regulated |
| MED13L   | HsaEX0038571       | UcbSIGvsUCnbSIG   | 20.785  | 9.636       | 11.149     | Up-regulated |
| MEF2C    | HsaALTA0005120-1/2 | UcbSIGvsUCnbSIG   | 57.455  | 44.864      | 12.591     | Up-regulated |
| MRPL11   | HsaALTD0004005-2/2 | UcbSIGvsUCnbSIG   | 92.2075 | 81.236      | 10.9715    | Up-regulated |
| PABPC4   | HsaALTD0004542-1/2 | UcbSIGvsUCnbSIG   | 92.4225 | 81.648      | 10.7745    | Up-regulated |
| PCGF5    | HsaEX0045879       | UcbSIGvsUCnbSIG   | 73.725  | 62.888      | 10.837     | Up-regulated |
| PCNP     | HsaALTA0006126-1/3 | UcbSIGvsUCnbSIG   | 47.545  | 36.454      | 11.091     | Up-regulated |
| PIP5K1B  | HsaINT0125389      | UcbSIGvsUCnbSIG   | 18.1175 | 7.75        | 10.3675    | Up-regulated |
| PPP1R12C | HsaALTA0006603-1/2 | UcbSIGvsUCnbSIG   | 51.505  | 41.158      | 10.347     | Up-regulated |
| RHPN2    | HsaINT0140597      | UcbSIGvsUCnbSIG   | 25.0275 | 8.452       | 16.5755    | Up-regulated |
| RNASEK   | HsaALTD0005428-2/2 | UcbSIGvsUCnbSIG   | 91.0125 | 79.824      | 11.1885    | Up-regulated |
| RNF13    | HsaALTD0005436-2/2 | UcbSIGvsUCnbSIG   | 23.515  | 10.278      | 13.237     | Up-regulated |
| RNPC3    | HsaALTA0007252-2/2 | UcbSIGvsUCnbSIG   | 76.1    | 63.27       | 12.83      | Up-regulated |
| RPLP0    | HsaALTA0007347-2/2 | UcbSIGvsUCnbSIG   | 84.4675 | 66.84       | 17.6275    | Up-regulated |
| RPS24    | HsaALTA0007381-1/2 | UcbSIGvsUCnbSIG   | 57.0275 | 37.314      | 19.7135    | Up-regulated |
| SERPINA1 | HsaALTA0007647-1/2 | UcbSIGvsUCnbSIG   | 41.5825 | 28.952      | 12.6305    | Up-regulated |
| SIRT5    | HsaEX0058448       | UcbSIGvsUCnbSIG   | 97.295  | 87.156      | 10.139     | Up-regulated |
| SLC25A39 | HsaALTA0007888-1/2 | UcbSIGvsUCnbSIG   | 89.1125 | 77.632      | 11.4805    | Up-regulated |
| SLC39A14 | HsaEX0059640       | UcbSIGvsUCnbSIG   | 51.525  | 36.03       | 15.495     | Up-regulated |
| TMEM106C | HsaALTD0006585-2/2 | UcbSIGvsUCnbSIG   | 31.7125 | 20.444      | 11.2685    | Up-regulated |
| TMPO     | HsaEX0066064       | UcbSIGvsUCnbSIG   | 79.855  | 69.736      | 10.119     | Up-regulated |
| TMPRSS4  | HsaALTA0008827-2/2 | UcbSIGvsUCnbSIG   | 48.4    | 31.53       | 16.87      | Up-regulated |
| UGT8     | HsaEX0069198       | UcbSIGvsUCnbSIG   | 21.82   | 11.332      | 10.488     | Up-regulated |
| VTI1A    | HsaEX0070740       | UcbSIGvsUCnbSIG   | 11.315  | 0.8         | 10.515     | Up-regulated |
