# Supplementary material for: Uncoupling of mucosal gene regulation, mRNA splicing and adherent microbiota signatures in inflammatory bowel disease
Source: PubMed Central journal article supplement — Gut. 2016 Sep 30;66(12):2087–97. doi: 10.1136/gutjnl-2016-311651 (PMC5749366; doi:10.1136/gutjnl-2016-311651), 2016-09-30
Supplement: gutjnl-2016-311651supp005.pdf [file gutjnl-2016-311651supp005.pdf]

| SampleID | C1648_DCtrlh-iTILE | C1649_DCtrlh-iSIG | C1650_UCn-iTILE | C1653_UCn-iTILE | C1655_Ctrlh-iTILE | C1656_Ctrlh-iSIG | C1658_UCSIG | C1672_CDn-iTILE | C1492_CDISIG | C1659_Ctrlh-iTILE | C1660_UCn-iTILE | C1661_UCSIG | C1662_Ctrlh-iTILE | C1663_Ctrlh-iSIG | C1493_DCtrlSIG | C1664_DCtrlh-iTILE | C1665_UCITILE | C1668_DCtrlSIG | C1669_CDn-iTILE | C1670_CDn-iSIG | C1671_CDIITILE | C1673_CDn-iSIG | C1674_CDn-iTILE | C1675_CDISIG | C1676_DCtrlh-iSIG | C1677_DCtrlITILE | C1678_UCn-iTILE | C1494_UCn-iSIG | C1679_Ctrlh-iTILE | C1680_Ctrlh-iSIG | C1681_DCtrlh-iTILE | C1682_DCtrlSIG | C1683_Ctrlh-iTILE | C1684_Ctrlh-iSIG | C1686_CDn-iTILE | C2484_UCn-iTILE | C2485_UCSIG | D0742_CDISIG | D0743_CDISIG | D0745_CDn-iSIG | D0746_CDn-iSIG | D0748_DCtrlSIG | D0749_DCtrlh-iSIG | D0751_UCn-iSIG | D0752_UCn-iSIG | D0754_UCn-iSIG | D0757_CDIITILE | D0758_CDIITILE | D0759_CDn-iTILE | D0760_CDn-iTILE | D0761_Ctrlh-iTILE | D0762_DCtrlITILE | D0763_DCtrlh-iTILE | D0764_DCtrlh-iTILE | D0765_UCITILE | D0768_Ctrlh-iSIG | D0769_DCtrlh-iSIG | C1664_DCtrlh-iTILE | D0756_CDIITILE |    |
|----------|--------------------|-------------------|-----------------|-----------------|-------------------|------------------|-------------|-----------------|--------------|-------------------|-----------------|-------------|-------------------|------------------|----------------|--------------------|---------------|----------------|-----------------|----------------|----------------|----------------|-----------------|--------------|-------------------|------------------|-----------------|----------------|-------------------|------------------|--------------------|----------------|-------------------|------------------|-----------------|-----------------|-------------|--------------|--------------|----------------|----------------|----------------|-------------------|----------------|----------------|----------------|----------------|----------------|-----------------|-----------------|-------------------|------------------|--------------------|--------------------|---------------|------------------|-------------------|--------------------|----------------|----|
| Otu00001 | 247                | 147               | 239             | 353             | 181               | 248              | 65          | 16              | 83           | 51                | 101             | 143         | 0                 | 0                | 0              | 94                 | 77            | 0              | 1               | 71             | 4              | 7              | 15              | 123          | 383               | 395              | 244             | 213            | 2                 | 0                | 529                | 400            | 206               | 235              | 0               | 134             | 112         | 0            | 229          | 1              | 25             | 93             | 160               | 181            | 444            | 62             | 1              | 212            | 62              | 169             | 32                | 84               | 24                 | 108                | 38            | 0                | 166               | 28                 | 83             |    |
| Otu00002 | 88                 | 80                | 86              | 248             | 138               | 171              | 332         | 4               | 26           | 150               | 77              | 108         | 151               | 246              | 4              | 210                | 195           | 126            | 3               | 1              | 255            | 206            | 280             | 71           | 70                | 143              | 207             | 180            | 81                | 67               | 1                  | 1              | 119               | 105              | 0               | 149             | 188         | 0            | 200          | 2              | 89             | 35             | 123               | 0              | 149            | 0              | 135            | 129            | 172             | 100             | 302               | 58               | 203                | 233                | 169           | 320              | 4                 | 28                 | 57             |    |
| Otu00003 | 0                  | 0                 | 30              | 0               | 0                 | 0                | 20          | 0               | 19           | 55                | 7               | 4           | 0                 | 0                | 769            | 12                 | 16            | 135            | 215             | 272            | 1              | 0              | 188             | 110          | 0                 | 0                | 1               | 0              | 2                 | 5                | 192                | 131            | 9                 | 21               | 167             | 40              | 107         | 423          | 0            | 0              | 8              | 308            | 0                 | 0              | 21             | 68             | 818            | 4              | 0               | 1               | 120               | 205              | 0                  | 0                  | 15            | 0                | 81                | 9                  | 63             |    |
| Otu00004 | 76                 | 50                | 13              | 191             | 215               | 132              | 17          | 2               | 16           | 53                | 53              | 47          | 183               | 223              | 3              | 46                 | 34            | 11             | 34              | 64             | 63             | 53             | 14              | 51           | 69                | 94               | 87              | 70             | 11                | 10               | 0                  | 2              | 93                | 123              | 20              | 80              | 38          | 0            | 33           | 1              | 53             | 5              | 47                | 49             | 63             | 13             | 9              | 46             | 48              | 68              | 10                | 1                | 152                | 99                 | 129           | 22               | 82                | 11                 | 20             |    |
| Otu00005 | 101                | 152               | 0               | 4               | 6                 | 8                | 0           | 1               | 6            | 30                | 54              | 25          | 0                 | 0                | 0              | 0                  | 0             | 0              | 375             | 216            | 1              | 1              | 7               | 271          | 49                | 64               | 59              | 49             | 1                 | 1                | 0                  | 0              | 12                | 16               | 0               | 25              | 42          | 0            | 21           | 0              | 0              | 0              | 4                 | 0              | 64             | 0              | 0              | 3              | 0               | 71              | 2                 | 0                | 0                  | 4                  | 18            | 0                | 160               | 1                  | 9              |    |
| Otu00006 | 18                 | 33                | 3               | 84              | 45                | 43               | 19          | 0               | 4            | 5                 | 39              | 54          | 54                | 64               | 1              | 13                 | 11            | 49             | 0               | 0              | 33             | 41             | 18              | 18           | 1                 | 0                | 24              | 29             | 79                | 96               | 1                  | 1              | 37                | 44               | 0               | 15              | 13          | 0            | 7            | 0              | 52             | 1              | 4                 | 0              | 20             | 64             | 12             | 23             | 42              | 0               | 8                 | 2                | 12                 | 2                  | 14            | 6                | 0                 | 5                  | 13             |    |
| Otu00007 | 34                 | 32                | 8               | 4               | 9                 | 2                | 1           | 470             | 41           | 7                 | 28              | 21          | 109               | 49               | 29             | 1                  | 0             | 0              | 32              | 3              | 0              | 0              | 1               | 27           | 9                 | 10               | 21              | 28             | 72                | 36               | 23                 | 2              | 1                 | 0                | 0               | 96              | 73          | 24           | 7            | 0              | 7              | 13             | 2                 | 5              | 8              | 432            | 10             | 0              | 0               | 47              | 4                 | 29               | 18                 | 2                  | 53            | 1                | 6                 | 177                | 2              |    |
| Otu00008 | 22                 | 24                | 0               | 6               | 13                | 5                | 4           | 4               | 34           | 176               | 9               | 12          | 76                | 68               | 0              | 0                  | 0             | 0              | 9               | 16             | 2              | 3              | 1               | 27           | 76                | 92               | 9               | 14             | 0                 | 0                | 0                  | 3              | 179               | 156              | 8               | 36              | 23          | 0            | 1            | 0              | 3              | 0              | 0                 | 5              | 9              | 1              | 0              | 3              | 4               | 30              | 3                 | 0                | 30                 | 0                  | 22            | 0                | 3                 | 5                  | 5              |    |
| Otu00009 | 0                  | 0                 | 8               | 2               | 32                | 45               | 3           | 0               | 6            | 1                 | 2               | 2           | 22                | 42               | 17             | 13                 | 7             | 149            | 2               | 17             | 69             | 86             | 14              | 1            | 2                 | 1                | 1               | 0              | 118               | 89               | 17                 | 25             | 0                 | 0                | 97              | 4               | 7           | 0            | 0            | 0              | 2              | 12             | 5                 | 1              | 0              | 16             | 0              | 1              | 5               | 3               | 23                | 8                | 38                 | 2                  | 19            | 11               | 4                 | 9                  | 0              |    |
| Otu00010 | 6                  | 20                | 7               | 20              | 0                 | 0                | 0           | 1               | 2            | 54                | 63              | 51          | 28                | 36               | 0              | 4                  | 6             | 0              | 0               | 0              | 31             | 22             | 6               | 0            | 16                | 13               | 5               | 22             | 0                 | 0                | 0                  | 0              | 3                 | 0                | 0               | 23              | 14          | 0            | 6            | 0              | 60             | 0              | 3                 | 19             | 26             | 1              | 0              | 10             | 120             | 88              | 9                 | 0                | 0                  | 16                 | 1             | 0                | 12                | 2                  | 4              |    |
| Otu00011 | 0                  | 0                 | 76              | 0               | 0                 | 0                | 1           | 0               | 18           | 0                 | 0               | 0           | 34                | 55               | 13             | 0                  | 0             | 0              | 0               | 0              | 1              | 169            | 97              | 0            | 0                 | 0                | 0               | 0              | 0                 | 79               | 97                 | 0              | 1                 | 80               | 1               | 7               | 0           | 1            | 0            | 0              | 13             | 2              | 0                 | 4              | 37             | 42             | 0              | 0              | 3               | 125             | 29                | 92               | 6                  | 56                 | 224           | 17               | 0                 | 5                  |                |    |
| Otu00012 | 0                  | 0                 | 2               | 0               | 0                 | 0                | 14          | 0               | 32           | 11                | 48              | 20          | 0                 | 0                | 0              | 0                  | 0             | 0              | 0               | 1              | 10             | 2              | 408             | 129          | 0                 | 0                | 0               | 0              | 0                 | 42               | 13                 | 1              | 0                 | 0                | 0               | 65              | 121         | 0            | 0            | 0              | 17             | 0              | 0                 | 25             | 0              | 0              | 1              | 23             | 9               | 45              | 19                | 0                | 52                 | 23                 | 121           | 3                | 10                |                    |                |    |
| Otu00013 | 52                 | 48                | 37              | 36              | 0                 | 0                | 0           | 3               | 0            | 46                | 113             | 65          | 0                 | 0                | 0              | 4                  | 3             | 0              | 0               | 0              | 5              | 6              | 1               | 26           | 6                 | 5                | 21              | 32             | 0                 | 0                | 0                  | 0              | 2                 | 0                | 0               | 0               | 0           | 0            | 6            | 0              | 0              | 1              | 41                | 0              | 7              | 0              | 0              | 191            | 0               | 32              | 9                 | 0                | 0                  | 102                | 1             | 0                | 23                | 6                  | 1              |    |
| Otu00014 | 2                  | 3                 | 9               | 4               | 9                 | 7                | 60          | 0               | 1            | 5                 | 45              | 40          | 53                | 58               | 0              | 23                 | 21            | 28             | 16              | 7              | 16             | 9              | 3               | 0            | 0                 | 0                | 11              | 9              | 66                | 87               | 0                  | 1              | 14                | 13               | 0               | 0               | 0           | 0            | 0            | 0              | 0              | 20             | 0                 | 0              | 2              | 17             | 154            | 0              | 4               | 25              | 0                 | 2                | 0                  | 19                 | 0             | 22               | 1                 | 87                 | 1              | 1  |
| Otu00015 | 0                  | 0                 | 21              | 5               | 30                | 42               | 0           | 0               | 11           | 4                 | 7               | 12          | 11                | 16               | 0              | 17                 | 24            | 5              | 8               | 17             | 16             | 17             | 5               | 19           | 2                 | 1                | 2               | 0              | 13                | 22               | 84                 | 88             | 0                 | 0                | 90              | 5               | 10          | 0            | 5            | 0              | 25             | 37             | 77                | 0              | 6              | 24             | 0              | 0              | 23              | 8               | 3                 | 7                | 24                 | 21                 | 19            | 11               | 6                 | 1                  | 4              |    |
| Otu00016 | 0                  | 0                 | 27              | 0               | 164               | 155              | 127         | 0               | 3            | 69                | 0               | 0           | 1                 | 0                | 0              | 0                  | 0             | 0              | 1               | 0              | 0              | 0              | 0               | 0            | 0                 | 0                | 0               | 0              | 0                 | 0                | 0                  | 0              | 51                | 47               | 0               | 0               | 0           | 0            | 0            | 0              | 0              | 0              | 0                 | 0              | 0              | 0              | 0              | 0              | 0               | 0               | 0                 | 1                | 0                  | 0                  | 0             | 0                | 1                 | 1                  |                |    |
| Otu00017 | 44                 | 57                | 6               | 11              | 1                 | 0                | 0           | 1               | 10           | 207               | 11              | 9           | 2                 | 2                | 14             | 1                  | 1             | 0              | 4               | 0              | 0              | 0              | 0               | 1            | 2                 | 0                | 0               | 0              | 5                 | 2                | 7                  | 35             | 2                 | 2                | 1               | 17              | 19          | 0            | 2            | 0              | 7              | 11             | 12                | 0              | 3              | 0              | 0              | 4              | 15              | 8               | 151               | 18               | 0                  | 1                  | 1             | 197              | 3                 | 3                  | 1              |    |
| Otu00018 | 4                  | 1                 | 3               | 3               | 0                 | 0                | 10          | 0               | 1            | 21                | 5               | 7           | 1                 | 0                | 0              | 15                 | 8             | 0              | 1               | 0              | 8              | 8              | 2               | 8            | 15                | 6                | 24              | 22             | 0                 | 0                | 0                  | 0              | 19                | 20               | 0               | 56              | 62          | 0            | 33           | 0              | 10             | 5              | 38                | 2              | 57             | 0              | 0              | 9              | 51              | 6               | 29                | 1                | 0                  | 72                 | 1             | 44               | 72                | 1                  | 0              |    |
| Otu00019 | 0                  | 0                 | 4               | 0               | 0                 | 0                | 0           | 0               | 2            | 1                 | 0               | 0           | 0                 | 0                | 0              | 3                  | 0             | 0              | 0               | 0              | 1              | 0              | 0               | 0            | 0                 | 0                | 0               | 0              | 0                 | 0                | 7                  | 9              | 0                 | 0                | 0               | 0               | 0           | 0            | 588          | 1              | 19             | 0              | 0                 | 0              | 0              | 0              | 0              | 94             | 0               | 0               | 2                 | 13               | 0                  | 0                  | 0             | 0                | 14                | 0                  | 7              | 0  |
| Otu00020 | 58                 | 43                | 2               | 3               | 0                 | 0                | 0           | 4               | 1            | 62                | 35              | 38          | 39                | 21               | 0              | 1                  | 0             | 0              | 6               | 7              | 1              | 1              | 0               | 2            | 29                | 33               | 1               | 1              | 0                 | 0                | 0                  | 4              | 6                 | 1                | 5               | 6               | 0           | 2            | 0            | 4              | 0              | 0              | 2                 | 11             | 3              | 0              | 21             | 0              | 139             | 6               | 0                 | 0                | 0                  | 2                  | 7             | 8                | 3                 | 2                  |                |    |
| Otu00021 | 0                  | 0                 | 1               | 0               | 0                 | 0                | 0           | 0               | 1            | 0                 | 0               | 0           | 0                 | 0                | 0              | 90                 | 80            | 0              | 99              | 96             | 0              | 0              | 0               | 0            | 0                 | 0                | 0               | 18             | 19                | 0                | 0                  | 0              | 0                 | 0                | 0               | 0               | 0           | 0            | 0            | 0              | 43             | 0              | 0                 | 0              | 1              | 0              | 0              | 2              | 114             | 0               | 0                 | 0                | 1                  | 30                 | 2             | 46               | 3                 | 0                  | 0              | 3  |
| Otu00022 | 3                  | 6                 | 2               | 3               | 3                 | 1                | 0           | 0               | 54           | 5                 | 17              | 14          | 0                 | 0                | 0              | 23                 | 12            | 0              | 18              | 41             | 34             | 24             | 3               | 10           | 7                 | 3                | 18              | 19             | 0                 | 0                | 1                  | 10             | 7                 | 45               | 28              | 26              | 0           | 0            | 0            | 2              | 3              | 0              | 0                 | 14             | 0              | 0              | 2              | 36             | 1               | 2               | 17                | 127              | 3                  | 57                 | 8             | 9                | 1                 | 2                  |                |    |
| Otu00023 | 0                  | 0                 | 15              | 0               | 38                | 34               | 0           | 0               | 3            | 0                 | 61              | 84          | 0                 | 0                | 1              | 0                  | 0             | 4              | 1               | 0              | 61             | 47             | 6               | 0            | 0                 | 0                | 25              | 20             | 38                | 30               | 0                  | 1              | 21                | 25               | 0               | 16              | 21          | 0            | 0            | 0              | 0              | 0              | 0                 | 0              | 0              | 0              | 0              | 0              | 0               | 0               | 0                 | 0                | 0                  | 0                  | 0             | 0                | 0                 | 0                  | 0              | 4  |
| Otu00024 | 3                  | 1                 | 5               | 7               | 0                 | 0                | 0           | 0               | 1            | 13                | 5               | 15          | 56                | 24               | 0              | 8                  | 8             | 0              | 10              | 8              | 7              | 8              | 0               | 8            | 18                | 23               | 31              | 18             | 26                | 9                | 0                  | 2              | 18                | 15               | 0               | 44              | 27          | 0            | 12           | 0              | 16             | 0              | 6                 | 5              | 9              | 0              | 0              | 33             | 50              | 15              | 2                 | 0                | 21                 | 3                  | 11            | 5                | 12                | 10                 | 1              |    |
| Otu00025 | 0                  | 0                 | 1               | 0               | 0                 | 0                | 0           | 0               | 0            | 0                 | 0               | 0           | 0                 | 0                | 0              | 0                  | 0             | 0              | 0               | 0              | 0              | 0              | 0               | 0            | 0                 | 0                | 0               | 0              | 0                 | 0                | 0                  | 0              | 0                 | 0                | 0               | 0               | 0           | 0            | 0            | 0              | 0              | 0              | 0                 | 0              | 0              | 0              | 0              | 0              | 0               | 0               | 0                 | 0                | 0                  | 0                  | 0             | 0                | 0                 | 0                  | 0              | 2  |
| Otu00026 | 4                  | 3                 | 1               | 3               | 1                 | 2                | 20          | 0               | 1            | 2                 | 15              | 33          | 19                | 12               | 0              | 7                  | 4             | 0              | 0               | 1              | 0              | 0              | 0               | 8            | 13                | 7                | 13              | 12             | 21                | 48               | 3                  | 3              | 5                 | 34               | 9               | 6               | 1           | 9            | 0            | 13             | 1              | 0              | 20                | 10             | 60             | 0              | 10             | 38             | 9               | 3               | 0                 | 22               | 2                  | 12                 | 3             | 32               | 1                 | 1                  |                |    |
| Otu00027 | 63                 | 62                | 4               | 3               | 0                 | 0                | 0           | 2               | 13           | 1                 | 8               | 12          | 0                 | 0                | 0              | 0                  | 0             | 0              | 2               | 2              | 4              | 6              | 0               | 0            | 8                 | 3                | 6               | 17             | 93                | 72               | 0                  | 0              | 0                 | 0                | 4               | 10              | 9           | 0            | 1            | 0              | 2              | 0              | 2                 | 13             | 19             | 9              | 0              | 3              | 0               | 41              | 1                 | 0                | 0                  | 2                  | 3             | 0                | 1                 | 0                  | 1              |    |
| Otu00028 | 9                  | 9                 | 6               | 2               | 0                 | 0                | 7           | 1               | 0            | 8                 | 8               | 3           | 0                 | 0                | 0              | 35                 | 26            | 0              | 0               | 0              | 36             | 31             | 5               | 23           | 4                 | 7                | 9               | 7              | 13                | 17               | 0                  | 0              | 10                | 5                | 0               | 43              | 19          | 0            | 22           | 0              | 3              | 0              | 25                | 0              | 17             | 3              | 0              | 5              | 11              | 3               | 2                 | 0                | 0                  | 22                 | 2             | 0                | 8                 | 1                  | 0              |    |
| Otu00029 | 0                  | 4                 | 3               | 0               | 0                 | 0                | 0           | 1               | 2            | 0                 | 16              | 7           | 0                 | 2                | 4              | 2                  | 2             | 0              | 0               | 0              | 0              | 0              | 0               | 0            | 0                 | 78               | 66              | 1              | 1                 | 0                | 0                  | 0              | 6                 | 0                | 0               | 4               | 1           | 1            | 130          | 2              | 0              | 46             | 0                 | 1              | 34             | 1              | 0              | 0              | 1               | 54              | 81                | 6                | 0                  | 16                 | 0             | 34               | 1                 | 1                  | 0              | 12 |
| Otu00030 | 2                  |                   |                 |                 |                   |                  |             |                 |              |                   |                 |             |                   |                  |                |                    |               |                |                 |                |                |                |                 |              |                   |                  |                 |                |                   |                  |                    |                |                   |                  |                 |                 |             |              |              |                |                |                |                   |                |                |                |                |                |                 |                 |                   |                  |                    |                    |               |                  |                   |                    |                |    |
